# Supplementary material for: Deconvolution of transcriptomes and miRNomes by independent component analysis provides insights into biological processes and clinical outcomes of melanoma patients
Source: PubMed Central journal article supplement (PMC6751789; doi:10.1186/s12920-019-0578-4), 2019-09-18

# Supplementary Results

This is an automatic report, generated for the components discussed in the paper by the consensus ICA tool (consICA)

<https://gitlab.com/biomodlih/consica>

**Top enriched GO:**  
 biological processes (BP)  
 cellular components (CC)  
 molecular functions (MF)

Sorted gene contribution

Significantly contributing genes

**Survival analysis:**  
 Cox logtest p-value  
 and Kaplan-Meier plot

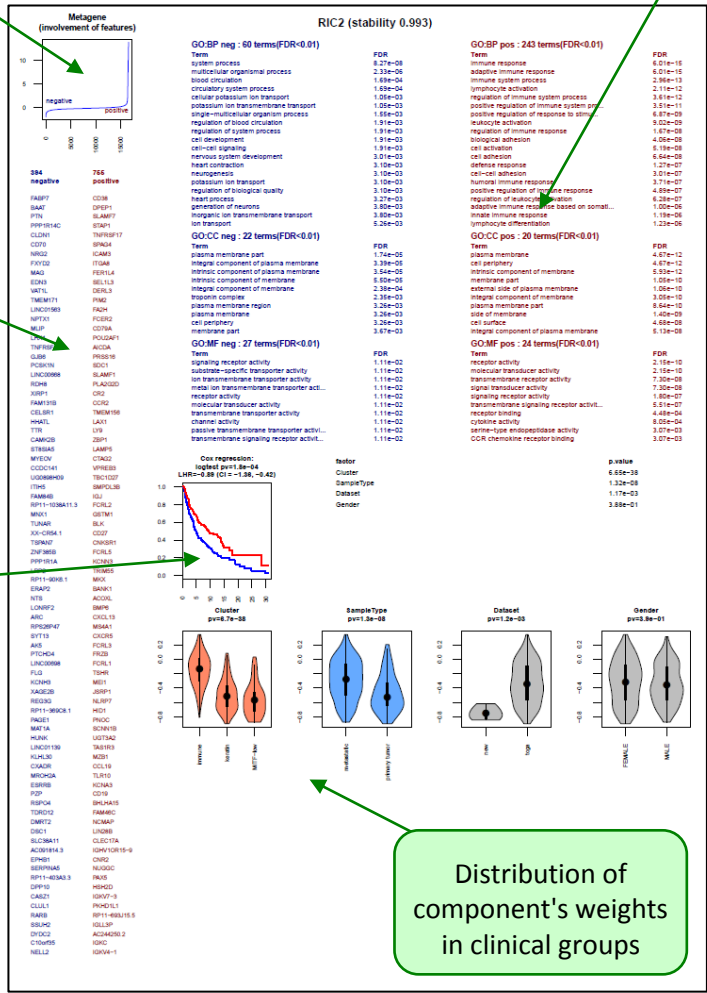

Distribution of component's weights in clinical groups

**Metagene**  
(involvement of features)

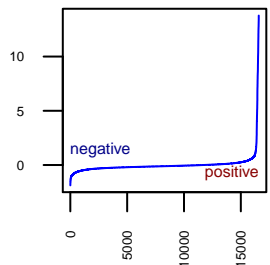

- |                     |                     |
|---------------------|---------------------|
| <b>394 negative</b> | <b>755 positive</b> |
| FABP7               | CD38                |
| BAAT                | DPEP1               |
| PTN                 | SLAMF7              |
| PPP1R14C            | STAP1               |
| CLDN1               | TNFRSF17            |
| CD70                | SPAG4               |
| NRG2                | ICAM3               |
| FXYD2               | ITGA8               |
| MAG                 | FER1L4              |
| EDN3                | SEL1L3              |
| VAT1L               | DERL3               |
| TMEM171             | PIM2                |
| LINC01563           | FA2H                |
| NPTX1               | FCER2               |
| MLIP                | CD79A               |
| LHX1                | POU2AF1             |
| TNFRSF10D           | AICDA               |
| GJB6                | PRSS16              |
| PCSK1N              | SDC1                |
| LINC00668           | SLAMF1              |
| RDH8                | PLA2G2D             |
| XIRP1               | CR2                 |
| FAM131B             | CCR2                |
| CELSR1              | TMEM156             |
| HHATL               | LAX1                |
| TTR                 | LY9                 |
| CAMK2B              | ZBP1                |
| ST8SIA5             | LAMP5               |
| MYEOV               | CTAG2               |
| CCDC141             | VPREB3              |
| UG0898H09           | TBC1D27             |
| ITIH5               | SMPDL3B             |
| FAM84B              | IGJ                 |
| RP11-1038A11.3      | FCRL2               |
| MNX1                | GSTM1               |
| TUNAR               | BLK                 |
| XX-CR54.1           | CD27                |
| TSPAN7              | CNKSRI              |
| ZNF385B             | FCRL5               |
| PPP1R1A             | KCNN3               |
| LRP2                | TRIM55              |
| RP11-90K6.1         | MKX                 |
| ERAP2               | BANK1               |
| NTS                 | ACOXL               |
| LONRF2              | BMP6                |
| ARC                 | CXCL13              |
| RPS26P47            | MS4A1               |
| SYT13               | CXCR5               |
| AK5                 | FCRL3               |
| PTCHD4              | FRZB                |
| LINC00698           | FCRL1               |
| FLG                 | TSHR                |
| KCNH3               | MEI1                |
| XAGE2B              | JSRP1               |
| REG3G               | NLRP7               |
| RP11-369C8.1        | HID1                |
| PAGE1               | PNOC                |
| MAT1A               | SCNN1B              |
| HUNK                | UGT3A2              |
| LINC01139           | TAS1R3              |
| KLHL30              | MZB1                |
| CXADR               | CCL19               |
| MROH2A              | TLR10               |
| ESRRB               | KCNA3               |
| PZP                 | CD19                |
| RSPO4               | BHLHA15             |
| TDRD12              | FAM46C              |
| DMRT2               | NCMAP               |
| DSC1                | LIN28B              |
| SLC38A11            | CLEC17A             |
| AC091814.3          | IGHV10R15-9         |
| EPHB1               | CNR2                |
| SERPINA5            | NUGGC               |
| RP11-403A3.3        | PAX5                |
| DPP10               | HSH2D               |
| CASZ1               | IGKV7-3             |
| CLUL1               | PKHD1L1             |
| RARB                | RP11-693J15.5       |
| SSUH2               | IGLL3P              |
| DYDC2               | AC244250.2          |
| C10orf35            | IGKC                |
| NELL2               | IGKV4-1             |

**RIC2 (stability 0.993)**

**GO:BP neg : 60 terms(FDR<0.01)**

| Term                                  | FDR      |
|---------------------------------------|----------|
| system process                        | 8.27e-08 |
| multicellular organismal process      | 2.33e-06 |
| blood circulation                     | 1.69e-04 |
| circulatory system process            | 1.69e-04 |
| cellular potassium ion transport      | 1.05e-03 |
| potassium ion transmembrane transport | 1.05e-03 |
| single-multicellular organism process | 1.55e-03 |
| regulation of blood circulation       | 1.91e-03 |
| regulation of system process          | 1.91e-03 |
| cell development                      | 1.91e-03 |
| cell-cell signaling                   | 1.91e-03 |
| nervous system development            | 3.01e-03 |
| heart contraction                     | 3.10e-03 |
| neurogenesis                          | 3.10e-03 |
| potassium ion transport               | 3.10e-03 |
| regulation of biological quality      | 3.10e-03 |
| heart process                         | 3.27e-03 |
| generation of neurons                 | 3.80e-03 |
| inorganic ion transmembrane transport | 3.80e-03 |
| ion transport                         | 5.26e-03 |

**GO:CC neg : 22 terms(FDR<0.01)**

| Term                                   | FDR      |
|----------------------------------------|----------|
| plasma membrane part                   | 1.74e-05 |
| integral component of plasma membrane  | 3.39e-05 |
| intrinsic component of plasma membrane | 3.54e-05 |
| intrinsic component of membrane        | 5.50e-05 |
| integral component of membrane         | 2.38e-04 |
| troponin complex                       | 2.35e-03 |
| plasma membrane region                 | 3.26e-03 |
| plasma membrane                        | 3.26e-03 |
| cell periphery                         | 3.26e-03 |
| membrane part                          | 3.67e-03 |

**GO:MF neg : 27 terms(FDR<0.01)**

| Term                                         | FDR      |
|----------------------------------------------|----------|
| signaling receptor activity                  | 1.11e-02 |
| substrate-specific transporter activity      | 1.11e-02 |
| ion transmembrane transporter activity       | 1.11e-02 |
| metal ion transmembrane transporter activity | 1.11e-02 |
| receptor activity                            | 1.11e-02 |
| molecular transducer activity                | 1.11e-02 |
| transmembrane transporter activity           | 1.11e-02 |
| channel activity                             | 1.11e-02 |
| passive transmembrane transporter activity   | 1.11e-02 |
| transmembrane signaling receptor activity    | 1.11e-02 |

**GO:BP pos : 243 terms(FDR<0.01)**

| Term                                               | FDR      |
|----------------------------------------------------|----------|
| immune response                                    | 6.01e-15 |
| adaptive immune response                           | 6.01e-15 |
| immune system process                              | 2.96e-13 |
| lymphocyte activation                              | 2.11e-12 |
| regulation of immune system process                | 3.61e-12 |
| positive regulation of immune system process       | 3.51e-11 |
| positive regulation of response to stimulus        | 6.87e-09 |
| leukocyte activation                               | 9.02e-09 |
| regulation of immune response                      | 1.67e-08 |
| biological adhesion                                | 4.06e-08 |
| cell activation                                    | 5.19e-08 |
| cell adhesion                                      | 6.64e-08 |
| defense response                                   | 1.27e-07 |
| cell-cell adhesion                                 | 3.01e-07 |
| humoral immune response                            | 3.71e-07 |
| positive regulation of immune response             | 4.89e-07 |
| regulation of leukocyte activation                 | 6.28e-07 |
| adaptive immune response based on somatic mutation | 1.00e-06 |
| innate immune response                             | 1.19e-06 |
| lymphocyte differentiation                         | 1.23e-06 |

**GO:CC pos : 20 terms(FDR<0.01)**

| Term                                  | FDR      |
|---------------------------------------|----------|
| plasma membrane                       | 4.67e-12 |
| cell periphery                        | 4.67e-12 |
| intrinsic component of membrane       | 5.93e-12 |
| membrane part                         | 1.05e-10 |
| external side of plasma membrane      | 1.06e-10 |
| integral component of membrane        | 3.05e-10 |
| plasma membrane part                  | 8.64e-10 |
| side of membrane                      | 1.40e-09 |
| cell surface                          | 4.68e-08 |
| integral component of plasma membrane | 5.13e-08 |

**GO:MF pos : 24 terms(FDR<0.01)**

| Term                                      | FDR      |
|-------------------------------------------|----------|
| receptor activity                         | 2.15e-10 |
| molecular transducer activity             | 2.15e-10 |
| transmembrane receptor activity           | 7.30e-08 |
| signal transducer activity                | 7.30e-08 |
| signaling receptor activity               | 1.80e-07 |
| transmembrane signaling receptor activity | 5.51e-07 |
| receptor binding                          | 4.48e-04 |
| cytokine activity                         | 8.05e-04 |
| serine-type endopeptidase activity        | 3.07e-03 |
| CCR chemokine receptor binding            | 3.07e-03 |

**Cox regression:**  
logtest pv=1.8e-04  
LHR=-0.89 (CI = -1.36, -0.42)

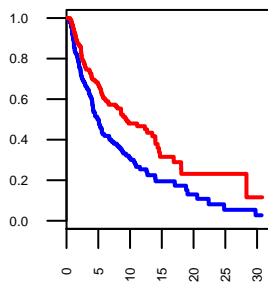

**factor**  
Cluster  
SampleType  
Dataset  
Gender

**p.value**  
6.65e-38  
1.32e-08  
1.17e-03  
3.88e-01

**Cluster**  
pv=6.7e-38

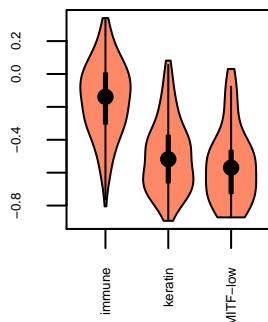

**SampleType**  
pv=1.3e-08

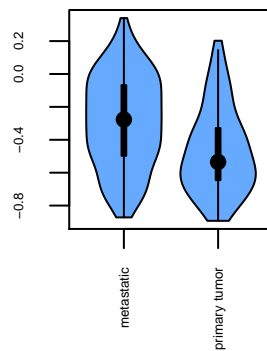

**Dataset**  
pv=1.2e-03

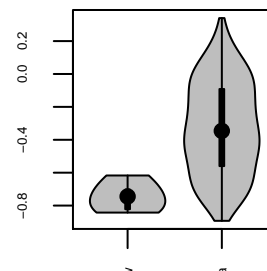

**Gender**  
pv=3.9e-01

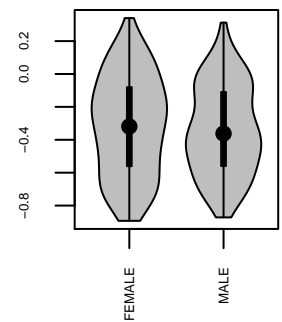

**Metagene**

(involvement of features)

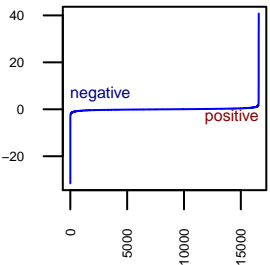

**498 negative**

- XIST
- PAGE2
- PPP1R3C
- ASB11
- HERC2P3
- MAGEB1
- NLRP2
- PAGE2B
- PRSS21
- CNTN3
- MAGEB2
- PCSK2
- CPSF1P1
- COL9A1
- SLITRK6
- MKRN3
- CRABP1
- PDLIM4
- VCX
- HOXD11
- TDRD12
- HIST1H2AE
- RP11-299H22.3
- HOXC12
- ENPP5
- HOXD10
- ABHD12B
- PSPHP1
- XG
- CCL13
- RP1-90G24.6
- CSMD1
- AC016708.2
- DSG2
- FAM178B
- HCN1
- AL035610.1
- CXCL1
- CCL22
- KLK2
- HDHD1
- ZRSR2
- SSX1
- CXCL8
- APOC2
- KDM6A
- PCDHGB5
- UGT2B7
- HOXB8
- DDX3X
- RP11-60L3.1
- SYT5
- FDCSP
- FLJ36000
- GEMIN8
- TSPYL5
- ADAMTS16
- THNSL2
- CA5BP1
- ZFX
- ROS1
- RP11-706O15.1
- HAS1
- RPS4X
- COL11A2
- RAB33A
- GRPR
- TRAPPC2
- ARSD
- NLGN4X
- SYT1
- PCDHGA3
- MYL10
- HOXD13
- ACAN
- RP11-431J24.2
- VCX3A
- HPSE2
- GLRA2
- RP11-218E20.3

**431 positive**

- KDM5D
- DDX3Y
- ZFY
- ADCY2
- DDX43
- PRKY
- USP9Y
- POMC
- EDN3
- RPS4Y1
- TXLNGY
- NLGN4Y
- TSPY2
- UTY
- EIF1AY
- GYG2P1
- IGHV1-69
- RP11-98L5.4
- RP4-610C12.3
- TTY15
- RBMV2QP
- RP11-333A23.4
- OVC11-AS1
- SPESP1
- TSPY1
- LHX1
- RPS4Y2
- SH3GL2
- CTC-523E23.5
- SCN7A
- RP11-12M5.3
- HAMP
- CTNNA2
- MARVELD2
- PEX5L
- SYN2
- TMEM233
- XAGE2B
- RP11-1109M24.5
- MAGEC2
- FAM163A
- NRK
- RP11-575F12.3
- RP4-644L1.2
- ADARB2
- TRPM6
- RP11-63E9.1
- TSPAN8
- HORMAD1
- PCDHGA12
- SLC30A8
- RP11-529E10.7
- IGHG4
- YG2
- ERAP2
- RP11-488I20.8
- LINC00944
- MUC15
- FBXL21
- CBLN4
- CTD-2380F24.1
- PTCHD3
- MKRN9P
- HS3ST2
- CSF2RA
- SLC24A4
- RP11-599J14.2
- SIM2
- CACNA1A
- EVA1A
- RP11-66B24.7
- NPPC
- EN2
- CSDC2
- TRABD2B
- COCH
- SAMD5
- HDHD3
- ENKUR
- CAP2
- KIF25
- TBX18

**RIC3 (stability 0.995)**

**GO:BP neg : 24 terms(FDR<0.01)**

| Term                                        | FDR      |
|---------------------------------------------|----------|
| embryonic skeletal system development       | 2.11e-02 |
| embryonic skeletal system morphogenesis     | 2.11e-02 |
| multicellular organismal process            | 2.14e-02 |
| anatomical structure development            | 2.14e-02 |
| developmental process                       | 2.17e-02 |
| anterior/posterior pattern specification    | 2.36e-02 |
| antimicrobial humoral response              | 2.82e-02 |
| chemokine-mediated signaling pathway        | 2.82e-02 |
| antibacterial humoral response              | 3.91e-02 |
| positive regulation of granulocyte chemo... | 3.91e-02 |
| single-organism developmental process       | 5.26e-02 |
| G-protein coupled receptor signaling pat... | 5.26e-02 |
| adult behavior                              | 5.48e-02 |
| nervous system development                  | 5.48e-02 |
| serotonin receptor signaling pathway        | 5.48e-02 |
| G-protein coupled serotonin receptor sig... | 5.48e-02 |
| multicellular organism development          | 5.48e-02 |
| embryonic organ morphogenesis               | 6.26e-02 |
| chemical synaptic transmission, postsyna... | 6.63e-02 |
| system process                              | 6.63e-02 |

**GO:CC neg : 11 terms(FDR<0.01)**

| Term                                   | FDR      |
|----------------------------------------|----------|
| proteinaceous extracellular matrix     | 2.47e-03 |
| extracellular matrix                   | 2.47e-03 |
| nucleosome                             | 2.75e-03 |
| DNA packaging complex                  | 6.60e-03 |
| integral component of plasma membrane  | 6.60e-03 |
| intrinsic component of plasma membrane | 8.86e-03 |
| extracellular region part              | 3.05e-02 |
| extracellular region                   | 3.05e-02 |
| extracellular space                    | 3.05e-02 |
| collagen trimer                        | 5.87e-02 |

**GO:MF neg : 22 terms(FDR<0.01)**

| Term                                        | FDR      |
|---------------------------------------------|----------|
| chemokine activity                          | 6.01e-03 |
| extracellular matrix structural constitu... | 1.00e-02 |
| extracellular matrix structural constitu... | 1.00e-02 |
| chemokine receptor binding                  | 1.00e-02 |
| cytokine activity                           | 1.00e-02 |
| CXCR chemokine receptor binding             | 1.00e-02 |
| transmembrane receptor activity             | 1.91e-02 |
| signaling receptor activity                 | 1.91e-02 |
| neurotransmitter receptor activity          | 1.91e-02 |
| G-protein coupled receptor binding          | 1.91e-02 |

**GO:BP pos : 5 terms(FDR<0.01)**

| Term                                  | FDR      |
|---------------------------------------|----------|
| multicellular organismal process      | 2.41e-03 |
| single-multicellular organism process | 5.04e-03 |
| cell-cell signaling                   | 8.42e-02 |
| neurological system process           | 8.42e-02 |
| anatomical structure development      | 8.42e-02 |

**GO:CC pos : 13 terms(FDR<0.01)**

| Term                                   | FDR      |
|----------------------------------------|----------|
| neuron part                            | 9.17e-03 |
| cell periphery                         | 9.17e-03 |
| extracellular space                    | 9.17e-03 |
| integral component of plasma membrane  | 9.17e-03 |
| plasma membrane                        | 1.24e-02 |
| presynapse                             | 1.24e-02 |
| plasma membrane part                   | 1.24e-02 |
| intrinsic component of plasma membrane | 1.24e-02 |
| perikaryon                             | 1.75e-02 |
| synapse                                | 2.67e-02 |

**GO:MF pos : 1 terms(FDR<0.01)**

| Term             | FDR      |
|------------------|----------|
| hormone activity | 4.72e-02 |

**Cox regression:  
logtest pv=1.9e-01  
LHR=0.72 (CI = -0.35, 1.79)**

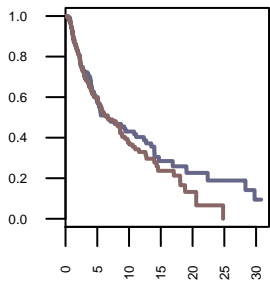

**factor**  
Gender  
Dataset  
Cluster  
SampleType

**p.value**  
3.25e-226  
1.61e-01  
2.11e-01  
2.16e-01

**Gender  
pv=3.2e-226**

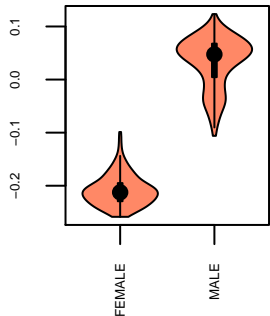

**Dataset  
pv=1.6e-01**

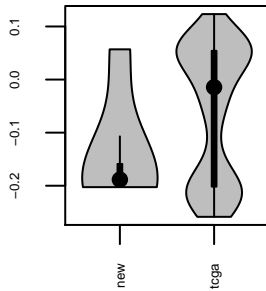

**Cluster  
pv=2.1e-01**

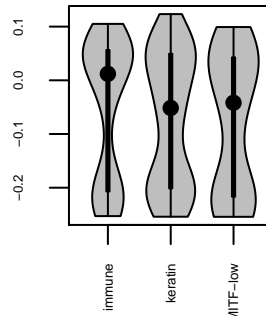

**SampleType  
pv=2.2e-01**

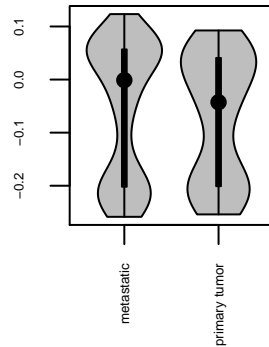

**Metagene**  
(involvement of features)

**RIC4 (stability 0.935)**

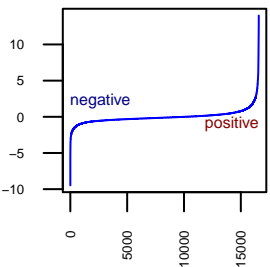

**359 negative**      **875 positive**

- |               |           |
|---------------|-----------|
| MAGEA4        | ABCB5     |
| MAEL          | ASB4      |
| RP11-366F6.2  | CDH1      |
| PASD1         | USH2A     |
| PRSS21        | MAGEC2    |
| ILDR2         | MCOLN3    |
| CTCFL         | RASGRF1   |
| VAX1          | CDH3      |
| RP11-1220K2.2 | CTNNA2    |
| CT45A1        | TYR       |
| AP001065.15   | DCT       |
| MAGEB2        | TDRD3     |
| CLEC2L        | RPH3A     |
| TDRD9         | BIRC7     |
| SOHLH1        | GPR143    |
| FAR2P1        | BMX       |
| FREM1         | LUZP4     |
| SAGE1         | GAPDHS    |
| PAGE1         | TYRP1     |
| DLX6          | BCHE      |
| P3H2          | MORC1     |
| COL9A1        | LPPR5     |
| PNMA5         | MMP8      |
| ASPG          | MLANA     |
| RAP1GAP2      | LDB3      |
| CT45A10       | IL13RA2   |
| LY6K          | TRIM51    |
| LRP1B         | PRDM7     |
| DLX6-AS1      | OR7C1     |
| DPEP3         | DPP6      |
| HOXC12        | FCRLA     |
| SLC6A10P      | ALDH3B2   |
| CADM3         | DYDC2     |
| DMRT2         | TRPM1     |
| TCAM1P        | SYT6      |
| LHFPL4        | TCN1      |
| POU6F2        | HRK       |
| ZFR2          | BAAT      |
| SYNM          | DNASE2B   |
| FRMPD3        | CYP1A1    |
| EXTL1         | SPACA3    |
| XDH           | CHRNA6    |
| SAMD12        | SNTG1     |
| COL4A5        | PMP2      |
| TLX1          | TRIM48    |
| ALDH1A3       | MAT1A     |
| LINC01019     | CYSLTR2   |
| MAPK4         | GRM1      |
| SERPINA5      | MAGEC1    |
| MAGEA10       | KIT       |
| GAGE2A        | TRIM63    |
| ITGA9         | IP6K3     |
| LOXL4         | WDR63     |
| LPAR1         | LRRTM1    |
| SFRP5         | XIRP2     |
| PLCXD3        | SYNPR     |
| ENTPD2        | HPGD      |
| DISP2         | SLC45A2   |
| TUNAR         | GPR98     |
| KANK4         | BAALC     |
| KCNS1         | ASB11     |
| GCNT1         | KCNC2     |
| HNF4G         | PKD1L2    |
| MAGEA8        | MS4A8     |
| WNK4          | D4S234E   |
| NACAD         | FSTL5     |
| PDE1C         | PCSK9     |
| MIR4697HG     | IL1RAPL1  |
| TDRD12        | UGT2B7    |
| RP3-410C9.2   | DEC1      |
| GPR12         | GALNTL6   |
| ARHGEF4       | OR9G1     |
| ADARB2        | KLHL38    |
| CCDC141       | ENTHD1    |
| CH17-437K3.1  | RIMS2     |
| UG0898H09     | NCKAP5    |
| ISL1          | CA8       |
| FOXP1         | ANKRD30B  |
| GALNT8        | NXPH4     |
| RGS9          | LINC00518 |
| MAPK15        | KRTAP19-1 |
| TCF24         | ROBO2     |

**GO:BP neg : 97 terms(FDR<0.01)**

| Term                                        | FDR      |
|---------------------------------------------|----------|
| multicellular organismal process            | 7.22e-08 |
| single-multicellular organism process       | 1.28e-06 |
| nervous system development                  | 1.25e-05 |
| anatomical structure development            | 2.44e-05 |
| multicellular organism development          | 4.21e-05 |
| developmental process                       | 2.36e-04 |
| neurological system process                 | 2.36e-04 |
| single-organism developmental process       | 2.44e-04 |
| anatomical structure morphogenesis          | 2.84e-04 |
| system development                          | 3.46e-04 |
| negative regulation of neurogenesis         | 1.08e-03 |
| generation of neurons                       | 1.50e-03 |
| cell development                            | 1.90e-03 |
| regulation of neurogenesis                  | 1.90e-03 |
| locomotory behavior                         | 1.90e-03 |
| negative regulation of nervous system de... | 2.26e-03 |
| regulation of nervous system development    | 2.39e-03 |
| neurogenesis                                | 3.26e-03 |
| animal organ morphogenesis                  | 3.98e-03 |
| negative regulation of cell development     | 3.98e-03 |

**GO:CC neg : 25 terms(FDR<0.01)**

| Term                                  | FDR      |
|---------------------------------------|----------|
| neuron part                           | 5.13e-03 |
| proteinaceous extracellular matrix    | 6.97e-03 |
| extracellular matrix                  | 1.16e-02 |
| neuronal cell body                    | 2.66e-02 |
| cell body                             | 4.40e-02 |
| cation channel complex                | 4.58e-02 |
| ion channel complex                   | 4.58e-02 |
| integral component of plasma membrane | 4.58e-02 |
| somatodendritic compartment           | 4.58e-02 |
| synapse part                          | 4.58e-02 |

**GO:MF neg : 2 terms(FDR<0.01)**

| Term                                        | FDR      |
|---------------------------------------------|----------|
| gated channel activity                      | 5.58e-02 |
| metal ion transmembrane transporter acti... | 9.23e-02 |

**GO:BP pos : 81 terms(FDR<0.01)**

| Term                                        | FDR      |
|---------------------------------------------|----------|
| sensory perception                          | 5.26e-08 |
| multicellular organismal process            | 1.28e-07 |
| system process                              | 4.21e-06 |
| neurological system process                 | 7.14e-06 |
| phenol-containing compound biosynthetic ... | 1.23e-05 |
| melanin biosynthetic process                | 1.23e-05 |
| melanin metabolic process                   | 2.02e-05 |
| secondary metabolite biosynthetic proces... | 3.20e-05 |
| ion transmembrane transport                 | 9.19e-05 |
| system development                          | 9.62e-05 |
| developmental pigmentation                  | 1.03e-04 |
| transmembrane transport                     | 1.03e-04 |
| single-multicellular organism process       | 1.39e-04 |
| visual perception                           | 1.40e-04 |
| sensory perception of light stimulus        | 1.90e-04 |
| secondary metabolic process                 | 3.10e-04 |
| single-organism process                     | 4.33e-04 |
| multicellular organism development          | 7.43e-04 |
| detection of stimulus involved in sensor... | 7.76e-04 |
| ion transport                               | 1.05e-03 |

**GO:CC pos : 15 terms(FDR<0.01)**

| Term                                   | FDR      |
|----------------------------------------|----------|
| plasma membrane                        | 4.77e-13 |
| cell periphery                         | 4.77e-13 |
| intrinsic component of membrane        | 1.77e-12 |
| integral component of membrane         | 8.71e-12 |
| membrane part                          | 2.24e-09 |
| plasma membrane part                   | 2.47e-09 |
| integral component of plasma membrane  | 1.20e-08 |
| intrinsic component of plasma membrane | 1.88e-08 |
| melanosome membrane                    | 3.30e-04 |
| chitosome                              | 3.30e-04 |

**GO:MF pos : 28 terms(FDR<0.01)**

| Term                                        | FDR      |
|---------------------------------------------|----------|
| transmembrane transporter activity          | 3.69e-06 |
| channel activity                            | 8.87e-06 |
| passive transmembrane transporter activi... | 8.87e-06 |
| transporter activity                        | 3.76e-05 |
| calcium ion binding                         | 7.04e-05 |
| substrate-specific channel activity         | 7.87e-05 |
| signaling receptor activity                 | 2.15e-04 |
| ion transmembrane transporter activity      | 2.15e-04 |
| ion channel activity                        | 2.97e-04 |
| receptor activity                           | 2.97e-04 |

**Cox regression:**  
logtest pv=5.4e-03  
LHR=1.13 (CI = 0.32, 1.94)

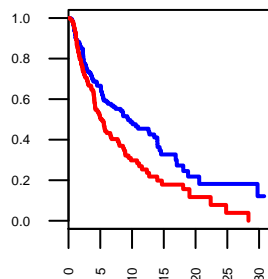

**Cluster**  
pv=7.3e-14

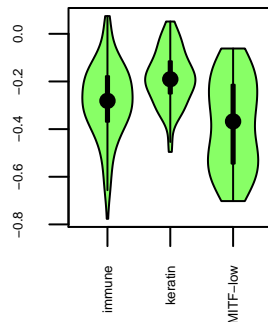

**factor**  
Cluster  
SampleType  
Dataset  
Gender

**p.value**  
7.28e-14  
2.33e-05  
8.09e-02  
2.46e-01

**SampleType**  
pv=2.3e-05

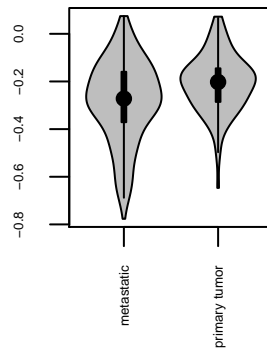

**Dataset**  
pv=8.1e-02

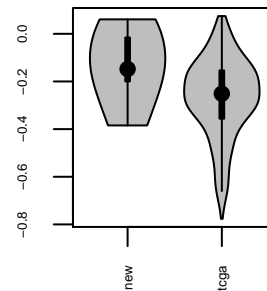

**Gender**  
pv=2.5e-01

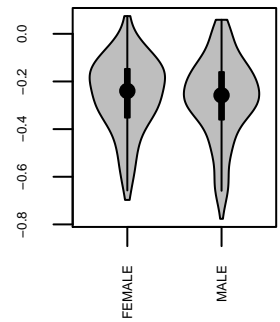

**Metagene**  
(involvement of features)

**RIC5 (stability 0.993)**

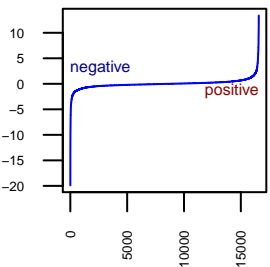

**685 negative**      **779 positive**

- |           |           |
|-----------|-----------|
| BPIFB1    | WNT16     |
| KRT4      | DLX3      |
| KRT19     | PPP2R2C   |
| KRT13     | HAL       |
| MUC21     | APOB      |
| CEACAM6   | SLC15A1   |
| SPRR3     | PLA2G3    |
| PIGR      | SALL1     |
| CRNN      | STMN2     |
| MUC4      | EPHX3     |
| STATH     | CASP14    |
| SLC34A2   | SLC1A6    |
| DMBT1     | CNFN      |
| AGR2      | FOXN1     |
| CEACAM5   | CWH43     |
| SFTPB     | ELMOD1    |
| BPIFB2    | UNC93A    |
| PRH2      | IRX4      |
| KRT7      | ARG1      |
| PRB3      | TP53AIP1  |
| ELF3      | LYPD3     |
| CXCL17    | FAM83C    |
| FOLR1     | SLURP1    |
| SCGB3A1   | TUBA4A    |
| PIP       | CPA4      |
| WFDC2     | BBOX1     |
| LCN2      | KLK8      |
| PRB4      | KRT34     |
| SCGB3A2   | SLC6A11   |
| NTS       | RHBG      |
| SCGB1A1   | DSG1      |
| MUC16     | DSC1      |
| SFTPA2    | IL36G     |
| CLCA4     | IL36RN    |
| MUC5B     | POU2F3    |
| GSTA1     | RDH12     |
| TMPRSS2   | IL22RA1   |
| TMPRSS11A | CRABP2    |
| PPP1R1B   | FLG2      |
| SFTPA1    | S100A7    |
| DUOX2     | FLG       |
| CXCL6     | ABCA12    |
| TSPAN1    | GSDMC     |
| CTSE      | CDHR1     |
| UPK1B     | LYPD6B    |
| EPCAM     | PLA2G2F   |
| DSG3      | CDA       |
| KRT6A     | PLA2G4D   |
| CYP4B1    | LCE2B     |
| TMPRSS11E | SPRR2G    |
| MMP7      | PGLYRP3   |
| FAM3D     | DMKN      |
| TGM3      | HS3ST6    |
| CLDN3     | LCE3D     |
| KLK3      | PGLYRP4   |
| SLPI      | S100A9    |
| LTF       | ELOVL7    |
| NKX2-1    | GPR111    |
| MB        | RAET1E    |
| KRT5      | AMER2     |
| OLFM4     | SLC39A2   |
| LPO       | RNASE7    |
| BMP3      | SERPINA12 |
| LIPH      | ASPG      |
| KRT15     | SERPINB7  |
| ZG16B     | SERPINB12 |
| KRT8      | HTR3A     |
| MS4A15    | CHP2      |
| MMP12     | KLK5      |
| ODAM      | KRT1      |
| SPDEF     | ACER1     |
| SLC44A4   | GSDMA     |
| CST5      | DNASE1L2  |
| GABRP     | WFDC12    |
| PAX9      | PLA2G4F   |
| VSIG2     | KLK7      |
| CLDN10    | COL22A1   |
| TRIM29    | CRCT1     |
| MYH7      | SDR9C7    |
| WIF1      | KRT75     |
| FAM3B     | KRT9      |
| FDCSP     | CYP4F22   |

**GO:BP neg : 294 terms(FDR<0.01)**

| Term                                        | FDR      |
|---------------------------------------------|----------|
| multicellular organism process              | 2.71e-17 |
| single-multicellular organism process       | 8.27e-14 |
| tissue development                          | 5.01e-12 |
| system process                              | 1.39e-10 |
| anatomical structure development            | 4.81e-10 |
| developmental process                       | 4.26e-09 |
| single-organism developmental process       | 4.73e-09 |
| system development                          | 8.46e-09 |
| epithelial cell differentiation             | 1.65e-08 |
| multicellular organism development          | 1.65e-08 |
| epithelium development                      | 1.16e-07 |
| anatomical structure morphogenesis          | 1.38e-07 |
| humoral immune response                     | 1.85e-07 |
| sensory perception                          | 1.72e-06 |
| neurological system process                 | 2.51e-06 |
| antimicrobial humoral response              | 3.80e-06 |
| animal organ development                    | 3.80e-06 |
| defense response to bacterium               | 5.60e-06 |
| cornification                               | 8.71e-06 |
| negative regulation of peptidase activit... | 1.50e-05 |

**GO:CC neg : 48 terms(FDR<0.01)**

| Term                               | FDR      |
|------------------------------------|----------|
| extracellular region               | 9.17e-29 |
| extracellular space                | 9.17e-29 |
| extracellular region part          | 1.47e-23 |
| cell periphery                     | 7.79e-09 |
| plasma membrane                    | 1.06e-08 |
| extracellular exosome              | 1.26e-08 |
| plasma membrane part               | 1.26e-08 |
| extracellular organelle            | 1.34e-08 |
| extracellular vesicle              | 1.34e-08 |
| proteinaceous extracellular matrix | 1.08e-07 |

**GO:MF neg : 40 terms(FDR<0.01)**

| Term                               | FDR      |
|------------------------------------|----------|
| serine-type endopeptidase activity | 4.64e-05 |
| endopeptidase inhibitor activity   | 4.64e-05 |
| peptidase inhibitor activity       | 4.64e-05 |
| peptidase regulator activity       | 4.64e-05 |
| endopeptidase regulator activity   | 4.64e-05 |
| serine-type peptidase activity     | 2.00e-04 |
| serine hydrolase activity          | 2.45e-04 |
| receptor binding                   | 4.35e-04 |
| cytokine activity                  | 1.00e-03 |
| heparin binding                    | 1.16e-03 |

**GO:BP pos : 77 terms(FDR<0.01)**

| Term                                  | FDR      |
|---------------------------------------|----------|
| epidermis development                 | 2.51e-28 |
| keratinocyte differentiation          | 2.51e-28 |
| skin development                      | 2.51e-28 |
| epidermal cell differentiation        | 2.51e-28 |
| keratinization                        | 2.51e-28 |
| cornification                         | 2.51e-28 |
| epithelial cell differentiation       | 9.02e-26 |
| peptide cross-linking                 | 4.70e-25 |
| epithelium development                | 1.55e-15 |
| tissue development                    | 6.32e-13 |
| cell differentiation                  | 1.37e-07 |
| single-multicellular organism process | 3.38e-07 |
| multicellular organismal process      | 5.44e-07 |
| cellular developmental process        | 7.20e-07 |
| establishment of skin barrier         | 1.80e-06 |
| regulation of water loss via skin     | 5.83e-06 |
| anatomical structure development      | 1.24e-05 |
| animal organ development              | 2.84e-05 |
| antimicrobial humoral response        | 6.25e-05 |
| defense response to bacterium         | 7.22e-05 |

**GO:CC pos : 26 terms(FDR<0.01)**

| Term                               | FDR      |
|------------------------------------|----------|
| cornified envelope                 | 1.83e-28 |
| extracellular region               | 8.43e-12 |
| plasma membrane                    | 6.72e-11 |
| extracellular space                | 7.79e-11 |
| cell periphery                     | 9.53e-11 |
| intermediate filament              | 1.83e-06 |
| intermediate filament cytoskeleton | 7.33e-06 |
| extracellular region part          | 4.81e-05 |
| epidermal lamellar body            | 8.15e-04 |
| keratin filament                   | 1.25e-03 |

**GO:MF pos : 48 terms(FDR<0.01)**

| Term                                        | FDR      |
|---------------------------------------------|----------|
| structural molecule activity                | 6.01e-07 |
| structural constituent of epidermis         | 4.08e-04 |
| serine-type endopeptidase inhibitor acti... | 1.22e-03 |
| endopeptidase inhibitor activity            | 1.50e-03 |
| peptidase inhibitor activity                | 1.98e-03 |
| endopeptidase regulator activity            | 2.08e-03 |
| lipase activity                             | 3.19e-03 |
| alcohol binding                             | 2.48e-02 |
| sterol binding                              | 2.48e-02 |
| metal ion transmembrane transporter acti... | 2.52e-02 |

**Cox regression:**  
logtest pv=5.8e-03  
LHR=1.54 (CI = 0.52, 2.56)

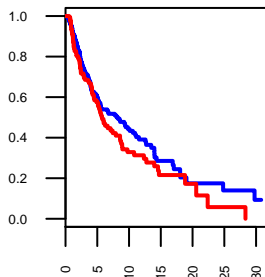

**factor**  
SampleType  
Cluster  
Dataset  
Gender

**p.value**  
1.05e-43  
6.35e-16  
1.35e-04  
6.14e-01

**SampleType**  
pv=1.0e-43

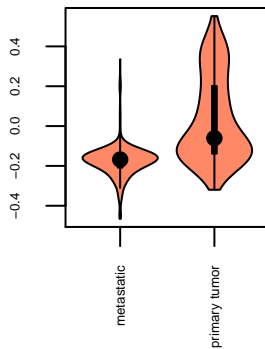

**Cluster**  
pv=6.4e-16

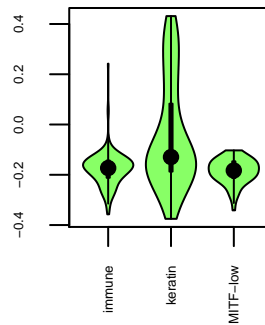

**Dataset**  
pv=1.4e-04

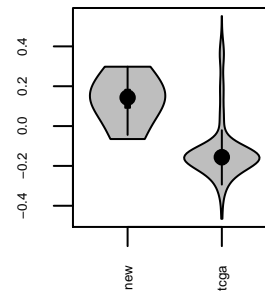

**Gender**  
pv=6.1e-01

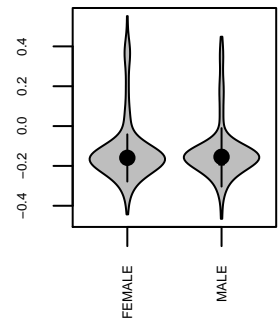

**Metagene**

(involvement of features)

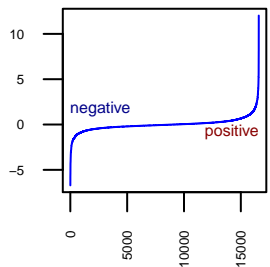

**600 negative**

**886 positive**

- |               |             |
|---------------|-------------|
| FRG2DP        | KLHL13      |
| CA8           | ASB4        |
| TYRP1         | HHATL       |
| OCA2          | MYOC        |
| GRIK2         | CDH1        |
| MGAT5B        | MCOLN3      |
| TRIM48        | MPPED2      |
| PMP2          | PHKA1       |
| ROBO2         | C1QTNF3     |
| RNF182        | TFAP2C      |
| PAEP          | FXYD3       |
| MAL           | TF          |
| SLC38A8       | CYP26A1     |
| SLC16A6       | CRTAC1      |
| AC010967.2    | HCN2        |
| ABCB4         | GLRA2       |
| LINC01198     | PRSS33      |
| FSTL5         | CORO2B      |
| SLC7A4        | EYA1        |
| WIPF3         | SFRP1       |
| RP6-24A23.7   | HPN         |
| ST8SIA2       | SCN1B       |
| SLCS4A        | PPARGC1A    |
| LINC00052     | MGP         |
| DLGAP1        | TPD52L1     |
| BMPR1B        | EVA1A       |
| WDR72         | OLFM3       |
| INSC          | SPP1        |
| LYPD1         | PYROXD2     |
| LINC01502     | GJB6        |
| MLIP          | HTN1        |
| ITGB8         | SSX1        |
| SUSD5         | ATP1B2      |
| COBL          | RNASE1      |
| COL19A1       | VSTM2L      |
| CHADL         | LGALS12     |
| NPPC          | TEX15       |
| ENTHD1        | CRB1        |
| RP11-63E9.1   | TBX3        |
| KCNS3         | AMHR2       |
| IRS4          | PH15        |
| RP6-24A23.3   | LOXL4       |
| SLAMF9        | PRKG2       |
| DPP6          | FRAS1       |
| ADCY2         | ITGA10      |
| DKK1          | ATP1B1      |
| OPRD1         | REG3G       |
| PHACTR3       | PLA1A       |
| NCAM2         | RP11-35N6.1 |
| NOV           | HMGA2       |
| FCRLA         | CLEC1A      |
| ARX           | LG14        |
| CTNND2        | CHST9       |
| PRUNE2        | C4orf19     |
| MTCL1         | PIEZO2      |
| GPM6A         | CNTNAP5     |
| PRSS12        | GRIP1       |
| SLITRK5       | TSPAN7      |
| SLC24A4       | HKDC1       |
| LCE2A         | NBL1        |
| LINC01293     | HOXB13      |
| MMP8          | UROC1       |
| AC108142.1    | SLC9C2      |
| NR4A3         | CADPS       |
| CLDN14        | ETNPPL      |
| EPS8L2        | HPGD        |
| GFRA3         | HCN1        |
| CFAP61        | FREM1       |
| CXADR         | ASB11       |
| DNAJC6        | GJB2        |
| KRTAP19-1     | NELL1       |
| KCNN2         | KCNC2       |
| KCNH1         | MS4A8       |
| WDR17         | MYO5B       |
| SLC35F1       | TTYH1       |
| DNER          | GDNF        |
| RAMP1         | PCDH7       |
| ABCC2         | TTL6        |
| RP11-317M11.1 | SOSTDC1     |
| EPHA8         | AQP4        |
| CCDC171       | CYP7B1      |
| PCYT1B        | LRRTM4      |

**RIC6 (stability 0.593)**

**GO:BP neg : 50 terms(FDR<0.01)**

| Term                                        | FDR      |
|---------------------------------------------|----------|
| multicellular organismal process            | 5.11e-04 |
| generation of neurons                       | 7.02e-04 |
| neuron differentiation                      | 7.02e-04 |
| neuron projection development               | 7.27e-04 |
| neurogenesis                                | 7.27e-04 |
| neuron development                          | 7.27e-04 |
| single-organism process                     | 8.81e-04 |
| anatomical structure development            | 1.84e-03 |
| sensory perception                          | 1.84e-03 |
| multicellular organism development          | 2.41e-03 |
| nervous system development                  | 2.91e-03 |
| axon development                            | 2.91e-03 |
| G-protein coupled receptor signaling pat... | 2.91e-03 |
| cell morphogenesis involved in neuron di... | 2.91e-03 |
| single-multicellular organism process       | 2.91e-03 |
| cell projection morphogenesis               | 2.91e-03 |
| neurological system process                 | 3.34e-03 |
| neuron projection morphogenesis             | 3.34e-03 |
| cell adhesion                               | 4.59e-03 |
| biological adhesion                         | 4.99e-03 |

**GO:CC neg : 55 terms(FDR<0.01)**

| Term                                   | FDR      |
|----------------------------------------|----------|
| intrinsic component of membrane        | 1.78e-13 |
| integral component of membrane         | 1.19e-11 |
| membrane part                          | 8.55e-11 |
| intrinsic component of plasma membrane | 2.70e-09 |
| integral component of plasma membrane  | 4.03e-09 |
| cell periphery                         | 7.33e-09 |
| plasma membrane                        | 9.69e-09 |
| plasma membrane part                   | 1.24e-08 |
| proteinaceous extracellular matrix     | 1.38e-06 |
| neuron part                            | 8.07e-05 |

**GO:MF neg : 8 terms(FDR<0.01)**

| Term                                        | FDR      |
|---------------------------------------------|----------|
| receptor activity                           | 3.86e-11 |
| molecular transducer activity               | 3.86e-11 |
| signaling receptor activity                 | 4.87e-08 |
| transmembrane receptor activity             | 3.01e-07 |
| transmembrane signaling receptor activit... | 3.01e-07 |
| signal transducer activity                  | 6.94e-06 |
| receptor binding                            | 6.13e-04 |
| G-protein coupled receptor activity         | 1.88e-02 |

**GO:BP pos : 304 terms(FDR<0.01)**

| Term                                        | FDR      |
|---------------------------------------------|----------|
| multicellular organismal process            | 9.17e-14 |
| single-multicellular organism process       | 1.43e-12 |
| system development                          | 1.45e-11 |
| system process                              | 1.05e-10 |
| multicellular organism development          | 2.01e-10 |
| single-organism process                     | 3.51e-09 |
| anatomical structure development            | 9.67e-09 |
| single organism signaling                   | 1.82e-08 |
| signaling                                   | 2.17e-08 |
| sensory perception                          | 2.71e-08 |
| cell communication                          | 3.83e-08 |
| anatomical structure morphogenesis          | 5.39e-08 |
| regulation of multicellular organismal p... | 7.63e-08 |
| developmental process                       | 8.38e-08 |
| sensory perception of mechanical stimulu... | 1.30e-07 |
| single-organism developmental process       | 1.97e-07 |
| animal organ development                    | 4.68e-07 |
| nervous system development                  | 4.68e-07 |
| neurological system process                 | 6.01e-07 |
| regulation of developmental process         | 1.58e-06 |

**GO:CC pos : 43 terms(FDR<0.01)**

| Term                                   | FDR      |
|----------------------------------------|----------|
| plasma membrane part                   | 4.03e-13 |
| cell periphery                         | 1.28e-12 |
| plasma membrane                        | 1.83e-12 |
| integral component of plasma membrane  | 3.02e-11 |
| intrinsic component of plasma membrane | 7.33e-11 |
| extracellular space                    | 1.19e-08 |
| extracellular region                   | 1.31e-08 |
| intrinsic component of membrane        | 4.12e-08 |
| integral component of membrane         | 2.85e-07 |
| membrane part                          | 1.15e-06 |

**GO:MF pos : 49 terms(FDR<0.01)**

| Term                                        | FDR      |
|---------------------------------------------|----------|
| receptor activity                           | 4.29e-06 |
| molecular transducer activity               | 4.29e-06 |
| metal ion transmembrane transporter acti... | 4.29e-06 |
| channel activity                            | 9.20e-06 |
| passive transmembrane transporter activi... | 9.20e-06 |
| transmembrane receptor activity             | 9.20e-06 |
| substrate-specific channel activity         | 9.20e-06 |
| ion channel activity                        | 1.61e-05 |
| cation channel activity                     | 2.05e-05 |
| transmembrane transporter activity          | 2.64e-05 |

**Cox regression:  
logtest pv=5.5e-03  
LHR=-1.45 (CI = -2.49, -0.41)**

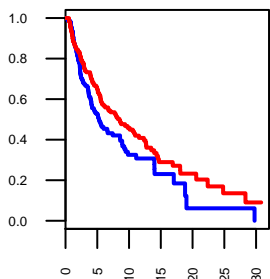

**Cluster  
pv=4.5e-06**

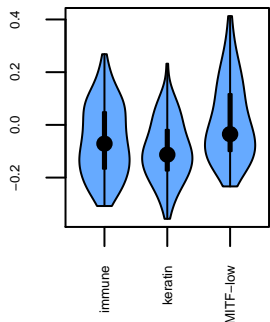

**factor**  
Cluster  
SampleType  
Gender  
Dataset

**p.value**  
4.49e-06  
2.23e-02  
7.25e-02  
4.75e-01

**SampleType  
pv=2.2e-02**

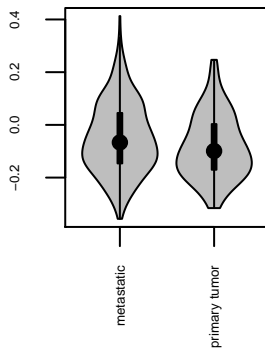

**Gender  
pv=7.3e-02**

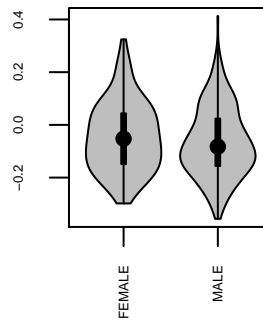

**Dataset  
pv=4.7e-01**

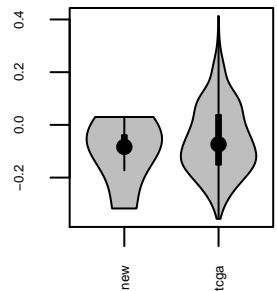

**Metagene**

(involvement of features)

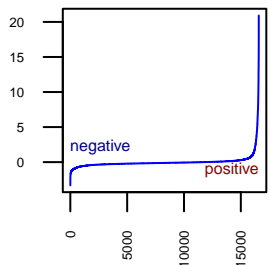

|                     |                     |
|---------------------|---------------------|
| <b>556 negative</b> | <b>908 positive</b> |
| ADIPOQ              | PRSS22              |
| WT1                 | TTC22               |
| PCK1                | PLEKHG6             |
| ADH1B               | PRSS3               |
| DLK1                | IL20RA              |
| FGA                 | CLCA4               |
| C7                  | CYP24A1             |
| ALB                 | RAB27B              |
| FABP4               | BARX2               |
| GRIK2               | EPN3                |
| COL22A1             | PRSS8               |
| NRK                 | LAMA3               |
| FGG                 | SERPINB3            |
| TUSC5               | PKP2                |
| GSTM1               | LAMC2               |
| IGHV1-2             | COL17A1             |
| RBP4                | FGFR2               |
| APOA2               | FGFR3               |
| IGLV2-8             | PITX1               |
| DPP10               | HES2                |
| APOB                | ST6GALNAC1          |
| CR2                 | TP63                |
| IGHV3-7             | PPP2R2C             |
| TIMP4               | ATP12A              |
| MAGEA10             | CAMSAP3             |
| HP                  | NEBL                |
| GABRB3              | BPIFB2              |
| MME                 | PKP1                |
| RP11-5407.17        | GRHL2               |
| CHI3L1              | HAL                 |
| PPIAP29             | IGSF9               |
| RIMS2               | CEACAM6             |
| RP1-309122.2        | FAT2                |
| FCER2               | TMPRSS11E           |
| OGN                 | SULT2B1             |
| CNTN4               | SLC15A1             |
| ASPA                | TMEM40              |
| WT1-AS              | NOS1                |
| SOX11               | MYH7                |
| CTNNA2              | TGM1                |
| RP3-333A15.1        | GABRP               |
| AMBP                | KRT31               |
| MMP9                | DSP                 |
| PLIN1               | PLA2G3              |
| IGFBP1              | SLCSA1              |
| RP11-366L20.2       | KCNK10              |
| NLRP11              | FERMT1              |
| INHBB               | OLFM4               |
| DDIT4L              | HAS3                |
| FMN2                | ESRP2               |
| RP11-1220K2.2       | TGM5                |
| ZNF560              | RHOV                |
| RP11-475C16.1       | KLC3                |
| APOH                | EPHX3               |
| LINC01152           | CASP14              |
| AHSG                | SLC1A6              |
| PRG4                | CEACAM5             |
| TNFSF11             | CNFN                |
| SFRP4               | AGR2                |
| GATA4               | KRT23               |
| SYT14               | ALDH3A1             |
| LMO3                | FOXP1               |
| HS3ST5              | CWH43               |
| TMEM132D            | SCNN1A              |
| CDH15               | ENDOU               |
| ROBO2               | FZD10               |
| AC010970.2          | UNC93A              |
| C2orf70             | IRX4                |
| CBLN1               | UPK1B               |
| FGB                 | IL1A                |
| PCDHGA12            | ITGB6               |
| CNTN6               | IRF6                |
| CYSLTR2             | PPL                 |
| GFRA2               | TP53AIP1            |
| GABRB2              | CSTA                |
| FAM135B             | GJB6                |
| RPL41               | PI3                 |
| VAT1L               | SLPI                |
| UCLH1               | POF1B               |
| TMEM100             | LYPD3               |
| CDO1                | CXCL6               |
| LOXL4               | EREG                |

**RIC7 (stability 0.996)**

**GO:BP neg : 317 terms(FDR<0.01)**

| Term                                        | FDR      |
|---------------------------------------------|----------|
| cell-cell signaling                         | 2.11e-06 |
| cell communication                          | 2.18e-06 |
| single organism signaling                   | 3.42e-06 |
| signaling                                   | 3.42e-06 |
| multicellular organismal process            | 3.91e-06 |
| system process                              | 8.52e-06 |
| hormone transport                           | 9.24e-06 |
| signal release                              | 9.77e-06 |
| hormone secretion                           | 1.44e-05 |
| regulation of hormone levels                | 1.50e-05 |
| regulation of ion transport                 | 2.05e-05 |
| single-multicellular organism process       | 6.64e-05 |
| response to external stimulus               | 1.39e-04 |
| triglyceride metabolic process              | 3.22e-04 |
| regulation of biological quality            | 4.11e-04 |
| anatomical structure morphogenesis          | 4.70e-04 |
| regulation of hormone secretion             | 4.86e-04 |
| regulation of multicellular organismal p... | 4.86e-04 |
| regulation of system process                | 4.86e-04 |
| neurological system process                 | 4.86e-04 |

**GO:CC neg : 41 terms(FDR<0.01)**

| Term                       | FDR      |
|----------------------------|----------|
| extracellular space        | 3.67e-08 |
| neuron projection terminus | 2.75e-04 |
| synapse part               | 2.75e-04 |
| extracellular region       | 2.75e-04 |
| synapse                    | 3.97e-04 |
| blood microparticle        | 3.97e-04 |
| cell periphery             | 8.38e-04 |
| synaptic membrane          | 1.44e-03 |
| chylomicron                | 1.85e-03 |
| presynapse                 | 2.12e-03 |

**GO:MF neg : 23 terms(FDR<0.01)**

| Term                                        | FDR      |
|---------------------------------------------|----------|
| peptidase inhibitor activity                | 7.09e-03 |
| receptor binding                            | 7.09e-03 |
| receptor activity                           | 7.09e-03 |
| molecular transducer activity               | 7.09e-03 |
| endopeptidase inhibitor activity            | 7.13e-03 |
| signaling receptor activity                 | 7.87e-03 |
| endopeptidase regulator activity            | 8.59e-03 |
| high-density lipoprotein particle recept... | 1.18e-02 |
| peptidase regulator activity                | 2.42e-02 |
| signal transducer activity                  | 2.42e-02 |

**GO:BP pos : 165 terms(FDR<0.01)**

| Term                                        | FDR      |
|---------------------------------------------|----------|
| epidermis development                       | 1.50e-28 |
| keratinocyte differentiation                | 1.50e-28 |
| skin development                            | 1.50e-28 |
| epidermal cell differentiation              | 1.50e-28 |
| keratinization                              | 1.50e-28 |
| cornification                               | 1.50e-28 |
| epithelial cell differentiation             | 1.50e-28 |
| epithelium development                      | 1.50e-28 |
| tissue development                          | 1.50e-28 |
| peptide cross-linking                       | 1.50e-28 |
| multicellular organismal process            | 1.91e-20 |
| single-multicellular organism process       | 1.38e-18 |
| cell differentiation                        | 7.86e-16 |
| animal organ development                    | 2.15e-14 |
| anatomical structure development            | 2.26e-14 |
| system development                          | 2.26e-14 |
| cellular developmental process              | 2.39e-13 |
| establishment of skin barrier               | 4.51e-13 |
| cell-cell adhesion via plasma-membrane a... | 1.11e-12 |
| multicellular organism development          | 1.13e-12 |

**GO:CC pos : 49 terms(FDR<0.01)**

| Term                               | FDR      |
|------------------------------------|----------|
| cornified envelope                 | 9.17e-29 |
| extracellular region               | 9.17e-29 |
| extracellular space                | 1.22e-26 |
| cell periphery                     | 4.58e-26 |
| plasma membrane                    | 2.71e-25 |
| extracellular region part          | 6.11e-23 |
| intermediate filament              | 5.50e-14 |
| intermediate filament cytoskeleton | 1.01e-13 |
| plasma membrane part               | 4.48e-12 |
| desmosome                          | 4.95e-11 |

**GO:MF pos : 59 terms(FDR<0.01)**

| Term                                        | FDR      |
|---------------------------------------------|----------|
| structural molecule activity                | 3.86e-15 |
| serine-type endopeptidase inhibitor acti... | 8.73e-11 |
| calcium ion binding                         | 8.73e-11 |
| serine-type endopeptidase activity          | 1.82e-10 |
| serine-type peptidase activity              | 3.52e-10 |
| serine hydrolase activity                   | 5.37e-10 |
| endopeptidase inhibitor activity            | 9.81e-09 |
| peptidase inhibitor activity                | 2.04e-08 |
| endopeptidase regulator activity            | 2.72e-08 |
| structural constituent of epidermis         | 3.65e-07 |

**Cox regression:**  
logtest pv=8.9e-06  
LHR=1.13 (CI = 0.68, 1.58)

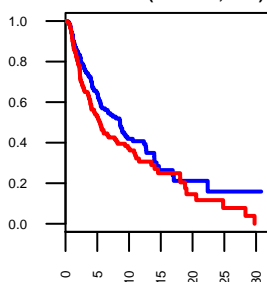

**SampleType**  
pv=3.5e-40

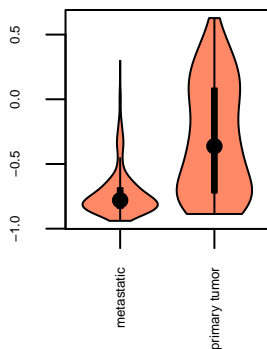

**factor**  
SampleType  
Cluster  
Dataset  
Gender

**p.value**  
3.46e-40  
1.02e-23  
1.40e-04  
1.46e-01

**Cluster**  
pv=1.0e-23

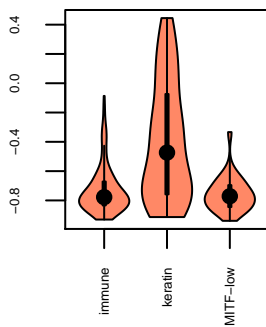

**Dataset**  
pv=1.4e-04

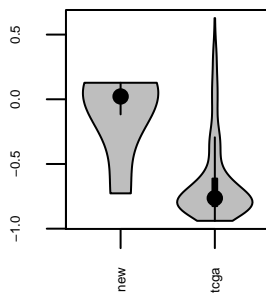

**Gender**  
pv=1.5e-01

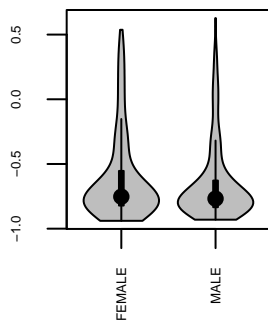

**Metagene**

(involvement of features)

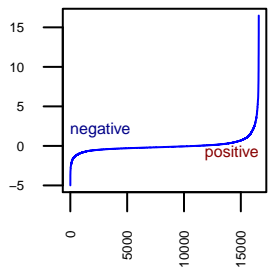

**571 negative**

**1296 positive**

- |               |           |
|---------------|-----------|
| SHISA3        | TNMD      |
| MT3           | HSPB6     |
| BMP7          | MEOX1     |
| MMP12         | SELE      |
| FOXF1         | SEMA3G    |
| FOXG1         | FMO1      |
| MAPK4         | MRC2      |
| SLAMF9        | SYT7      |
| MT1H          | DCN       |
| RP11-865I6.2  | LTF       |
| ESPN          | IL20RA    |
| FCGBP         | IGF1      |
| SIGLEC12      | IBSP      |
| NXPH4         | TLL1      |
| FAM163B       | VCAN      |
| PRIMA1        | ELN       |
| KCNG1         | PTGER3    |
| PEX5L         | CHRD2     |
| ESM1          | RIMBP2    |
| ISL1          | COL11A1   |
| REN           | WISP2     |
| OCA2          | SNCAIP    |
| FGF23         | COL17A1   |
| TF            | NGEF      |
| MARCO         | GAL       |
| ZIC2          | FGF10     |
| ART4          | CA12      |
| HHATL         | CAPN6     |
| PDE4C         | FBLN1     |
| INH4          | AMPH      |
| TCN1          | FAP       |
| CD5L          | ADCYAP1R1 |
| LINC01447     | RUNX1T1   |
| IGF2BP1       | PKP1      |
| COL22A1       | SERTAD4   |
| SERPINA5      | EPYC      |
| CYSLTR2       | PPEF1     |
| NCAM1         | ADAMTS2   |
| CP            | MMP2      |
| TCERG1L       | NID2      |
| FIBCD1        | CPXM1     |
| RP11-298D21.1 | TBX5      |
| ALAS2         | CCDC80    |
| PAGE5         | TBX15     |
| RXFP1         | MMP11     |
| CA9           | CTSG      |
| LRP2          | MMP9      |
| SERPINA3      | ISM1      |
| HAMP          | SYNDIG1   |
| PGBD5         | LIPG      |
| DNAH11        | MXRA5     |
| RDH8          | CHRD1     |
| NDRG1         | SRPX2     |
| IP6K3         | FGF14     |
| VEGFA         | HTR2A     |
| GRIN2B        | MEDAG     |
| CCL24         | ZNF423    |
| TOX3          | CRISPLD2  |
| RP11-320G24.1 | PDGFRL    |
| HBB           | STMN2     |
| FLRT3         | HAS1      |
| LINC00689     | COMP      |
| PLD5          | PTN       |
| CXCL5         | WNT2      |
| KCNQ2         | SFRP4     |
| CXCL8         | MEOX2     |
| SIGLEC11      | RARRES2   |
| CDH12         | OGN       |
| DPYSL5        | ASPN      |
| TNFRSF11B     | ECM2      |
| AK4           | CXCL12    |
| GP1BA         | EBF3      |
| PTGS2         | COL1A1    |
| S100A8        | TSPAN11   |
| SERPIN2       | ACSS3     |
| FGFBP2        | COL12A1   |
| FAM163A       | SIM1      |
| ZCCHC12       | SMOC2     |
| KEL           | PRPH2     |
| OR7C1         | LOX       |
| KRT8          | THBS4     |
| IL1R2         | PDGFRB    |

**RIC13 (stability 0.977)**

**GO:BP neg : 170 terms(FDR<0.01)**

| Term                                  | FDR      |
|---------------------------------------|----------|
| multicellular organismal process      | 5.41e-09 |
| single-multicellular organism process | 7.52e-08 |
| nervous system development            | 9.52e-07 |
| ion transport                         | 4.51e-06 |
| system development                    | 9.32e-06 |
| chemotaxis                            | 7.30e-05 |
| taxis                                 | 7.30e-05 |
| multicellular organism development    | 3.01e-04 |
| anion transport                       | 3.01e-04 |
| response to external stimulus         | 3.76e-04 |
| anatomical structure development      | 7.11e-04 |
| axonogenesis                          | 1.13e-03 |
| single-organism process               | 1.13e-03 |
| chemical homeostasis                  | 1.29e-03 |
| transmembrane transport               | 1.42e-03 |
| cellular ion homeostasis              | 1.42e-03 |
| developmental process                 | 1.42e-03 |
| neurogenesis                          | 1.42e-03 |
| axon guidance                         | 1.50e-03 |
| cellular chemical homeostasis         | 1.50e-03 |

**GO:CC neg : 23 terms(FDR<0.01)**

| Term                                   | FDR      |
|----------------------------------------|----------|
| intrinsic component of membrane        | 8.07e-09 |
| integral component of membrane         | 2.20e-08 |
| plasma membrane                        | 5.50e-08 |
| cell periphery                         | 5.50e-08 |
| extracellular space                    | 8.07e-08 |
| membrane part                          | 8.25e-07 |
| integral component of plasma membrane  | 8.90e-06 |
| intrinsic component of plasma membrane | 8.94e-06 |
| plasma membrane part                   | 5.91e-05 |
| neuron part                            | 2.02e-03 |

**GO:MF neg : 54 terms(FDR<0.01)**

| Term                                        | FDR      |
|---------------------------------------------|----------|
| transmembrane transporter activity          | 4.08e-05 |
| substrate-specific transmembrane transpo... | 4.08e-05 |
| substrate-specific transporter activity     | 1.12e-04 |
| transporter activity                        | 1.40e-04 |
| transmembrane receptor activity             | 1.42e-04 |
| ion transmembrane transporter activity      | 1.42e-04 |
| substrate-specific channel activity         | 1.42e-04 |
| carbohydrate binding                        | 1.42e-04 |
| receptor activity                           | 1.42e-04 |
| molecular transducer activity               | 1.42e-04 |

**GO:BP pos : 1037 terms(FDR<0.01)**

| Term                                        | FDR      |
|---------------------------------------------|----------|
| multicellular organismal process            | 1.67e-28 |
| single-multicellular organism process       | 1.67e-28 |
| extracellular matrix organization           | 1.67e-28 |
| extracellular structure organization        | 1.67e-28 |
| multicellular organism development          | 1.67e-28 |
| single-organism developmental process       | 1.67e-28 |
| anatomical structure development            | 1.67e-28 |
| developmental process                       | 1.67e-28 |
| system development                          | 1.67e-28 |
| anatomical structure morphogenesis          | 3.31e-27 |
| regulation of multicellular organismal p... | 2.19e-26 |
| animal organ development                    | 2.51e-26 |
| skeletal system development                 | 3.12e-25 |
| biological adhesion                         | 4.51e-25 |
| cell adhesion                               | 1.80e-24 |
| system process                              | 4.70e-24 |
| circulatory system development              | 6.63e-24 |
| multicellular organismal macromolecule m... | 1.42e-23 |
| vasculature development                     | 5.14e-23 |
| collagen metabolic process                  | 1.58e-22 |

**GO:CC pos : 78 terms(FDR<0.01)**

| Term                                   | FDR      |
|----------------------------------------|----------|
| proteinaceous extracellular matrix     | 3.67e-29 |
| extracellular matrix                   | 3.67e-29 |
| extracellular space                    | 3.67e-29 |
| extracellular region                   | 3.67e-29 |
| extracellular region part              | 3.67e-29 |
| cell periphery                         | 2.63e-25 |
| plasma membrane                        | 8.90e-25 |
| intrinsic component of plasma membrane | 1.01e-24 |
| integral component of plasma membrane  | 3.67e-24 |
| plasma membrane part                   | 7.70e-24 |

**GO:MF pos : 104 terms(FDR<0.01)**

| Term                                        | FDR      |
|---------------------------------------------|----------|
| receptor activity                           | 4.08e-25 |
| molecular transducer activity               | 4.08e-25 |
| transmembrane receptor activity             | 5.01e-22 |
| signaling receptor activity                 | 1.82e-21 |
| calcium ion binding                         | 6.01e-21 |
| transmembrane signaling receptor activit... | 6.58e-21 |
| glycosaminoglycan binding                   | 9.66e-19 |
| heparin binding                             | 9.66e-19 |
| sulfur compound binding                     | 1.72e-16 |
| extracellular matrix structural constitu... | 1.12e-15 |

**Cox regression:**  
logtest pv=3.3e-01  
LHR=0.35 (CI = -0.35, 1.04)

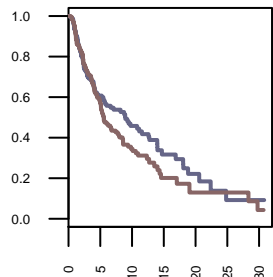

**Cluster**  
pv=1.5e-02

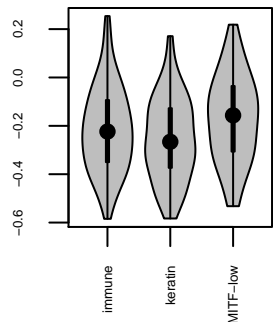

**factor**  
Cluster  
Gender  
SampleType  
Dataset

**p.value**  
1.46e-02  
2.72e-01  
4.35e-01  
9.88e-01

**Gender**  
pv=2.7e-01

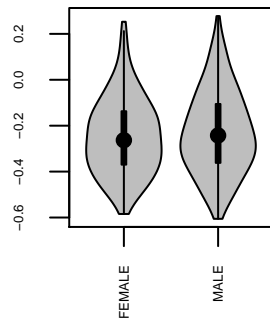

**SampleType**  
pv=4.4e-01

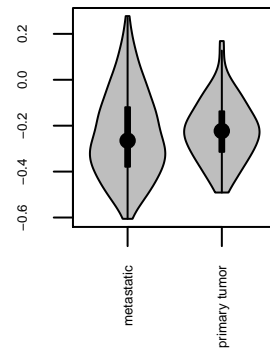

**Dataset**  
pv=9.9e-01

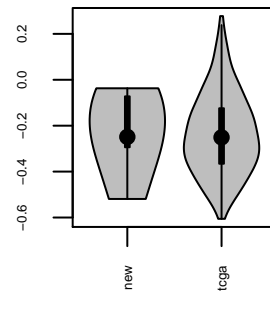



**Metagene**

(involvement of features)

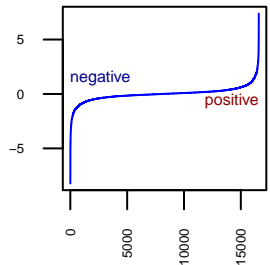

|                     |                     |
|---------------------|---------------------|
| <b>869 negative</b> | <b>780 positive</b> |
| CHST9               | WNT16               |
| PMEL                | ASB4                |
| CDH1                | TFAP2B              |
| PKLR                | ACPP                |
| TRPM1               | ZIC2                |
| DCT                 | ADRB1               |
| BCAN                | MAGEC2              |
| CST2                | ARHGAP6             |
| LG3                 | TRHDE               |
| FTLP14              | ACTN2               |
| RP11-429E11.2       | COL19A1             |
| RTN4RL1             | STR8IA5             |
| FAM69C              | PCYT1B              |
| RP11-348B17.1       | SRPX2               |
| EPHA5               | SFRP1               |
| LINC01443           | PTN                 |
| RDH8                | NPTX2               |
| LINC01531           | MEOX2               |
| TRIM63              | SOD3                |
| GJB2                | COL9A1              |
| MAGEL2              | WISP3               |
| SLC45A2             | PCDH2B              |
| MMP8                | DLX2                |
| LINC00282           | MUC5B               |
| SFRP5               | GRIA2               |
| CADPS               | ITH5                |
| PRKG2               | IL13RA2             |
| AQP4                | EDN3                |
| FAM196B             | OTOR                |
| GPR143              | MCHR1               |
| ADCY2               | HOXD11              |
| SV2B                | ANO3                |
| FXYD3               | DGKB                |
| POU3F1              | MYPN                |
| ACSBG1              | ABCA8               |
| RP11-84D1.2         | ITGA10              |
| PASD1               | TAGLN3              |
| GAPDH5              | HAPLN1              |
| TSPAN10             | GABRR1              |
| CDH3                | SYTL5               |
| TMEM215             | PPP1R1C             |
| CRTAC1              | GRIA4               |
| MLPH                | ABCA9               |
| LIN28A              | ABCA6               |
| PRSS33              | SLC24A2             |
| RP11-615I2.2        | ART3                |
| RAP1GAP             | LRRC52              |
| CST5                | SNED1               |
| NRG3                | XIRP2               |
| LINC01317           | SCRG1               |
| MLANA               | HNF4G               |
| ALDH3B2             | IL1RAPL1            |
| TUNAR               | NEGR1               |
| MAL                 | PCSK1               |
| TRIM58              | MRGPRX4             |
| CACNA1D             | MRGPRX3             |
| D4S234E             | PCDH9               |
| LRRTM1              | SLITRK6             |
| SFTPC               | FGF7P2              |
| ESRRG               | AGMO                |
| CHRN2               | RELN                |
| TKTL1               | MYBPC1              |
| RAB3B               | SLC30A10            |
| SNCB                | C6orf141            |
| AC006262.5          | RBM20               |
| KIT                 | VIT                 |
| IRX6                | MT1M                |
| PLEKHA6             | LINC00189           |
| UG0898H09           | AC012512.1          |
| ABCB5               | RP5-884M6.1         |
| ILDR2               | MEOX2-AS1           |
| CA14                | ERVMER61-1          |
| ADAMTS16            | LINC00326           |
| MBP                 | C5orf58             |
| ETNPPL              | LINC01239           |
| FAM167B             | GAPDHP14            |
| AFF3                | RP11-408N14.1       |
| RIPK4               | RP11-280O1.2        |
| GYG2                | FCGR2C              |
| CPEB1               | RP11-13A1.1         |
| NOV                 | CASC9               |
| CNDP1               | RP11-230G5.2        |

**RIC16 (stability 0.495)**

**GO:BP neg : 80 terms(FDR<0.01)**

| Term                                        | FDR      |
|---------------------------------------------|----------|
| multicellular organismal process            | 1.43e-07 |
| sensory perception                          | 1.43e-07 |
| system process                              | 7.02e-07 |
| neurological system process                 | 2.38e-05 |
| single-multicellular organism process       | 2.38e-05 |
| anatomical structure development            | 2.38e-05 |
| melanin biosynthetic process                | 4.30e-05 |
| melanin metabolic process                   | 7.14e-05 |
| developmental pigmentation                  | 8.85e-05 |
| secondary metabolite biosynthetic proces... | 1.04e-04 |
| phenol-containing compound metabolic pro... | 1.50e-04 |
| single-organism developmental process       | 1.50e-04 |
| system development                          | 1.85e-04 |
| developmental process                       | 2.04e-04 |
| multicellular organism development          | 2.11e-04 |
| nervous system development                  | 2.26e-04 |
| pigmentation                                | 9.73e-04 |
| organic hydroxy compound metabolic proce... | 1.17e-03 |
| cell-cell signaling                         | 1.19e-03 |
| visual perception                           | 1.20e-03 |

**GO:CC neg : 31 terms(FDR<0.01)**

| Term                            | FDR      |
|---------------------------------|----------|
| plasma membrane                 | 5.68e-11 |
| cell periphery                  | 8.34e-11 |
| plasma membrane part            | 2.32e-10 |
| plasma membrane region          | 1.92e-08 |
| intrinsic component of membrane | 3.45e-08 |
| membrane part                   | 1.47e-07 |
| integral component of membrane  | 2.09e-07 |
| melanosome membrane             | 8.35e-07 |
| chitosome                       | 8.35e-07 |
| extracellular space             | 1.34e-03 |

**GO:MF neg : 26 terms(FDR<0.01)**

| Term                                        | FDR      |
|---------------------------------------------|----------|
| transmembrane transporter activity          | 5.15e-04 |
| ion transmembrane transporter activity      | 6.30e-04 |
| channel activity                            | 6.30e-04 |
| passive transmembrane transporter activi... | 6.30e-04 |
| transporter activity                        | 6.30e-04 |
| substrate-specific transmembrane transpo... | 6.30e-04 |
| calcium ion binding                         | 6.75e-04 |
| cation transmembrane transporter activit... | 8.59e-04 |
| substrate-specific channel activity         | 1.43e-03 |
| ion channel activity                        | 2.40e-03 |

**GO:BP pos : 249 terms(FDR<0.01)**

| Term                                  | FDR      |
|---------------------------------------|----------|
| single-multicellular organism process | 5.34e-14 |
| multicellular organismal process      | 5.34e-14 |
| nervous system development            | 3.16e-13 |
| single-organism process               | 1.65e-12 |
| developmental process                 | 1.95e-11 |
| anatomical structure development      | 3.76e-11 |
| multicellular organism development    | 1.93e-10 |
| single-organism developmental process | 8.46e-10 |
| system development                    | 1.16e-09 |
| chemical synaptic transmission        | 1.16e-09 |
| anterograde trans-synaptic signaling  | 1.16e-09 |
| synaptic signaling                    | 1.16e-09 |
| trans-synaptic signaling              | 1.16e-09 |
| system process                        | 1.61e-09 |
| cell adhesion                         | 3.51e-09 |
| biological adhesion                   | 4.23e-09 |
| cell-cell signaling                   | 1.06e-08 |
| synapse organization                  | 1.25e-08 |
| cell communication                    | 2.53e-08 |
| single organism signaling             | 8.27e-08 |

**GO:CC pos : 48 terms(FDR<0.01)**

| Term                                   | FDR      |
|----------------------------------------|----------|
| plasma membrane                        | 8.62e-16 |
| cell periphery                         | 8.62e-16 |
| integral component of plasma membrane  | 1.47e-15 |
| intrinsic component of plasma membrane | 8.25e-15 |
| extracellular space                    | 9.16e-12 |
| intrinsic component of membrane        | 9.16e-12 |
| plasma membrane part                   | 2.23e-11 |
| integral component of membrane         | 7.79e-11 |
| membrane part                          | 2.24e-08 |
| proteinaceous extracellular matrix     | 4.22e-07 |

**GO:MF pos : 66 terms(FDR<0.01)**

| Term                                        | FDR      |
|---------------------------------------------|----------|
| receptor activity                           | 1.98e-06 |
| molecular transducer activity               | 1.98e-06 |
| signaling receptor activity                 | 1.98e-06 |
| transmembrane signaling receptor activit... | 1.98e-06 |
| transmembrane receptor activity             | 1.98e-06 |
| ion channel activity                        | 2.43e-06 |
| substrate-specific channel activity         | 3.25e-06 |
| calcium ion binding                         | 1.18e-05 |
| channel activity                            | 1.41e-05 |
| passive transmembrane transporter activi... | 1.41e-05 |

**Cox regression:**  
logtest pv=5.1e-04  
LHR=-1.60 (CI = -2.53, -0.66)

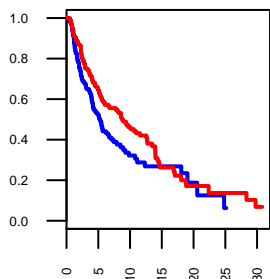

**Cluster**  
pv=7.7e-35

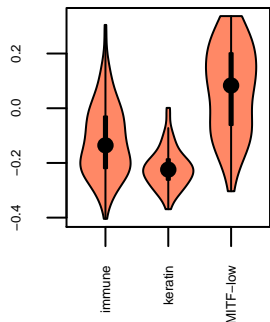

**factor**  
Cluster  
SampleType  
Gender  
Dataset

**p.value**  
7.75e-35  
1.12e-05  
6.39e-01  
6.76e-01

**SampleType**  
pv=1.1e-05

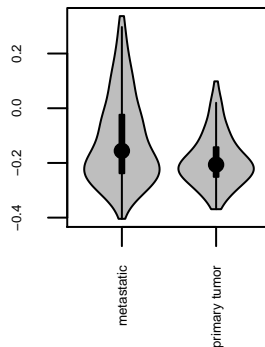

**Gender**  
pv=6.4e-01

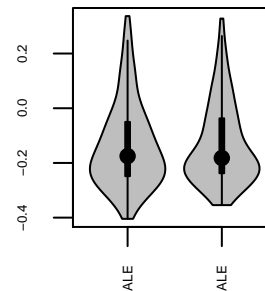

**Dataset**  
pv=6.8e-01

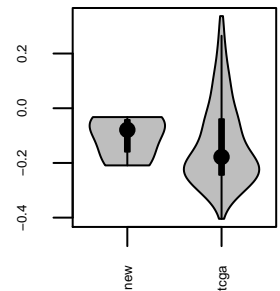

**Metagene**

(involvement of features)

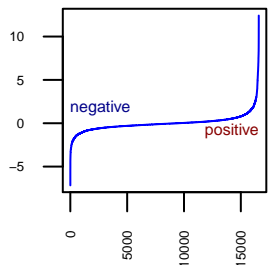

**459 negative**      **801 positive**

- |               |           |
|---------------|-----------|
| SPRR3         | KRT33A    |
| RP11-63E9.1   | TFAP2B    |
| BAAT          | LTF       |
| SPRR2A        | BARX2     |
| RP11-369C8.1  | GABRP     |
| VGf           | KRT31     |
| SPINK6        | SEZ6L     |
| LOXL4         | PNPLA5    |
| TMEM26        | CPNE6     |
| DEFB4A        | FA2H      |
| S100A12       | TOX3      |
| CBLN4         | KRT32     |
| COL11A2       | SULT1E1   |
| NMRK2         | SCGB2A2   |
| SFTPA1        | GPRC5D    |
| SULT1C2       | SLC27A6   |
| NPTX1         | SLC9A2    |
| OGDHL         | PRB2      |
| AL035610.1    | SPDEF     |
| PTPRD         | STATH     |
| FSTL5         | GFAP      |
| LINC00473     | CA6       |
| ONECUT2       | KRT34     |
| C10orf99      | KRT33B    |
| NEFL          | PPP1R1B   |
| S100A9        | GPR12     |
| PPP1R3C       | HMGCS2    |
| TMPRSS11D     | SAA2      |
| SYNPR         | CLDN10    |
| HTR3A         | MRAP2     |
| SNTG1         | KRT85     |
| IGFL1         | KRT7      |
| RP11-488I20.8 | PIK3C2G   |
| EPGN          | LGR5      |
| SLC35F1       | KRT71     |
| AC110781.3    | STAC2     |
| IGF2          | SLC25A48  |
| CYTL1         | AWAT2     |
| CCNYL2        | TRIM55    |
| CXCL17        | THrsp     |
| FMO3          | ADCY8     |
| S100A7A       | WIF1      |
| CFI           | SLC34A2   |
| EPYC          | TCHH      |
| SFTPA2        | PIP       |
| STK32B        | DCD       |
| DMGDH         | KRT82     |
| RP1-47M23.3   | ZG16B     |
| FRG2DP        | PM20D1    |
| DUOX1         | CLDN19    |
| BHMT2         | PH16      |
| RASL10B       | TRPV6     |
| RHCG          | CLDN3     |
| PPEF1         | MOGAT2    |
| RP11-218E20.3 | LMO1      |
| UNC80         | KLK1      |
| SERPINB4      | CTNND2    |
| LINC00654     | CST1      |
| PITX1         | KRT86     |
| FLJ16779      | KRT74     |
| IGKV5-2       | KRT83     |
| HOXA10        | KRT19     |
| RP11-706O15.3 | KRT15     |
| IGHD          | KRTAP4-4  |
| IL6           | KRT27     |
| S100A8        | MUCL1     |
| COL20A1       | ARPP21    |
| FUT3          | SAA1      |
| SPINK7        | KRT28     |
| EPDR1         | DSG4      |
| HOXA7         | DES       |
| LRRC4         | CALML5    |
| SCML4         | PSAPL1    |
| MMP13         | C5orf46   |
| LINC01314     | CCDC129   |
| PKHD1         | KRTAP9-7  |
| NLGN4X        | KRTAP11-1 |
| AC092652.1    | TCHHL1    |
| FOS           | KRTAP8-1  |
| MTRNR2L1      | B3GALT5   |
| KRT13         | SPRR4     |
| SFTPB         | DGAT2L6   |

**RIC19 (stability 0.924)**

**GO:BP neg : 87 terms(FDR<0.01)**

| Term                                        | FDR      |
|---------------------------------------------|----------|
| multicellular organism process              | 2.56e-07 |
| single-multicellular organism process       | 7.52e-07 |
| cornification                               | 1.40e-06 |
| tissue development                          | 1.20e-05 |
| response to corticosteroid                  | 1.01e-04 |
| keratinization                              | 1.01e-04 |
| anatomical structure development            | 1.01e-04 |
| negative regulation of endopeptidase act... | 1.01e-04 |
| system development                          | 1.01e-04 |
| response to glucocorticoid                  | 1.01e-04 |
| negative regulation of peptidase activit... | 1.27e-04 |
| regulation of endopeptidase activity        | 1.39e-04 |
| multicellular organism development          | 1.39e-04 |
| keratinocyte differentiation                | 1.40e-04 |
| epithelium development                      | 1.70e-04 |
| inflammatory response                       | 3.10e-04 |
| regulation of peptidase activity            | 3.76e-04 |
| peptide cross-linking                       | 3.76e-04 |
| single-organism process                     | 3.76e-04 |
| epidermal cell differentiation              | 3.76e-04 |

**GO:CC neg : 10 terms(FDR<0.01)**

| Term                               | FDR      |
|------------------------------------|----------|
| extracellular space                | 1.37e-18 |
| extracellular region               | 3.67e-11 |
| extracellular region part          | 2.75e-09 |
| extracellular matrix               | 1.83e-08 |
| cornified envelope                 | 6.42e-07 |
| proteinaceous extracellular matrix | 6.42e-07 |
| cell periphery                     | 7.33e-05 |
| plasma membrane                    | 8.48e-05 |
| intrinsic component of membrane    | 1.98e-02 |
| collagen trimer                    | 3.85e-02 |

**GO:MF neg : 15 terms(FDR<0.01)**

| Term                                        | FDR      |
|---------------------------------------------|----------|
| serine-type endopeptidase inhibitor acti... | 1.93e-05 |
| endopeptidase inhibitor activity            | 1.93e-05 |
| peptidase inhibitor activity                | 2.04e-05 |
| endopeptidase regulator activity            | 2.04e-05 |
| serine-type endopeptidase activity          | 2.83e-05 |
| receptor binding                            | 7.16e-05 |
| peptidase regulator activity                | 7.36e-05 |
| serine-type peptidase activity              | 1.40e-04 |
| serine hydrolase activity                   | 1.67e-04 |
| growth factor activity                      | 4.29e-04 |

**GO:BP pos : 51 terms(FDR<0.01)**

| Term                                  | FDR      |
|---------------------------------------|----------|
| keratinization                        | 1.88e-28 |
| keratinocyte differentiation          | 1.88e-28 |
| epidermis development                 | 1.88e-28 |
| skin development                      | 1.88e-28 |
| epidermal cell differentiation        | 1.88e-28 |
| epithelial cell differentiation       | 1.88e-28 |
| epithelium development                | 1.88e-28 |
| tissue development                    | 1.88e-28 |
| cornification                         | 1.84e-26 |
| multicellular organismal process      | 7.97e-24 |
| cell differentiation                  | 1.64e-18 |
| single-multicellular organism process | 1.88e-18 |
| animal organ development              | 3.12e-18 |
| system development                    | 5.26e-18 |
| cellular developmental process        | 7.72e-16 |
| anatomical structure development      | 3.20e-15 |
| multicellular organism development    | 4.60e-15 |
| developmental process                 | 2.84e-13 |
| single-organism developmental process | 5.38e-13 |
| molting cycle                         | 3.01e-10 |

**GO:CC pos : 27 terms(FDR<0.01)**

| Term                               | FDR      |
|------------------------------------|----------|
| intermediate filament              | 6.11e-29 |
| keratin filament                   | 6.11e-29 |
| intermediate filament cytoskeleton | 6.11e-29 |
| polymeric cytoskeletal fiber       | 8.25e-27 |
| supramolecular fiber               | 2.16e-25 |
| supramolecular polymer             | 3.93e-25 |
| supramolecular complex             | 3.93e-25 |
| extracellular space                | 1.05e-16 |
| extracellular region               | 2.65e-16 |
| extracellular region part          | 4.40e-08 |

**GO:MF pos : 17 terms(FDR<0.01)**

| Term                                | FDR      |
|-------------------------------------|----------|
| structural molecule activity        | 1.12e-05 |
| peptidase inhibitor activity        | 1.16e-03 |
| endopeptidase inhibitor activity    | 8.44e-03 |
| endopeptidase regulator activity    | 1.03e-02 |
| calcium ion binding                 | 1.03e-02 |
| peptidase regulator activity        | 1.93e-02 |
| enzyme inhibitor activity           | 2.27e-02 |
| neuropeptide receptor binding       | 2.90e-02 |
| hormone activity                    | 3.24e-02 |
| structural constituent of epidermis | 4.04e-02 |

**Cox regression:**  
logtest pv=4.0e-02  
LHR=1.30 (CI = 0.21, 2.40)

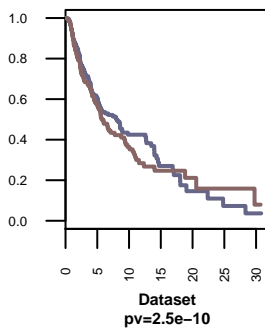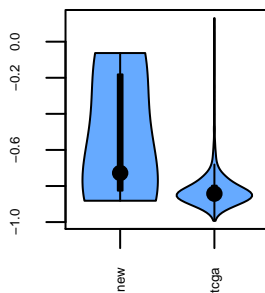

**factor**  
Dataset  
Cluster  
SampleType  
Gender

**p.value**  
2.47e-10  
8.19e-07  
1.57e-06  
8.07e-01

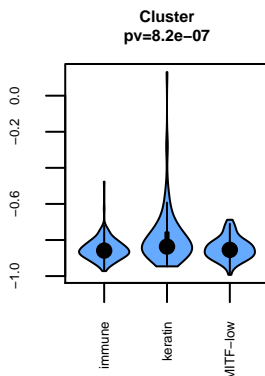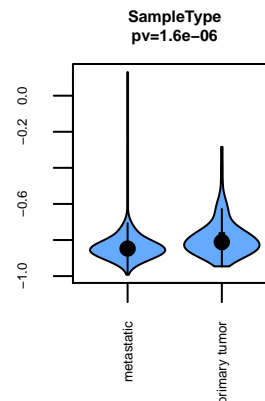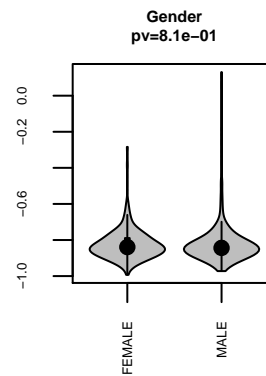

**Metagene**

(involvement of features)

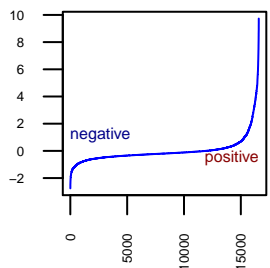

**373 negative**      **1466 positive**

- |                |          |
|----------------|----------|
| KLHL14         | FGR      |
| CSF3           | CD38     |
| CXCL5          | ITGAL    |
| ADRA1B         | TTC22    |
| CNTN1          | CEACAM21 |
| IGKV1D-39      | IL32     |
| IGKV1D-33      | TRAF3IP3 |
| PRSS50         | ETV7     |
| GABRB2         | CD4      |
| IGHV7-81       | TYROBP   |
| IGKV1-33       | ALOX5    |
| LY6K           | CD6      |
| IGKV1OR2-108   | WAS      |
| IGHV3-43       | MARCO    |
| FABP4          | CD74     |
| CDH15          | BIRC3    |
| IGHJ2          | TYMP     |
| NOG            | SLAMF7   |
| IGKV1D-27      | SH2D2A   |
| LINC00282      | TNFRSF1B |
| PRSS35         | MSR1     |
| HOXC12         | ADAM28   |
| IGHV1OR15-9    | BARX2    |
| RP11-488I20.8  | LCP2     |
| THBS4          | TNFRSF9  |
| AC108142.1     | TNIP3    |
| COCH           | LY75     |
| MAGEC1         | PARP12   |
| PRPH           | PRKCCQ   |
| DCX            | CD84     |
| ATP12A         | SPI1     |
| SCN7A          | DAPP1    |
| USH2A          | ACAP1    |
| CASQ2          | CD5L     |
| COLCA1         | TBX21    |
| IGKV2OR22-4    | IPCEF1   |
| RGS5           | ICAM3    |
| HOOK1          | APBB1IP  |
| BMX            | CST7     |
| DLX5           | P2RY10   |
| SERPINA9       | SP140    |
| TPSD1          | PTPRC    |
| OCLN           | LRP2     |
| GRIN2A         | FYB      |
| TSPEAR         | FCN1     |
| ABCA4          | PILRA    |
| ZNF215         | CASS4    |
| CYTL1          | SIGLEC1  |
| IGLV3-16       | SIRPG    |
| TSPEAR-AS1     | OAS1     |
| COL14A1        | LAG3     |
| RIMS2          | LYZ      |
| C20orf166-AS1  | CD209    |
| IGHV1OR15-2    | CECR1    |
| SHISA3         | TREM2    |
| SLC38A11       | IL12RB1  |
| AKR1C1         | CYTH4    |
| CTTNBP2        | LGALS2   |
| PTPRN          | APOL4    |
| TMEM132D       | APOL1    |
| RP11-284F21.10 | NCF4     |
| ADCYAP1R1      | CSF2RB   |
| IGKV1-39       | IL2RB    |
| SULT1C4        | GZMH     |
| PMP2           | GZMB     |
| GDF7           | SLA2     |
| DENND2A        | SIRPB1   |
| IGKV1D-43      | HCK      |
| IGKV1OR2-6     | SAMHD1   |
| SMCO3          | PPP1R16B |
| CHRD2          | TLR8     |
| REN            | CD40LG   |
| RP5-1198O20.4  | TNFSF13B |
| DNAJA4         | IRG1     |
| FRZB           | CORO1A   |
| RP11-284F21.9  | IL21R    |
| PDLIM3         | CD37     |
| LINC00707      | IL4I1    |
| TENM3          | LILRB1   |
| IGHE           | LILRA1   |
| CTSG           | RASAL3   |
| NGF            | EBI3     |

**RIC25 (stability 0.993)**

**GO:BP neg : 60 terms(FDR<0.01)**

| Term                                        | FDR      |
|---------------------------------------------|----------|
| multicellular organismal process            | 6.32e-08 |
| anatomical structure development            | 1.20e-07 |
| multicellular organism development          | 1.20e-07 |
| system development                          | 1.20e-07 |
| single-multicellular organism process       | 1.26e-07 |
| single-organism developmental process       | 1.35e-06 |
| cell differentiation                        | 2.79e-06 |
| developmental process                       | 3.38e-06 |
| cellular developmental process              | 1.67e-05 |
| animal organ development                    | 1.14e-04 |
| cell-cell signaling                         | 5.33e-04 |
| tissue development                          | 2.38e-03 |
| positive regulation of nervous system de... | 6.01e-03 |
| response to jasmonic acid                   | 6.01e-03 |
| cellular response to jasmonic acid stimu... | 6.01e-03 |
| regulation of hormone levels                | 9.02e-03 |
| nervous system development                  | 1.24e-02 |
| generation of neurons                       | 1.92e-02 |
| neurogenesis                                | 2.14e-02 |
| regulation of multicellular organismal p... | 2.86e-02 |

**GO:CC neg : 13 terms(FDR<0.01)**

| Term                                   | FDR      |
|----------------------------------------|----------|
| extracellular space                    | 2.38e-11 |
| extracellular region                   | 2.93e-09 |
| extracellular region part              | 2.38e-07 |
| proteinaceous extracellular matrix     | 1.80e-04 |
| extracellular matrix                   | 1.80e-04 |
| integral component of plasma membrane  | 1.56e-02 |
| plasma membrane part                   | 1.86e-02 |
| intrinsic component of plasma membrane | 2.75e-02 |
| ion channel complex                    | 3.12e-02 |
| transmembrane transporter complex      | 3.12e-02 |

**GO:MF neg : 6 terms(FDR<0.01)**

| Term                                        | FDR      |
|---------------------------------------------|----------|
| growth factor activity                      | 7.30e-06 |
| cytokine activity                           | 4.64e-03 |
| phenanthrene 9,10-monooxygenase activity    | 4.64e-03 |
| ketosteroid monooxygenase activity          | 4.64e-03 |
| trans-1,2-dihydrobenzene-1,2-diol dehydr... | 4.64e-03 |
| receptor binding                            | 1.15e-02 |

**GO:BP pos : 1358 terms(FDR<0.01)**

| Term                                        | FDR      |
|---------------------------------------------|----------|
| immune response                             | 1.71e-29 |
| immune system process                       | 1.71e-29 |
| defense response                            | 1.71e-29 |
| regulation of immune system process         | 1.71e-29 |
| innate immune response                      | 1.71e-29 |
| leukocyte activation                        | 1.71e-29 |
| regulation of immune response               | 1.71e-29 |
| cell activation                             | 1.71e-29 |
| positive regulation of immune system pro... | 1.71e-29 |
| lymphocyte activation                       | 1.71e-29 |
| immune effector process                     | 1.71e-29 |
| adaptive immune response                    | 1.71e-29 |
| T cell activation                           | 1.71e-29 |
| positive regulation of immune response      | 1.71e-29 |
| cytokine-mediated signaling pathway         | 1.71e-29 |
| regulation of leukocyte activation          | 1.71e-29 |
| inflammatory response                       | 1.71e-29 |
| regulation of cell activation               | 1.71e-29 |
| cellular response to cytokine stimulus      | 1.71e-29 |
| response to other organism                  | 1.71e-29 |

**GO:CC pos : 99 terms(FDR<0.01)**

| Term                                   | FDR      |
|----------------------------------------|----------|
| cell periphery                         | 2.04e-29 |
| plasma membrane                        | 2.04e-29 |
| plasma membrane part                   | 2.04e-29 |
| intrinsic component of membrane        | 2.04e-29 |
| intrinsic component of plasma membrane | 2.04e-29 |
| integral component of plasma membrane  | 2.04e-29 |
| integral component of membrane         | 2.04e-29 |
| membrane part                          | 2.04e-29 |
| side of membrane                       | 2.04e-29 |
| external side of plasma membrane       | 2.20e-27 |

**GO:MF pos : 117 terms(FDR<0.01)**

| Term                                        | FDR      |
|---------------------------------------------|----------|
| receptor activity                           | 7.16e-29 |
| molecular transducer activity               | 7.16e-29 |
| transmembrane receptor activity             | 7.16e-29 |
| transmembrane signaling receptor activit... | 7.16e-29 |
| signaling receptor activity                 | 7.16e-29 |
| signal transducer activity                  | 7.16e-29 |
| antigen binding                             | 7.36e-19 |
| cytokine receptor activity                  | 2.31e-14 |
| cytokine activity                           | 1.86e-12 |
| peptide antigen binding                     | 8.16e-12 |

**Cox regression:**  
logtest pv=2.8e-07  
LHR=-1.13 (CI = -1.57, -0.70)

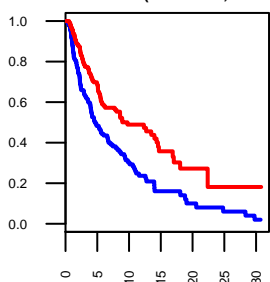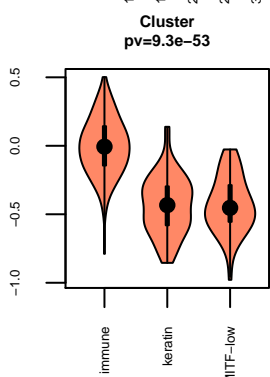

**factor**  
Cluster  
SampleType  
Dataset  
Gender

**p.value**  
9.33e-53  
4.37e-05  
2.24e-03  
9.44e-02

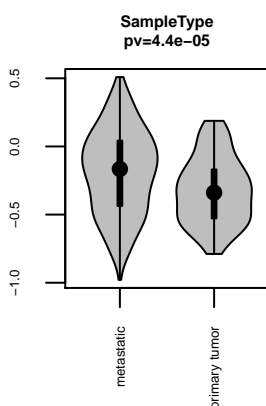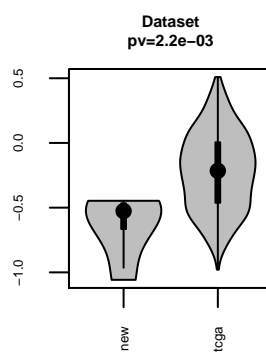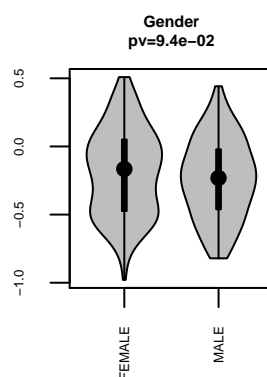

**Metagene**

(involvement of features)

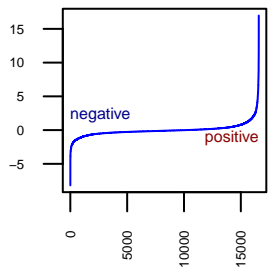

**714 negative**

COL11A1  
MMP13  
PRKG2  
EPYC  
HAPLN1  
MXRA5Y  
AMER2  
WISP2  
IBSP  
GJB2  
CYP11A1  
IRG1  
SIX2  
EGFL6  
GSTM1  
SOX1  
MT1H  
COL6A6  
SDC1  
WNT2  
MMP3  
TNFAIP6  
IFNG  
SFRP2  
CA12  
MEGF10  
GLDN  
DIO2  
SPATA18  
WT1  
WNT7B  
RP11-738O11.13  
GZMH  
GBP1P1  
AQP9  
MFAP2  
DCC  
DHRS2  
GBP7  
GPR84  
ITGBL1  
VSNL1  
ACOXL  
PTPRD  
PTK6  
WBSCR17  
CTAG2  
WT1-AS  
VSIG4  
CNTN6  
CDCP1  
WFDC2  
PAX1  
WIF1  
IGHG1  
EDIL3  
CCL8  
KCNK2  
CXCL3  
APLN  
MXRA5  
TIMP4  
KLK10  
MME  
F7  
NRG3  
ROR2  
ZIC1  
ANO5  
MUM1L1  
HTRA3  
FAM19A5  
SIM1  
MEG3  
ALX4  
GLRB  
FREM1  
XG  
CMTM5  
CCL4L1  
IGKC  
NALCN

**1177 positive**

MEOX1  
CD79B  
CD22  
LTF  
STAP1  
CP  
ELN  
NPFRR2  
PKP2  
LAMC2  
SNCAIP  
RASGRP2  
CAPN6  
CDH17  
COL4A4  
TCF7  
COL19A1  
P2RX5  
SLCO1A2  
MYBPC2  
ACHE  
FMO2  
GALNT16  
TCL1A  
SYNDIG1  
VSIG1  
CHRD1  
CD40LG  
CCL22  
FOXF1  
FCER2  
CLEC4M  
SHD  
CD79A  
GRIK5  
VIPR2  
CCL24  
MEOX2  
PTGDS  
SLC1A2  
ART4  
AICDA  
TREM2  
C7  
LIFR  
VIPR1  
CD207  
TNR  
PLA2G2D  
CR2  
LRMP  
BCL11A  
TNFSF11  
CLU  
DPPA4  
PAEP  
ITH5  
CHST8  
POF1B  
PACSIN1  
C3  
CCR7  
RGS13  
TSPAN8  
VPREB3  
TBC1D27  
LBP  
TNNT3  
NAPSB  
RAI2  
FCRL2  
ALDH3B2  
NTS  
TTC9  
DSC1  
ADAMTS8  
DTX1  
TESPA1  
EDAR  
STAB2  
BLK  
IL33

**RIC27 (stability 0.929)**

**GO:BP neg : 234 terms(FDR<0.01)**

| Term                                  | FDR      |
|---------------------------------------|----------|
| multicellular organism process        | 7.52e-14 |
| single-multicellular organism process | 1.65e-12 |
| multicellular organism development    | 4.76e-10 |
| chemokine-mediated signaling pathway  | 1.05e-09 |
| anatomical structure development      | 1.11e-09 |
| defense response                      | 1.78e-09 |
| single-organism developmental process | 3.01e-09 |
| developmental process                 | 3.76e-09 |
| system development                    | 5.85e-09 |
| single-organism process               | 2.11e-08 |
| neutrophil chemotaxis                 | 2.73e-08 |
| neutrophil migration                  | 1.25e-07 |
| leukocyte chemotaxis                  | 1.27e-07 |
| response to external stimulus         | 2.47e-07 |
| cell chemotaxis                       | 2.51e-07 |
| chemotaxis                            | 4.04e-07 |
| taxis                                 | 4.07e-07 |
| immune response                       | 4.84e-07 |
| inflammatory response                 | 6.01e-07 |
| granulocyte chemotaxis                | 1.20e-06 |

**GO:CC neg : 49 terms(FDR<0.01)**

| Term                                   | FDR      |
|----------------------------------------|----------|
| extracellular space                    | 6.78e-14 |
| extracellular region                   | 1.10e-12 |
| intrinsic component of membrane        | 3.67e-11 |
| proteinaceous extracellular matrix     | 1.05e-10 |
| plasma membrane part                   | 2.24e-10 |
| intrinsic component of plasma membrane | 2.29e-10 |
| collagen trimer                        | 2.29e-10 |
| integral component of plasma membrane  | 2.29e-10 |
| cell periphery                         | 4.48e-10 |
| plasma membrane                        | 6.97e-10 |

**GO:MF neg : 55 terms(FDR<0.01)**

| Term                               | FDR      |
|------------------------------------|----------|
| chemokine activity                 | 7.30e-11 |
| chemokine receptor binding         | 6.87e-09 |
| cytokine activity                  | 6.87e-09 |
| serine-type peptidase activity     | 7.84e-07 |
| serine hydrolase activity          | 9.45e-07 |
| receptor binding                   | 1.22e-06 |
| cytokine receptor binding          | 2.39e-06 |
| serine-type endopeptidase activity | 2.74e-06 |
| CXCR chemokine receptor binding    | 3.90e-06 |
| receptor activity                  | 3.90e-06 |

**GO:BP pos : 577 terms(FDR<0.01)**

| Term                                        | FDR      |
|---------------------------------------------|----------|
| signaling                                   | 9.02e-16 |
| single organism signaling                   | 9.02e-16 |
| multicellular organismal process            | 1.09e-15 |
| response to stimulus                        | 1.09e-15 |
| cell communication                          | 4.51e-15 |
| single-multicellular organism process       | 4.51e-15 |
| lymphocyte activation                       | 6.44e-14 |
| G-protein coupled receptor signaling pat... | 4.34e-13 |
| single-organism process                     | 4.34e-13 |
| adaptive immune response                    | 4.81e-13 |
| system process                              | 6.15e-13 |
| biological adhesion                         | 5.39e-12 |
| signal transduction                         | 6.36e-12 |
| cell adhesion                               | 7.09e-12 |
| immune system process                       | 1.70e-11 |
| lymphocyte differentiation                  | 1.97e-11 |
| immune response                             | 2.65e-11 |
| cell-cell adhesion                          | 4.34e-11 |
| regulation of multicellular organismal p... | 9.50e-11 |
| leukocyte proliferation                     | 4.29e-10 |

**GO:CC pos : 46 terms(FDR<0.01)**

| Term                                   | FDR      |
|----------------------------------------|----------|
| cell periphery                         | 3.06e-29 |
| plasma membrane                        | 3.06e-29 |
| plasma membrane part                   | 3.06e-29 |
| intrinsic component of membrane        | 3.06e-29 |
| membrane part                          | 3.06e-29 |
| integral component of membrane         | 3.06e-29 |
| intrinsic component of plasma membrane | 3.21e-27 |
| integral component of plasma membrane  | 3.21e-27 |
| extracellular space                    | 7.54e-17 |
| extracellular region                   | 3.30e-13 |

**GO:MF pos : 97 terms(FDR<0.01)**

| Term                                        | FDR      |
|---------------------------------------------|----------|
| receptor activity                           | 8.59e-29 |
| molecular transducer activity               | 8.59e-29 |
| signaling receptor activity                 | 8.59e-29 |
| transmembrane signaling receptor activit... | 8.59e-29 |
| transmembrane receptor activity             | 8.59e-29 |
| signal transducer activity                  | 2.22e-22 |
| G-protein coupled receptor activity         | 1.59e-12 |
| substrate-specific channel activity         | 2.52e-08 |
| channel activity                            | 3.18e-08 |
| passive transmembrane transporter activi... | 3.18e-08 |

**Cox regression:  
logtest pv=6.2e-02  
LHR=-0.76 (CI = -1.59, 0.06)**

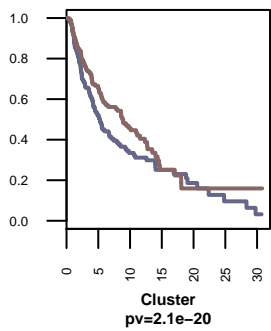

**factor**  
Cluster  
SampleType  
Dataset  
Gender

**p.value**  
2.12e-20  
5.53e-07  
5.38e-01  
9.41e-01

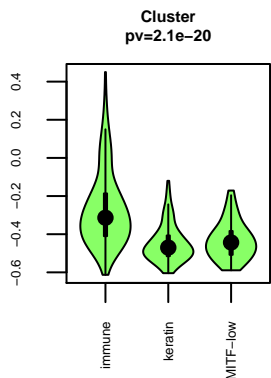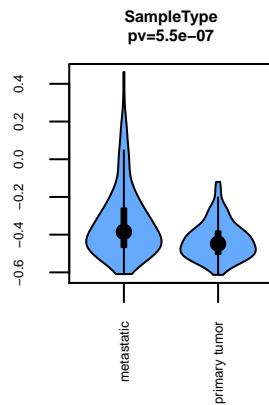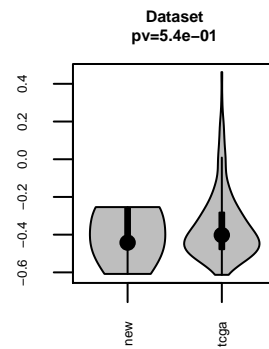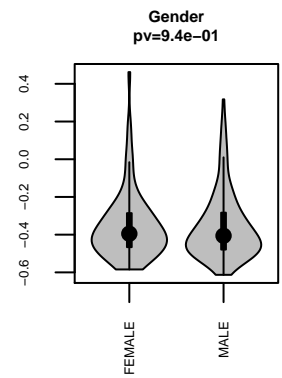

**Metagene**

(involvement of features)

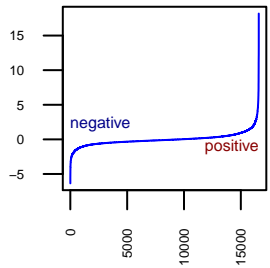

**393 negative**      **790 positive**

- |              |          |
|--------------|----------|
| KRT13        | SELE     |
| KRT4         | GPRC5A   |
| SIGLEC8      | SLC11A1  |
| C7           | MARCO    |
| SYT6         | BIRC3    |
| NRG3         | PTPRN    |
| RP6-24A23.7  | CHRDL2   |
| CXCR2P1      | LAMC2    |
| CDH7         | PAGE1    |
| CRNN         | PTGS2    |
| ZIC1         | CA12     |
| BTNL9        | CXCL2    |
| FLG2         | IL11     |
| SCGB3A1      | OSM      |
| SFRP4        | CCL22    |
| PSG4         | AQP9     |
| ZIC4         | HAS1     |
| RP6-24A23.3  | TFPI2    |
| IRS4         | SERPINE1 |
| LCE1A        | TYRP1    |
| TUBA3C       | DKK1     |
| KCNJ5        | CSF3     |
| TRIM67       | CCL2     |
| MSMB         | CCL8     |
| ALK          | ODAM     |
| ELFN1-AS1    | AREG     |
| SLC7A4       | WNT5A    |
| SEC14L6      | IL1A     |
| LHX2         | CCL20    |
| LPPR5        | MMP8     |
| SLC40A1      | G0S2     |
| ELFN2        | PI3      |
| GJA3         | TREM1    |
| PON3         | CXCL6    |
| DNASE2B      | EREG     |
| KRT1         | IL1B     |
| LINC01419    | FFAR2    |
| GSG1L        | LIF      |
| DGKI         | APOBEC3A |
| KLK2         | VEGF     |
| CUX2         | LBP      |
| PCSK2        | CHI3L1   |
| CLCA4        | SAA2     |
| NOVA1        | SLC19A3  |
| TMEM132E     | IL6      |
| LINC01579    | IL1RN    |
| AC012512.1   | IER3     |
| FMO2         | CH25H    |
| LRRC4B       | MYPN     |
| PLA2G4F      | GPR84    |
| CHIT1        | CYR61    |
| MUC21        | S100A8   |
| PODN         | NFKBIZ   |
| AC108142.1   | LCN2     |
| GRIK2        | PLEKHS1  |
| KLK4         | MMP3     |
| BPIFB2       | TDRD9    |
| LCE1B        | KCNJ15   |
| EBF2         | CD1A     |
| SLC30A10     | SLAMF9   |
| AC145110.1   | FCGR3B   |
| SLC5A4       | IL24     |
| PLA2G2D      | S100A9   |
| SPRR3        | S100A12  |
| LINC01021    | IGFN1    |
| OMD          | PTX3     |
| CBLN4        | CXCL3    |
| PHF21B       | CXCL5    |
| GRIK3        | CXCL1    |
| WT1          | S100P    |
| HCN1         | MMP10    |
| CDKN2A       | NNMT     |
| CHST8        | C15orf48 |
| CYP4B1       | GREM1    |
| RP11-94H18.1 | ANGPTL4  |
| DIRAS2       | CXCL8    |
| PPM1E        | FPR2     |
| LAMP5        | LRG1     |
| ITGAD        | SOSTDC1  |
| ST8SIA2      | KCNK3    |
| FAT3         | CCL11    |
| FRAS1        | SAA1     |

**RIC28 (stability 0.952)**

**GO:BP neg : 29 terms(FDR<0.01)**

| Term                                        | FDR      |
|---------------------------------------------|----------|
| peptide cross-linking                       | 4.21e-08 |
| skin development                            | 3.11e-04 |
| regulation of postsynaptic membrane pote... | 3.11e-04 |
| epidermal cell differentiation              | 5.41e-04 |
| keratinization                              | 5.41e-04 |
| epidermis development                       | 8.52e-04 |
| multicellular organismal process            | 9.88e-04 |
| multicellular organism development          | 1.39e-03 |
| excitatory postsynaptic potential           | 1.40e-03 |
| keratinocyte differentiation                | 1.65e-03 |
| single-multicellular organism process       | 1.88e-03 |
| anatomical structure development            | 1.88e-03 |
| chemical synaptic transmission, postsyna... | 3.47e-03 |
| system development                          | 3.54e-03 |
| neurological system process                 | 4.01e-03 |
| developmental process                       | 4.13e-03 |
| single-organism developmental process       | 7.08e-03 |
| nervous system development                  | 1.50e-02 |
| behavior                                    | 2.85e-02 |
| cornification                               | 3.76e-02 |

**GO:CC neg : 6 terms(FDR<0.01)**

| Term                               | FDR      |
|------------------------------------|----------|
| cornified envelope                 | 9.16e-06 |
| extracellular space                | 2.93e-04 |
| intrinsic component of membrane    | 8.71e-03 |
| extracellular region               | 8.71e-03 |
| proteinaceous extracellular matrix | 2.97e-02 |
| integral component of membrane     | 4.89e-02 |

**GO:MF neg : 0 terms(FDR<0.01)**

**GO:BP pos : 1021 terms(FDR<0.01)**

| Term                                     | FDR      |
|------------------------------------------|----------|
| inflammatory response                    | 5.01e-28 |
| defense response                         | 5.01e-28 |
| response to external stimulus            | 5.01e-28 |
| response to stimulus                     | 7.89e-24 |
| immune response                          | 9.52e-24 |
| immune system process                    | 9.52e-24 |
| response to chemical                     | 2.36e-21 |
| leukocyte migration                      | 1.26e-20 |
| response to bacterium                    | 2.17e-20 |
| multicellular organismal process         | 4.06e-20 |
| response to cytokine                     | 1.08e-18 |
| response to lipopolysaccharide           | 9.27e-18 |
| cell migration                           | 1.05e-17 |
| cell motility                            | 1.32e-17 |
| localization of cell                     | 1.32e-17 |
| response to molecule of bacterial origin | 1.32e-17 |
| locomotion                               | 4.09e-17 |
| response to other organism               | 4.09e-17 |
| response to external biotic stimulus     | 4.27e-17 |
| cell chemotaxis                          | 7.52e-17 |

**GO:CC pos : 48 terms(FDR<0.01)**

| Term                                   | FDR      |
|----------------------------------------|----------|
| extracellular space                    | 1.83e-28 |
| extracellular region                   | 8.52e-24 |
| extracellular region part              | 5.07e-16 |
| plasma membrane part                   | 5.50e-13 |
| plasma membrane                        | 1.28e-12 |
| cell periphery                         | 1.65e-12 |
| intrinsic component of plasma membrane | 6.81e-12 |
| integral component of plasma membrane  | 2.98e-11 |
| proteinaceous extracellular matrix     | 4.48e-11 |
| extracellular matrix                   | 1.67e-10 |

**GO:MF pos : 64 terms(FDR<0.01)**

| Term                               | FDR      |
|------------------------------------|----------|
| cytokine activity                  | 3.65e-23 |
| receptor binding                   | 3.01e-18 |
| receptor activity                  | 7.94e-14 |
| molecular transducer activity      | 7.94e-14 |
| growth factor activity             | 1.29e-13 |
| cytokine receptor binding          | 4.94e-13 |
| chemokine activity                 | 9.20e-11 |
| chemokine receptor binding         | 1.02e-09 |
| G-protein coupled receptor binding | 1.38e-09 |
| signaling receptor activity        | 1.50e-09 |

**Cox regression:**  
logtest pv=1.9e-01  
LHR=-0.74 (CI = -1.84, 0.37)

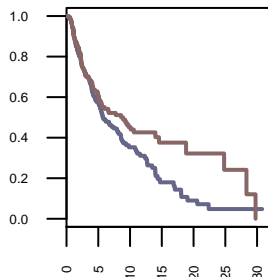

**SampleType**  
pv=1.6e-06

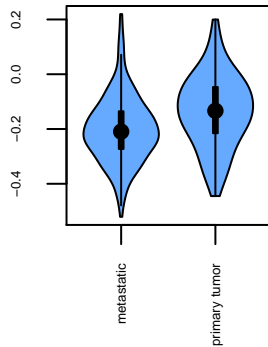

**factor**  
SampleType  
Gender  
Dataset  
Cluster

**p.value**  
1.61e-06  
2.43e-01  
6.16e-01  
6.90e-01

**Gender**  
pv=2.4e-01

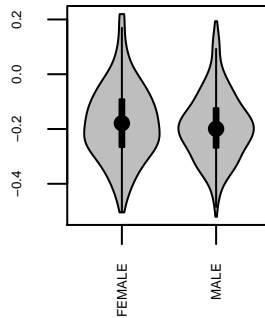

**Dataset**  
pv=6.2e-01

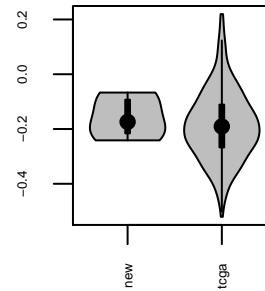

**Cluster**  
pv=6.9e-01

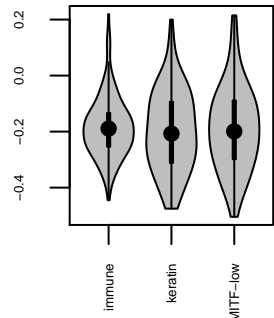

**Metagene**

(involvement of features)

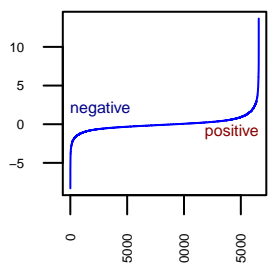

|                     |                     |
|---------------------|---------------------|
| <b>397 negative</b> | <b>772 positive</b> |
| SPRR3               | TNMD                |
| OLIG2               | PRSS22              |
| CRNN                | DNAH5               |
| KRT13               | ROS1                |
| SPRR2A              | PRSS8               |
| KRT6A               | CAPN6               |
| KRT6C               | GRHL2               |
| NR5A1               | CEACAM6             |
| MAT1A               | PGC                 |
| SPRR2D              | MSLN                |
| TLX1                | ESRP2               |
| SPRR2E              | AGR2                |
| CNTNAP5             | FOLR1               |
| A2ML1               | SCNN1A              |
| KRT16               | ITGB6               |
| LBP                 | EPCAM               |
| KIF25-AS1           | SFTPA1              |
| CLCA4               | C4BPA               |
| SPRR1B              | SLPI                |
| PRKG2               | ATP13A4             |
| CMTM5               | AP1M2               |
| COL20A1             | CRB3                |
| SPRR1A              | NAPSA               |
| CKM                 | RAB25               |
| RP11-513O17.2       | VSTM2L              |
| JPH4                | SFTPD               |
| UG0898H09           | KRT7                |
| KRT14               | NKX2-1              |
| DSG3                | MMP7                |
| KRT4                | ANXA3               |
| CHL1-AS2            | CYP4B1              |
| LINC01198           | MAGEA4              |
| FABP7               | SCGB1A1             |
| SV2A                | TMEM132D            |
| LINC01235           | SLC34A2             |
| PTPRZ1              | PAGE5               |
| ZNF648              | LAD1                |
| SLC30A3             | SCGB3A1             |
| ITPR1P1             | AQP5                |
| CCDC26              | CCDC64B             |
| CD5L                | PDZK11P1            |
| SLC38A8             | PIGR                |
| TMPRSS11A           | ELF3                |
| DDX25               | SCGB3A2             |
| LY6D                | GRIK2               |
| RP3-323A16.1        | HCN1                |
| FXYD7               | CHMP4C              |
| SLCO1A2             | CLDN3               |
| LINC01502           | SCNN1G              |
| SPESP1              | ELFN2               |
| SPATA31C2           | KLK11               |
| TSPEAR-AS1          | SCNN1B              |
| NTS                 | SFTPC               |
| ADAMTS4             | FSTL5               |
| KCNJ10              | SFTPB               |
| MOG                 | IRX2                |
| NKX2-2              | SDR16C5             |
| CALML3              | SOSTDC1             |
| PAGE1               | KNDC1               |
| RP1-40E16.9         | AQP4                |
| KRT78               | SLC26A9             |
| SBSN                | CD164L2             |
| OLIG1               | CST6                |
| F5                  | KDF1                |
| BMX                 | MAPK15              |
| MYH7                | C1orf116            |
| GRIN2B              | SLITRK6             |
| KRT5                | SFTPA2              |
| LIN28B              | C5orf38             |
| LINC01317           | DMBT1               |
| TRIM58              | CLDN4               |
| RP11-476K15.1       | CXCL17              |
| SPRR2F              | CTSE                |
| FAM101A             | KRT16P2             |
| MCHR1               | SFTA3               |
| HIST1H2AG           | CYP2B7P             |
| DPY19L2             | SLC22A31            |
| JAKMIP2             | RP11-488I20.9       |
| SPDYC               | SLC6A14             |
| CLGN                | RAB27B              |
| CPB1                | CLDN18              |
| FAM198A             | TSPAN1              |

**RIC31 (stability 0.913)**

**GO:BP neg : 29 terms(FDR<0.01)**

| Term                                  | FDR      |
|---------------------------------------|----------|
| cornification                         | 4.06e-15 |
| keratinization                        | 1.43e-10 |
| keratinocyte differentiation          | 4.71e-09 |
| multicellular organismal process      | 2.22e-08 |
| epidermal cell differentiation        | 1.14e-07 |
| single-multicellular organism process | 3.76e-07 |
| skin development                      | 7.71e-07 |
| multicellular organism development    | 7.71e-07 |
| system development                    | 1.10e-06 |
| epidermis development                 | 4.96e-06 |
| anatomical structure development      | 9.90e-06 |
| peptide cross-linking                 | 9.90e-06 |
| single-organism developmental process | 6.36e-05 |
| developmental process                 | 1.00e-04 |
| cell differentiation                  | 1.00e-04 |
| animal organ development              | 2.73e-04 |
| epithelial cell differentiation       | 3.27e-04 |
| cellular developmental process        | 6.52e-04 |
| tissue development                    | 3.17e-03 |
| single-organism cellular process      | 5.08e-03 |

**GO:CC neg : 10 terms(FDR<0.01)**

| Term                                   | FDR      |
|----------------------------------------|----------|
| cornified envelope                     | 2.02e-09 |
| extracellular region                   | 1.01e-05 |
| cell periphery                         | 1.04e-03 |
| extracellular region part              | 2.02e-03 |
| extracellular space                    | 3.15e-03 |
| plasma membrane                        | 4.58e-03 |
| integral component of plasma membrane  | 1.18e-02 |
| plasma membrane part                   | 2.44e-02 |
| intrinsic component of plasma membrane | 2.44e-02 |
| keratin filament                       | 4.95e-02 |

**GO:MF neg : 1 terms(FDR<0.01)**

| Term                         | FDR      |
|------------------------------|----------|
| structural molecule activity | 2.36e-02 |

**GO:BP pos : 193 terms(FDR<0.01)**

| Term                                  | FDR      |
|---------------------------------------|----------|
| epithelial cell differentiation       | 1.28e-17 |
| epidermis development                 | 2.00e-15 |
| epithelium development                | 2.00e-15 |
| skin development                      | 5.64e-15 |
| tissue development                    | 6.32e-15 |
| multicellular organismal process      | 1.15e-11 |
| keratinocyte differentiation          | 9.02e-11 |
| single-multicellular organism process | 1.42e-10 |
| keratinization                        | 1.42e-10 |
| epidermal cell differentiation        | 1.80e-10 |
| animal organ development              | 5.06e-09 |
| cornification                         | 3.63e-08 |
| anatomical structure development      | 5.78e-08 |
| multicellular organism development    | 1.07e-07 |
| system development                    | 1.60e-07 |
| peptide cross-linking                 | 3.20e-07 |
| pattern specification process         | 7.43e-07 |
| single-organism developmental process | 1.11e-06 |
| single-organism process               | 1.11e-06 |
| developmental process                 | 1.58e-06 |

**GO:CC pos : 82 terms(FDR<0.01)**

| Term                                   | FDR      |
|----------------------------------------|----------|
| extracellular region                   | 1.50e-16 |
| cell periphery                         | 1.47e-15 |
| plasma membrane                        | 1.10e-14 |
| extracellular space                    | 2.84e-14 |
| plasma membrane part                   | 6.60e-12 |
| cornified envelope                     | 1.74e-10 |
| extracellular region part              | 2.07e-10 |
| intrinsic component of plasma membrane | 4.35e-10 |
| integral component of plasma membrane  | 1.96e-09 |
| intrinsic component of membrane        | 3.48e-09 |

**GO:MF pos : 40 terms(FDR<0.01)**

| Term                                        | FDR      |
|---------------------------------------------|----------|
| receptor activity                           | 1.87e-08 |
| molecular transducer activity               | 1.87e-08 |
| transmembrane receptor activity             | 1.72e-07 |
| transmembrane signaling receptor activit... | 2.79e-05 |
| signaling receptor activity                 | 5.41e-05 |
| endopeptidase inhibitor activity            | 3.72e-04 |
| peptidase inhibitor activity                | 5.40e-04 |
| endopeptidase regulator activity            | 5.90e-04 |
| G-protein coupled receptor activity         | 6.68e-04 |
| structural molecule activity                | 1.42e-03 |

**Cox regression:**  
logtest pv=2.2e-02  
LHR=1.27 (CI = 0.26, 2.28)

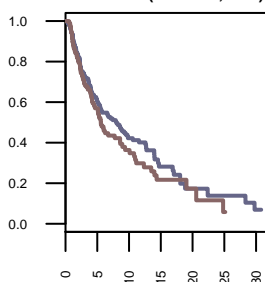

**SampleType**  
pv=6.1e-18

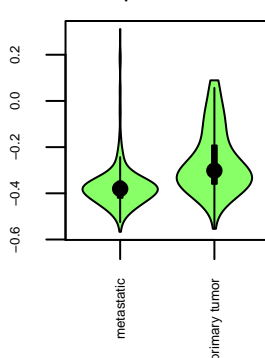

**factor**  
SampleType  
Cluster  
Dataset  
Gender

**p.value**  
6.15e-18  
3.08e-17  
2.44e-04  
2.28e-01

**Cluster**  
pv=3.1e-17

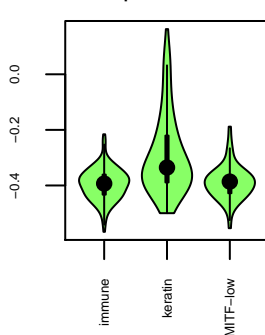

**Dataset**  
pv=2.4e-04

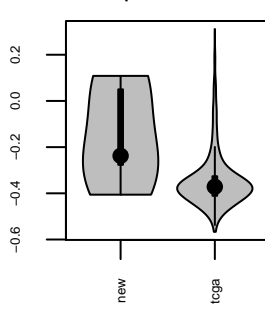

**Gender**  
pv=2.3e-01

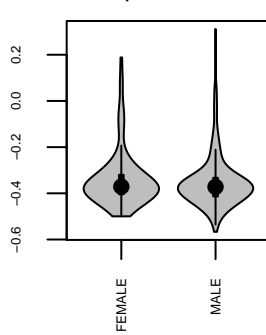

**Metagene**

(involvement of features)

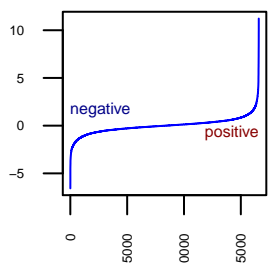

**375 negative**      **392 positive**

- |               |               |
|---------------|---------------|
| CSMD1         | OAS1          |
| NRTN          | DDX58         |
| GATA4         | OAS3          |
| PRKG2         | OAS2          |
| HPGD          | IFIH1         |
| DPP10         | IFIT3         |
| MYOM2         | IFIT2         |
| CPN1          | IFI6          |
| KIAA1456      | BST2          |
| RP11-599J14.2 | XAF1          |
| BAI1          | RSAD2         |
| DPP10-AS1     | CMPK2         |
| RP11-252C15.1 | TCN1          |
| TNFRSF10B     | OASL          |
| RP11-317N12.1 | DDX60         |
| RP13-735L24.1 | IFI44L        |
| NEFM          | IFI44         |
| MYT1          | HERC6         |
| LINC00221     | HERC5         |
| LONRF1        | GFRA3         |
| NELL1         | LGSN          |
| C8orf48       | MX1           |
| EPHX2         | IFI27         |
| CHIT1         | DDX60L        |
| KBTD11        | MX2           |
| RNF175        | USP18         |
| SLC18A1       | IRF7          |
| SLC7A2        | IFIT1         |
| DUSP4         | IFITM1        |
| BAAT          | ISG15         |
| HR            | RP11-197K6.1  |
| CLN8          | HELZ2         |
| CYTL1         | SAMD9L        |
| NEIL2         | LINC00462     |
| CTB-36O1.7    | LRRTM1        |
| LINC01447     | RP11-119J18.1 |
| DPYSL5        | BANCR         |
| CD1E          | ANGPTL7       |
| OPRD1         | SLC25A48      |
| FRG2DP        | COL2A1        |
| LIN28A        | NRXN3         |
| HLA-DQB1-AS1  | MYEOV         |
| CTD-3006G17.2 | EPST11        |
| LINC00681     | PARP9         |
| AQP4          | GBP1P1        |
| CDO1          | CCNYL2        |
| ASAH1         | TTC39A        |
| DSCR8         | RNF128        |
| D4S234E       | DHX58         |
| DCLK1         | LINC01426     |
| CSPG4         | APOBEC3A      |
| DLC1          | CXCL11        |
| MTMR7         | IFITM3        |
| RP11-734I18.1 | POU4F1        |
| LGI3          | DTX3L         |
| MAGEA1        | TRIM22        |
| PNMA2         | PARP12        |
| PRR9          | CTD-2521M24.9 |
| RP11-582J16.5 | ASB11         |
| CHST9         | PARP14        |
| RP11-182J1.14 | IGF2BP1       |
| UBXN8         | STEAP1B       |
| ATP6V1B2      | SAMD9         |
| PEG3          | UBE2L6        |
| DSCAML1       | PAGE5         |
| BIN3          | GRIN2B        |
| STAR          | ZNF560        |
| AC110781.3    | RP11-588H23.3 |
| HBA2          | RTP4          |
| PBK           | RP11-231N3.1  |
| HS3ST5        | TMEM255A      |
| PRSS56        | NKX2-5        |
| CLDN11        | BATF2         |
| RP11-796A5.3  | LRRTM4        |
| EGR3          | DAPL1         |
| GRM7          | CST2          |
| C5orf17       | IFI35         |
| LIN28B        | CCL8          |
| GPAT2         | SP110         |
| WT1           | PSMB9         |
| CTD-2336O2.1  | PTPRU         |
| LZTS1         | AP000593.7    |

**RIC37 (stability 0.760)**

**GO:BP neg : 0 terms(FDR<0.01)**

**GO:CC neg : 19 terms(FDR<0.01)**

- |                                        |            |
|----------------------------------------|------------|
| <b>Term</b>                            | <b>FDR</b> |
| plasma membrane part                   | 5.87e-03   |
| integral component of membrane         | 5.87e-03   |
| intrinsic component of membrane        | 5.87e-03   |
| intrinsic component of plasma membrane | 7.79e-03   |
| integral component of plasma membrane  | 1.06e-02   |
| plasma membrane                        | 1.44e-02   |
| cell periphery                         | 1.44e-02   |
| postsynapse                            | 1.54e-02   |
| neurofibrillary tangle                 | 1.77e-02   |
| membrane part                          | 1.80e-02   |

**GO:MF neg : 5 terms(FDR<0.01)**

- |                                             |            |
|---------------------------------------------|------------|
| <b>Term</b>                                 | <b>FDR</b> |
| receptor activity                           | 3.65e-04   |
| molecular transducer activity               | 3.65e-04   |
| transmembrane signaling receptor activit... | 1.61e-03   |
| transmembrane receptor activity             | 1.61e-03   |
| signaling receptor activity                 | 3.26e-03   |

**GO:BP pos : 132 terms(FDR<0.01)**

- |                                             |            |
|---------------------------------------------|------------|
| <b>Term</b>                                 | <b>FDR</b> |
| response to type I interferon               | 5.01e-28   |
| type I interferon signaling pathway         | 5.01e-28   |
| cellular response to type I interferon      | 5.01e-28   |
| defense response to virus                   | 2.67e-22   |
| defense response to other organism          | 2.47e-21   |
| defense response                            | 1.33e-19   |
| response to virus                           | 3.01e-19   |
| cytokine-mediated signaling pathway         | 1.84e-18   |
| innate immune response                      | 2.51e-17   |
| response to cytokine                        | 3.31e-17   |
| response to interferon-gamma                | 7.79e-17   |
| cellular response to cytokine stimulus      | 1.88e-16   |
| interferon-gamma-mediated signaling path... | 9.02e-15   |
| response to other organism                  | 3.11e-14   |
| response to external biotic stimulus        | 3.11e-14   |
| response to biotic stimulus                 | 2.73e-13   |
| cellular response to interferon-gamma       | 2.83e-13   |
| negative regulation of viral genome repl... | 9.19e-13   |
| negative regulation of viral process        | 1.19e-12   |
| negative regulation of viral life cycle     | 1.73e-12   |

**GO:CC pos : 8 terms(FDR<0.01)**

- |                                             |            |
|---------------------------------------------|------------|
| <b>Term</b>                                 | <b>FDR</b> |
| MHC class I protein complex                 | 4.22e-06   |
| nucleosome                                  | 6.05e-04   |
| DNA packaging complex                       | 1.71e-03   |
| MHC protein complex                         | 2.20e-03   |
| extracellular region                        | 1.06e-02   |
| phagocytic vesicle membrane                 | 2.44e-02   |
| integral component of luminal side of en... | 3.44e-02   |
| luminal side of endoplasmic reticulum me... | 3.44e-02   |

**GO:MF pos : 19 terms(FDR<0.01)**

- |                                             |            |
|---------------------------------------------|------------|
| <b>Term</b>                                 | <b>FDR</b> |
| transmitter-gated ion channel activity      | 9.02e-04   |
| transmitter-gated channel activity          | 9.02e-04   |
| double-stranded RNA binding                 | 9.02e-04   |
| peptide antigen binding                     | 6.23e-03   |
| 2'-5'-oligoadenylate synthetase activity    | 7.36e-03   |
| extracellular ligand-gated ion channel a... | 7.36e-03   |
| neurotransmitter receptor activity          | 7.36e-03   |
| ionotropic glutamate receptor activity      | 8.59e-03   |
| extracellular-glutamate-gated ion channe... | 8.59e-03   |
| TAP binding                                 | 1.60e-02   |

**Cox regression:**  
logtest pv=4.5e-01  
LHR=-0.69 (CI = -2.46, 1.09)

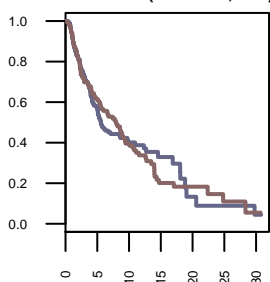

**Dataset**  
pv=5.0e-06

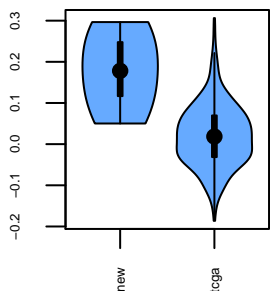

**factor**  
Dataset  
SampleType  
Cluster  
Gender

**p.value**  
4.96e-06  
4.12e-04  
3.29e-01  
5.17e-01

**SampleType**  
pv=4.1e-04

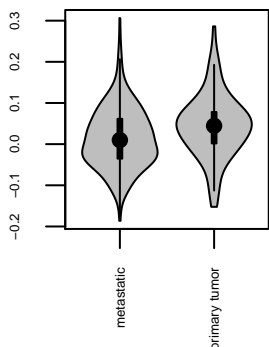

**Cluster**  
pv=3.3e-01

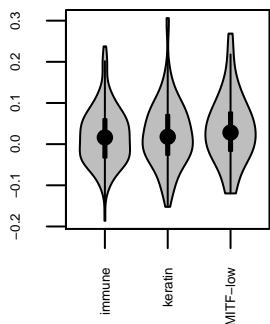

**Gender**  
pv=5.2e-01

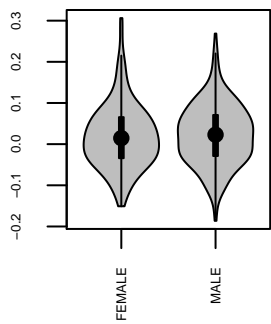

**Metagene**

(involvement of features)

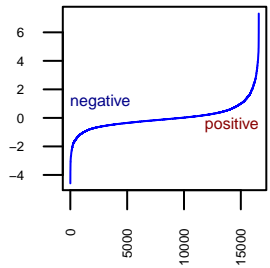

**295 negative**

**912 positive**

- |               |           |
|---------------|-----------|
| CNTN3         | MYOC      |
| TFAP2B        | FLT4      |
| LINC01317     | ANO2      |
| SEMA3E        | TIE1      |
| ENTHD1        | GPR116    |
| PLA2G2A       | MRV11     |
| LINC01563     | FOLH1     |
| RNF182        | ANGPT2    |
| LRRC15        | VWF       |
| PSAT1         | MGP       |
| BANCR         | SMOC2     |
| CNR1          | CDH6      |
| SHC4          | MYCT1     |
| ACTN2         | COL21A1   |
| ATP8A2        | CTAG2     |
| FDCSP         | F2RL3     |
| NMRK2         | DLL4      |
| RP11-438B23.2 | CNN1      |
| MMP13         | NGF       |
| FXYD7         | RRER      |
| RP5-884M6.1   | TRPC6     |
| KLF14         | ENPEP     |
| GFRA1         | TINAGL1   |
| MDGA2         | HAPLN1    |
| PCK1          | CXorf36   |
| FHAD1         | PAMR1     |
| MAGEA11       | ESAM      |
| ADCY2         | JPH2      |
| RP4-718J7.4   | SPARCL1   |
| SOX9          | ROBO4     |
| AC009784.3    | SLC6A1    |
| ACTBP8        | ACAN      |
| RFPL2         | FRZB      |
| RNLS          | ACTG2     |
| UGT2B7        | INHBB     |
| SOX9-AS1      | LMOD1     |
| CILP          | DCLK3     |
| PNLIPRP3      | HEYL      |
| NTNG1         | ESM1      |
| ESRRB         | AVPR1A    |
| POU3F3        | PPP1R14A  |
| CD109         | SDPR      |
| MIR4697HG     | NPNT      |
| CXCL14        | GPRC5C    |
| SLC13A3       | APLN      |
| PLEKHS1       | CD34      |
| GS1-309P15.2  | CLEC14A   |
| TRPM1         | MKRN3     |
| AIM2          | CDH5      |
| FABP6         | CLDN5     |
| BCL2A1        | NDUFA4L2  |
| CRB1          | GABRD     |
| WISP2         | PEAR1     |
| OTOR          | HBA2      |
| B4GALNT4      | NRARP     |
| FRMD5         | LRRC10B   |
| RP11-348B17.1 | OLIG2     |
| LTK           | EBF2      |
| GRIN2A        | TMEM233   |
| NLRP11        | HBB       |
| RP11-63E9.1   | GPIHBP1   |
| GPR158        | CALCRL    |
| PCLO          | ABCC9     |
| RP11-347E10.1 | PLVAP     |
| GRIK2         | MAPK4     |
| SFRP2         | FOXC2     |
| IGSF9B        | PLN       |
| GPR150        | SSTR1     |
| C8orf46       | TAGLN     |
| VEPH1         | GUCY1A2   |
| GLDC          | GRIK3     |
| DRD2          | FOXS1     |
| MMP7          | NAA11     |
| ITGB8         | BCL6B     |
| BZRAP1        | CYP4X1    |
| RP5-907D15.4  | KCNJ8     |
| CPSF1P1       | PODXL     |
| IGHV2-70      | ACTA2     |
| TCAM1P        | GPR4      |
| ZNF280A       | NXPH4     |
| TMTC2         | GJA4      |
| LINC01579     | LINC01436 |

**RIC49 (stability 0.813)**

**GO:BP neg : 80 terms(FDR<0.01)**

| Term                                    | FDR      |
|-----------------------------------------|----------|
| single-multicellular organism process   | 1.13e-03 |
| multicellular organismal process        | 1.35e-03 |
| developmental process                   | 1.47e-03 |
| cell-cell signaling                     | 1.47e-03 |
| regulation of membrane potential        | 2.35e-03 |
| regulation of peptide hormone secretion | 2.58e-03 |
| single-organism developmental process   | 2.58e-03 |
| peptide hormone secretion               | 3.01e-03 |
| multicellular organism development      | 3.01e-03 |
| anatomical structure development        | 3.31e-03 |
| system process                          | 6.97e-03 |
| nervous system development              | 7.52e-03 |
| system development                      | 7.52e-03 |
| regulation of peptide secretion         | 7.91e-03 |
| skeletal system development             | 7.91e-03 |
| insulin secretion                       | 7.91e-03 |
| single organism signaling               | 7.91e-03 |
| signaling                               | 7.91e-03 |
| regulation of insulin secretion         | 7.91e-03 |
| cell communication                      | 8.27e-03 |

**GO:CC neg : 28 terms(FDR<0.01)**

| Term                                   | FDR      |
|----------------------------------------|----------|
| plasma membrane part                   | 4.58e-05 |
| integral component of plasma membrane  | 4.58e-05 |
| intrinsic component of plasma membrane | 4.58e-05 |
| cell periphery                         | 4.58e-05 |
| plasma membrane                        | 1.17e-04 |
| synapse                                | 9.47e-04 |
| intrinsic component of membrane        | 1.86e-03 |
| synapse part                           | 1.86e-03 |
| neuron part                            | 6.17e-03 |
| myosin filament                        | 6.17e-03 |

**GO:MF neg : 22 terms(FDR<0.01)**

| Term                                        | FDR      |
|---------------------------------------------|----------|
| metal ion transmembrane transporter acti... | 4.72e-03 |
| cation channel activity                     | 4.72e-03 |
| voltage-gated cation channel activity       | 7.01e-03 |
| channel activity                            | 9.88e-03 |
| passive transmembrane transporter acti...   | 9.88e-03 |
| transmembrane signaling receptor activit... | 9.88e-03 |
| inorganic cation transmembrane transport... | 9.88e-03 |
| gated channel activity                      | 9.88e-03 |
| ion channel activity                        | 9.88e-03 |
| signaling receptor activity                 | 9.88e-03 |

**GO:BP pos : 982 terms(FDR<0.01)**

| Term                                        | FDR      |
|---------------------------------------------|----------|
| multicellular organismal process            | 1.50e-27 |
| single-multicellular organism process       | 8.27e-27 |
| circulatory system development              | 1.65e-25 |
| blood vessel development                    | 6.01e-24 |
| angiogenesis                                | 6.01e-24 |
| cardiovascular system development           | 6.01e-24 |
| vasculature development                     | 6.44e-24 |
| multicellular organism development          | 2.26e-23 |
| system development                          | 2.41e-22 |
| anatomical structure development            | 2.41e-22 |
| developmental process                       | 8.47e-22 |
| blood vessel morphogenesis                  | 9.65e-22 |
| single-organism developmental process       | 1.62e-21 |
| anatomical structure morphogenesis          | 3.01e-20 |
| system process                              | 1.20e-19 |
| single organism signaling                   | 6.01e-19 |
| cell communication                          | 6.19e-19 |
| signaling                                   | 8.35e-19 |
| anatomical structure formation involved ... | 2.37e-17 |
| circulatory system process                  | 1.43e-16 |

**GO:CC pos : 49 terms(FDR<0.01)**

| Term                                   | FDR      |
|----------------------------------------|----------|
| cell periphery                         | 1.04e-25 |
| plasma membrane                        | 6.78e-25 |
| extracellular space                    | 2.26e-23 |
| plasma membrane part                   | 1.01e-21 |
| intrinsic component of plasma membrane | 2.05e-21 |
| extracellular matrix                   | 1.96e-20 |
| integral component of plasma membrane  | 7.86e-20 |
| intrinsic component of membrane        | 5.04e-17 |
| extracellular region                   | 1.85e-16 |
| proteinaceous extracellular matrix     | 2.38e-16 |

**GO:MF pos : 89 terms(FDR<0.01)**

| Term                                        | FDR      |
|---------------------------------------------|----------|
| transmembrane receptor activity             | 7.16e-16 |
| receptor activity                           | 7.16e-16 |
| molecular transducer activity               | 7.16e-16 |
| signaling receptor activity                 | 1.93e-15 |
| transmembrane signaling receptor activit... | 2.92e-15 |
| growth factor binding                       | 1.00e-11 |
| G-protein coupled receptor activity         | 1.10e-11 |
| receptor binding                            | 1.34e-10 |
| glycosaminoglycan binding                   | 1.43e-10 |
| signal transducer activity                  | 3.05e-09 |

**Cox regression:**  
logtest pv=2.4e-01  
LHR=0.62 (CI = -0.41, 1.66)

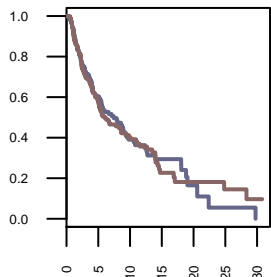

**SampleType**  
pv=1.6e-03

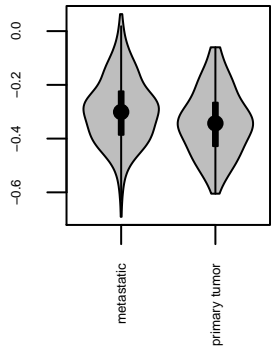

**factor**  
SampleType  
Cluster  
Dataset  
Gender

**Cluster**  
pv=2.0e-02

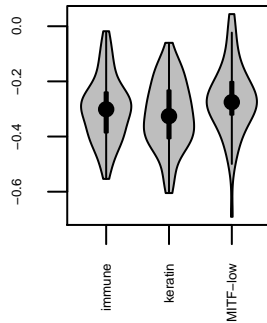

**Dataset**  
pv=6.3e-02

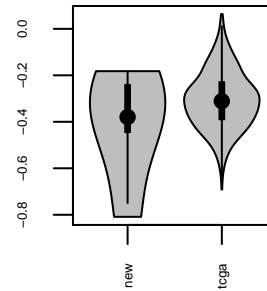

**p.value**  
1.60e-03  
2.04e-02  
6.26e-02  
4.30e-01

**Gender**  
pv=4.3e-01

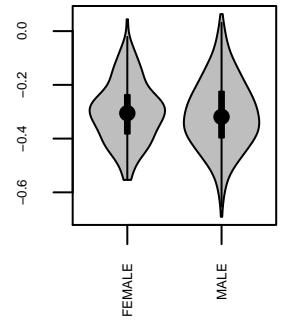



**Metagene**

(involvement of features)

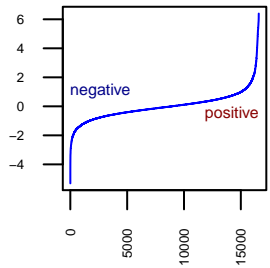

**RIC55 (stability 0.963)**

**GO:BP neg : 0 terms(FDR<0.01)**

**GO:BP pos : 388 terms(FDR<0.01)**

| Term                                | FDR      |
|-------------------------------------|----------|
| cell cycle                          | 6.54e-29 |
| cell cycle process                  | 6.54e-29 |
| mitotic cell cycle                  | 6.54e-29 |
| mitotic cell cycle process          | 6.54e-29 |
| nuclear division                    | 6.54e-29 |
| organelle fission                   | 6.54e-29 |
| chromosome segregation              | 6.54e-29 |
| mitotic nuclear division            | 6.54e-29 |
| nuclear chromosome segregation      | 6.54e-29 |
| cell division                       | 6.54e-29 |
| chromosome organization             | 6.54e-29 |
| sister chromatid segregation        | 6.54e-29 |
| DNA metabolic process               | 6.54e-29 |
| DNA replication                     | 6.54e-29 |
| cell cycle phase transition         | 6.54e-29 |
| mitotic cell cycle phase transition | 6.54e-29 |
| regulation of cell cycle            | 6.54e-29 |
| organelle organization              | 6.54e-29 |
| sister chromatid cohesion           | 6.54e-29 |
| DNA-dependent DNA replication       | 6.54e-29 |

**GO:CC neg : 1 terms(FDR<0.01)**

| Term                | FDR      |
|---------------------|----------|
| HCN channel complex | 7.88e-02 |

**GO:CC pos : 120 terms(FDR<0.01)**

| Term                                        | FDR      |
|---------------------------------------------|----------|
| chromosome                                  | 1.53e-29 |
| chromosomal part                            | 1.53e-29 |
| chromosomal region                          | 1.53e-29 |
| condensed chromosome                        | 1.53e-29 |
| chromosome, centromeric region              | 1.53e-29 |
| condensed chromosome, centromeric region    | 1.53e-29 |
| kinetochore                                 | 1.53e-29 |
| non-membrane-bounded organelle              | 1.53e-29 |
| intracellular non-membrane-bounded organ... | 1.53e-29 |
| condensed chromosome kinetochore            | 1.53e-29 |

**GO:MF neg : 3 terms(FDR<0.01)**

| Term                                        | FDR      |
|---------------------------------------------|----------|
| intracellular cAMP activated cation chan... | 6.87e-02 |
| ligand-gated ion channel activity           | 6.87e-02 |
| ligand-gated channel activity               | 6.87e-02 |

**GO:MF pos : 67 terms(FDR<0.01)**

| Term                                        | FDR      |
|---------------------------------------------|----------|
| single-stranded DNA-dependent ATPase act... | 2.32e-11 |
| DNA-dependent ATPase activity               | 1.46e-10 |
| DNA helicase activity                       | 3.72e-10 |
| ATP binding                                 | 2.04e-09 |
| adenyl ribonucleotide binding               | 5.15e-09 |
| adenyl nucleotide binding                   | 6.44e-09 |
| ATPase activity                             | 1.10e-08 |
| chromatin binding                           | 2.84e-08 |
| microtubule motor activity                  | 3.58e-08 |
| DNA binding                                 | 7.73e-08 |

- |                     |                     |
|---------------------|---------------------|
| <b>113 negative</b> | <b>383 positive</b> |
| LINC01021           | DEPDC1              |
| TCERG1L             | POLQ                |
| GLB1L2              | ASPM                |
| CST1                | RAD54L              |
| CLUL1               | BIRC5               |
| LINC00648           | MYBL2               |
| SEZ6L2              | FAM83D              |
| FAM155B             | NCAPG               |
| PCDHGA7             | FOXM1               |
| FBXO2               | TTK                 |
| LINC00086           | KIF20A              |
| PODNL1              | CDC20               |
| ABCC11              | NEK2                |
| SHC2                | NCAPH               |
| CD177               | DLGAP5              |
| EDA2R               | FAM64A              |
| PTCHD4              | SGOL1               |
| ZFP57               | TOP2A               |
| PNMA3               | TROAP               |
| EDN3                | ESPL1               |
| RP11-3L21.2         | NUF2                |
| DNAH5               | MKI67               |
| PTGDS               | SKA1                |
| APOD                | CCNB2               |
| HOXC12              | KIF15               |
| LRAT                | SKA3                |
| SERPINI1            | KIAA0101            |
| ADARB2              | PLK1                |
| RP5-1007F24.1       | PBK                 |
| SPATA18             | CKAP2L              |
| CEL5                | ESCO2               |
| CCDC184             | RRM2                |
| SOD3                | EXO1                |
| RORC                | AURKB               |
| TRIML2              | KIF18B              |
| RP11-295M3.4        | ERCC6L              |
| COL8A1              | ANLN                |
| CRTAC1              | MCM10               |
| SCG3                | CLSPN               |
| TRAM1L1             | CDC45               |
| CHGB                | CENPF               |
| KCNJ13              | KIF14               |
| CDH19               | HJURP               |
| PCSK2               | BUB1B               |
| SALL1               | UBE2C               |
| ANGPTL7             | GSG2                |
| HCN2                | GTSE1               |
| NANOS1              | CASC5               |
| GRIA2               | TICRR               |
| NPTXR               | CDC45               |
| CNTN4               | TERT                |
| LDHD                | FAM111B             |
| LYNX1               | SPC25               |
| RP11-760H22.2       | MELK                |
| AC005330.2          | KIFC1               |
| PRUNE2              | KIF4A               |
| RGS11               | CDC25C              |
| PLAG1               | NUSAP1              |
| EEF1A2              | ASF1B               |
| DPP6                | CENPE               |
| MTRNR2L1            | KIF2C               |
| SYNPR               | DTL                 |
| C16orf45            | DIAPH3              |
| FAM135B             | CDC47               |
| SERPINA3            | ARHGAP11A           |
| TPD52L1             | E2F7                |
| SNED1               | E2F8                |
| HCN1                | CENPA               |
| ATP1B2              | PRC1                |
| SGSM1               | UHRF1               |
| CDK5R2              | KIF18A              |
| SEPP1               | IQGAP3              |
| SERPINA3            | CDC48               |
| NME5                | PKMYT1              |
| GABRB1              | TPX2                |
| TMEM151A            | CDC42               |
| KLFB                | ORC1                |
| GDF15               | HMMR                |
| GALNT14             | TK1                 |
| RP6-24A23.7         | BUB1                |
| RP6-24A23.3         | CEP55               |
| HPN-AS1             | CDK1                |

**Cox regression:**  
logtest pv=3.0e-02  
LHR=1.09 (CI = 0.10, 2.07)

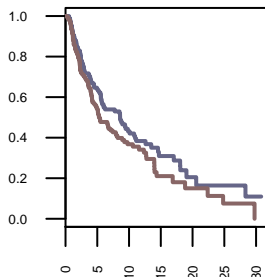

**SampleType**  
pv=7.4e-02

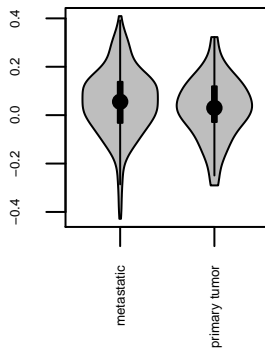

**factor**  
SampleType  
Gender  
Dataset  
Cluster

**p.value**  
7.41e-02  
1.17e-01  
3.12e-01  
3.13e-01

**Gender**  
pv=1.2e-01

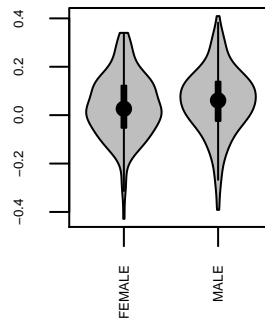

**Dataset**  
pv=3.1e-01

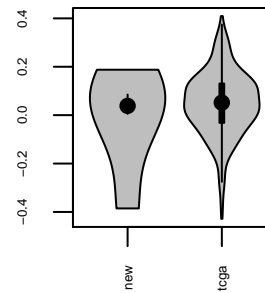

**Cluster**  
pv=3.1e-01

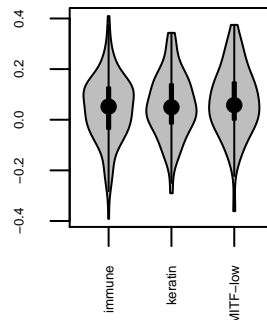

Metagene

(involvement of features)

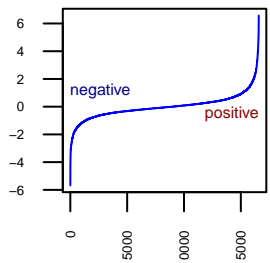

**356 negative**      **607 positive**

- FRG2DP
- LGALS17A
- CXCL11
- ART3
- CXCL13
- IDO1
- GBP1P1
- IFNG
- BEX1
- XIRP1
- OR21P
- RAB39B
- LINC01474
- RDH8
- CTLA4
- ZBED2
- GBP4
- COL22A1
- EXOC3L4
- CXCL9
- FBXO2
- TOX
- RP11-84D1.2
- PRSS12
- AC145110.1
- SNCB
- GBP1
- MAGEB2
- ICOS
- CXCL10
- EOMES
- CEACAM1
- BAAT
- MKRN3
- PPP1R3C
- UBD
- GLB1L3
- MS4A15
- EF5
- PKLR
- STEAP2
- ETV7
- CD5L
- KIAA1244
- MIAT
- OR2A1-AS1
- TSPEAR
- KIAA1045
- PYGO1
- TMEM215
- CTC-453G23.5
- ZFP57
- TSPEAR-AS1
- PDCD1
- BNC1
- CKMT2
- TSPEAR-AS2
- BBOX1
- GZMB
- BARX2
- C1orf106
- PSPHP1
- BCAN
- MYH14
- ACY3
- HCG4P5
- GZMH
- LPAR3
- FAM19A5
- HCP5
- ZNF503-AS1
- RP11-3L21.2
- KIF12
- MYT1
- MMP3
- CDKN2A
- DTHD1
- RP1-40E16.9
- LINC01314
- FASLG
- RP11-1094M14.8
- HKDC1
- STAB1
- SLC11A1
- MARCO
- MSR1
- CD84
- CD209
- TREM2
- AQP9
- CD33
- LILRB5
- HAMP
- MS4A4A
- LY86
- IGSF21
- SPP1
- KCNJ5
- ADORA3
- HS3ST2
- F13A1
- TREM1
- ALOX5AP
- LYVE1
- CD180
- SLCO2B1
- SLC2A5
- VSIG4
- CCR1
- DCSTAMP
- CYBB
- FOLR2
- LAIR1
- CD300A
- SIGLEC7
- ITGAM
- CD14
- GPR34
- OLR1
- CD163
- CSF1R
- LILRB4
- FPR3
- TLR7
- C5AR1
- MPEG1
- CR1
- FCGR3A
- SEPP1
- CLEC5A
- MRC1
- FCGBP
- SIRPB2
- LILRA2
- CD86
- C1QC
- FBP1
- LRRC25
- NPTX1
- C3AR1
- EYA4
- C1QB
- LILRA5
- CD300C
- OSCAR
- MS4A6A
- PILRA
- SIGLEC1
- LAPTM5
- CD163L1
- ATP6V0D2
- PRIMA1
- FPR1
- FCER1A
- TYROBP
- RNASE6
- SIGLEC14
- ALOX5
- ITGB2
- CMKLR1
- LILRA6
- LILRB1

RIC57 (stability 0.805)

GO:BP neg : 133 terms(FDR<0.01)

| Term                                        | FDR      |
|---------------------------------------------|----------|
| defense response                            | 8.42e-10 |
| immune system process                       | 3.16e-07 |
| immune response                             | 8.52e-07 |
| T cell activation                           | 1.13e-06 |
| type I interferon signaling pathway         | 9.52e-06 |
| cellular response to type I interferon      | 9.52e-06 |
| innate immune response                      | 9.88e-06 |
| response to type I interferon               | 1.43e-05 |
| lymphocyte activation                       | 1.84e-05 |
| cytokine-mediated signaling pathway         | 1.91e-05 |
| regulation of immune system process         | 1.91e-05 |
| regulation of T cell activation             | 4.01e-05 |
| defense response to virus                   | 4.01e-05 |
| response to other organism                  | 4.01e-05 |
| response to external biotic stimulus        | 4.01e-05 |
| response to biotic stimulus                 | 4.32e-05 |
| response to interferon-gamma                | 4.51e-05 |
| regulation of leukocyte cell-cell adhesi... | 7.18e-05 |
| response to cytokine                        | 7.91e-05 |
| cellular response to cytokine stimulus      | 9.77e-05 |

GO:CC neg : 4 terms(FDR<0.01)

| Term                             | FDR      |
|----------------------------------|----------|
| side of membrane                 | 6.97e-03 |
| plasma membrane part             | 7.33e-03 |
| external side of plasma membrane | 1.15e-02 |
| T cell receptor complex          | 1.15e-02 |

GO:MF neg : 7 terms(FDR<0.01)

| Term                             | FDR      |
|----------------------------------|----------|
| cytokine activity                | 1.59e-04 |
| CXCR3 chemokine receptor binding | 2.79e-04 |
| chemokine activity               | 2.72e-03 |
| chemokine receptor binding       | 1.37e-02 |
| cytokine receptor binding        | 1.37e-02 |
| CXCR chemokine receptor binding  | 5.73e-02 |
| MHC protein binding              | 8.59e-02 |

GO:BP pos : 790 terms(FDR<0.01)

| Term                                        | FDR      |
|---------------------------------------------|----------|
| immune response                             | 2.15e-28 |
| immune system process                       | 2.15e-28 |
| defense response                            | 2.15e-28 |
| leukocyte activation                        | 2.15e-28 |
| immune effector process                     | 2.15e-28 |
| cell activation                             | 2.15e-28 |
| leukocyte mediated immunity                 | 2.15e-28 |
| regulation of immune system process         | 3.76e-27 |
| inflammatory response                       | 7.35e-27 |
| regulation of immune response               | 2.41e-26 |
| leukocyte activation involved in immune ... | 6.15e-26 |
| cell activation involved in immune respo... | 7.27e-26 |
| myeloid leukocyte activation                | 1.50e-24 |
| response to stimulus                        | 4.19e-22 |
| regulated exocytosis                        | 6.32e-22 |
| secretion                                   | 1.32e-21 |
| secretion by cell                           | 4.42e-21 |
| positive regulation of immune system pro... | 5.51e-21 |
| leukocyte degranulation                     | 1.66e-20 |
| innate immune response                      | 2.78e-20 |

GO:CC pos : 70 terms(FDR<0.01)

| Term                                   | FDR      |
|----------------------------------------|----------|
| plasma membrane                        | 2.29e-29 |
| cell periphery                         | 2.29e-29 |
| membrane part                          | 2.29e-29 |
| plasma membrane part                   | 2.29e-29 |
| intrinsic component of membrane        | 2.29e-29 |
| integral component of membrane         | 2.29e-29 |
| integral component of plasma membrane  | 2.29e-29 |
| intrinsic component of plasma membrane | 2.29e-29 |
| secretory granule                      | 3.05e-20 |
| secretory vesicle                      | 7.33e-20 |

GO:MF pos : 71 terms(FDR<0.01)

| Term                                        | FDR      |
|---------------------------------------------|----------|
| receptor activity                           | 2.15e-28 |
| molecular transducer activity               | 2.15e-28 |
| signaling receptor activity                 | 9.88e-22 |
| transmembrane receptor activity             | 1.29e-20 |
| transmembrane signaling receptor activit... | 2.58e-20 |
| signal transducer activity                  | 3.51e-18 |
| carbohydrate binding                        | 9.81e-08 |
| cargo receptor activity                     | 1.40e-06 |
| G-protein coupled receptor activity         | 2.10e-06 |
| signaling pattern recognition receptor a... | 5.73e-06 |

Cox regression:  
logtest pv=5.3e-01  
LHR=0.45 (CI = -0.96, 1.86)

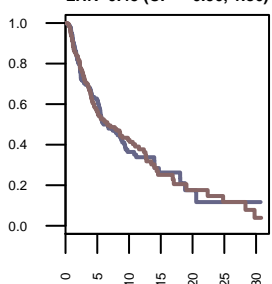

Dataset  
pv=9.8e-08

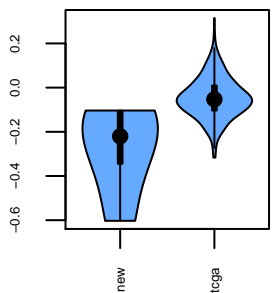

factor  
Dataset  
SampleType  
Cluster  
Gender

p.value  
9.83e-08  
1.11e-05  
3.20e-04  
6.28e-01

SampleType  
pv=1.1e-05

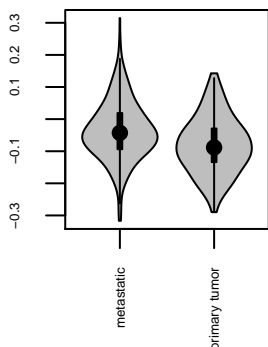

Cluster  
pv=3.2e-04

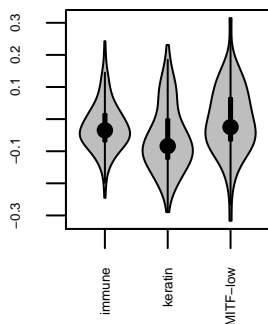

Gender  
pv=6.3e-01

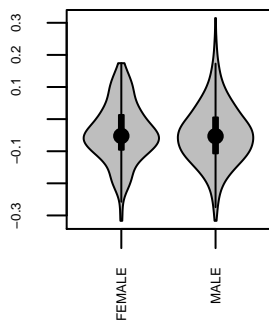

**Metagene**

(involvement of features)

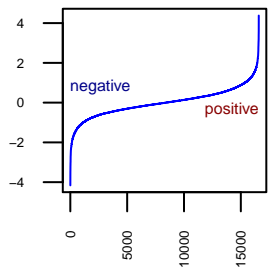

**RIC74 (stability 0.532)**

GO:BP neg : 0 terms(FDR<0.01)

GO:BP pos : 0 terms(FDR<0.01)

GO:CC neg : 0 terms(FDR<0.01)

GO:CC pos : 0 terms(FDR<0.01)

GO:MF neg : 0 terms(FDR<0.01)

GO:MF pos : 0 terms(FDR<0.01)

**100  
negative**

**108  
positive**

- |               |               |
|---------------|---------------|
| BFSP2         | CCNYL2        |
| PIP5K1B       | DAPL1         |
| ROBO2         | SOSTDC1       |
| B3GAT1        | APCDD1L       |
| PLA1A         | GFRA3         |
| IGKV2-29      | RASGEF1C      |
| MAGEC1        | LRRTM4        |
| RIMS4         | ST8SIA6-AS1   |
| PRRT4         | FZD9          |
| LRRC4B        | LINC00839     |
| SYT6          | BVES          |
| UGT8          | CHRD1         |
| KLHL14        | NCAM1         |
| IGLL3P        | C1QL4         |
| OLFM3         | OTX1          |
| TFF2          | NPY1R         |
| DNASE2B       | IL22RA1       |
| TMEM255A      | GPR143        |
| CDH15         | GAL           |
| RP11-307C19.2 | IGFN1         |
| TTLL6         | ID12-AS1      |
| TTC39A        | CCL21         |
| ATP12A        | DCAF12L1      |
| SLC17A9       | EFHD1         |
| TRGV5         | RP11-809C18.3 |
| CD79B         | APCDD1L-AS1   |
| CAMK2B        | COL20A1       |
| DERL3         | IGLV3-1       |
| VSTM2L        | GRIA1         |
| ANO5          | AC110781.3    |
| LINC01474     | CASC15        |
| AMPH          | RP11-865I6.2  |
| KLHL6         | FERMT1        |
| MME           | CDH12         |
| IGKV1D-33     | DSCR8         |
| IGKV1D-12     | ST8SIA6       |
| IGKV2D-30     | TET1          |
| IGKV2D-28     | ISM1          |
| LINC00494     | NKX2-5        |
| MYO5B         | LINC01436     |
| JPH4          | AHNAK2        |
| RP11-81H14.2  | PTPLA         |
| EAF2          | POPDC3        |
| FAM78A        | ABCC11        |
| CLEC11A       | PALM3         |
| TPSB2         | KC6           |
| KLK1          | BOLA3-AS1     |
| SPP1          | MAT1A         |
| PKLR          | TFAP2B        |
| CNR1          | ERVMER61-1    |
| PTGDS         | AHRR          |
| NUDT10        | SOX2          |
| CD22          | REN           |
| SH2D1B        | KCNIP3        |
| IGKV1D-43     | RP5-984P4.6   |
| MTND4P12      | HNFG4         |
| DCX           | ABCA8         |
| IL24          | CDHR3         |
| SYT3          | TDRP          |
| EYA1          | C10orf82      |
| IGKV1D-39     | RAC3          |
| CTA-292E10.9  | DLX2          |
| TF            | RP11-132A1.4  |
| HSPA7         | RGR           |
| GRAP          | CCL19         |
| ATP1A4        | MTRNR2L1      |
| COCH          | SOX9-AS1      |
| CXCL1         | HS6ST3        |
| KCNK10        | HOXC8         |
| IGKV1-39      | ZNF239        |
| TMEM71        | RP11-838N2.5  |
| SHANK1        | LOXL4         |
| RP11-404F10.2 | FBN3          |
| KIF17         | ADH1B         |
| RP4-765C7.2   | OGDHL         |
| KBTBD8        | MEX3A         |
| CLEC12B       | TRPM1         |
| IGKV2OR22-4   | BAIAP2L1      |
| HAO2          | ROR1-AS1      |
| IGLV9-49      | SLC45A2       |
| RP5-1086K13.1 | PHYHIP        |
| PRSS30P       | LINC01249     |

Cox regression:  
logtest pv=1.2e-05  
LHR=3.27 (CI = 1.75, 4.79)

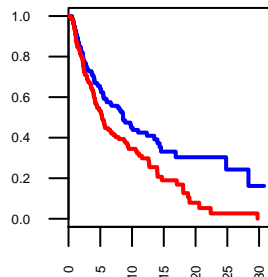

Cluster  
pv=5.0e-17

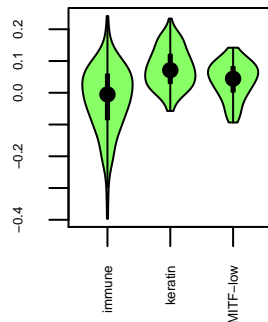

factor  
Cluster  
SampleType  
Gender  
Dataset

p.value  
4.99e-17  
2.08e-05  
1.18e-02  
4.59e-02

SampleType  
pv=2.1e-05

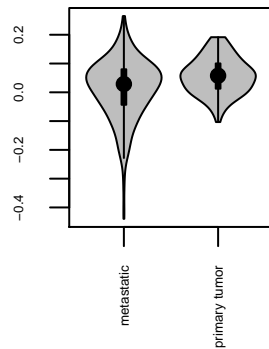

Gender  
pv=1.2e-02

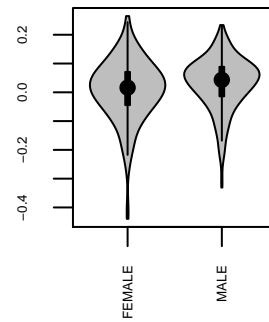

Dataset  
pv=4.6e-02

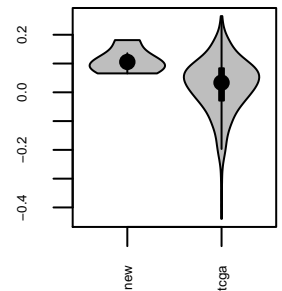

**Metagene  
(involvement of features)**

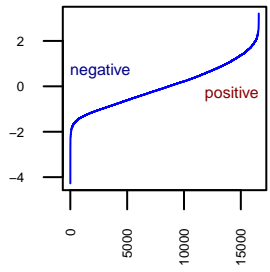

0 negative      0 positive

**RIC75 (stability 0.914)**

GO:BP neg : 0 terms(FDR<0.01)

GO:BP pos : 0 terms(FDR<0.01)

GO:CC neg : 0 terms(FDR<0.01)

GO:CC pos : 0 terms(FDR<0.01)

GO:MF neg : 0 terms(FDR<0.01)

GO:MF pos : 0 terms(FDR<0.01)

Cox regression:  
logtest pv=1.3e-03  
LHR=-0.93 (CI = -1.46, -0.40)

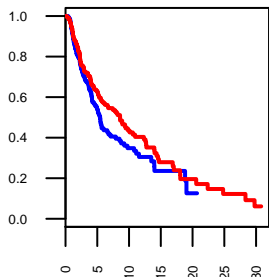

factor  
Cluster  
Dataset  
SampleType  
Gender

p.value  
1.69e-08  
1.07e-07  
2.19e-05  
1.11e-01

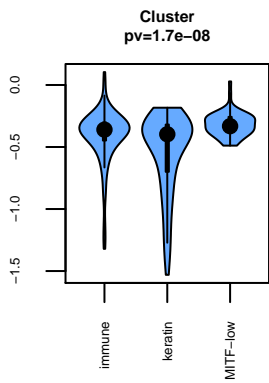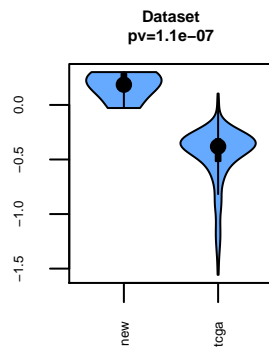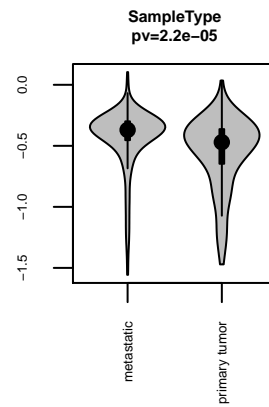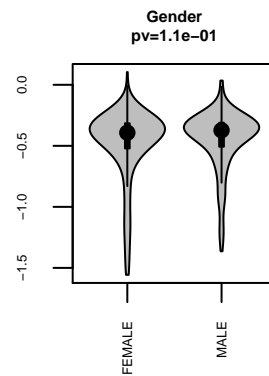

**Metagene**

(involvement of features)

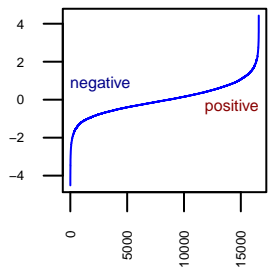

**RIC79 (stability 0.704)**

GO:BP neg : 0 terms(FDR<0.01)

GO:BP pos : 0 terms(FDR<0.01)

GO:CC neg : 0 terms(FDR<0.01)

GO:CC pos : 0 terms(FDR<0.01)

GO:MF neg : 0 terms(FDR<0.01)

GO:MF pos : 0 terms(FDR<0.01)

**22  
negative**

**26  
positive**

- |                |               |
|----------------|---------------|
| TYRP1          | PRSS50        |
| RP11-284F21.7  | WFDC1         |
| CLUL1          | DAPL1         |
| CTAG2          | FXYP7         |
| RP11-706O15.3  | PPP1R14C      |
| COL9A1         | PSPHP1        |
| SLC30A2        | RP11-369C8.1  |
| RP11-284F21.10 | RP11-575F12.3 |
| PHKA1          | COCH          |
| RP11-284F21.9  | ABCA6         |
| SLC6A17        | KCNS3         |
| ONECUT2        | LRRTM1        |
| MT1A           | RGS9          |
| GAPDHS         | SHANK2        |
| KLF14          | TNNT1         |
| MNX1           | AKR1C1        |
| SULT4A1        | MAMDC2        |
| MMACHC         | SMPDL3B       |
| GSG1L          | PPAP2C        |
| IGSF9B         | DCC           |
| PAEP           | ARHGGEF16     |
| HIST1H3H       | SIK1          |
|                | SIX3          |
|                | PLEKHH2       |
|                | SLC38A11      |
|                | RNF43         |

Cox regression:  
logtest pv=5.2e-03  
LHR=-1.60 (CI = -2.73, -0.47)

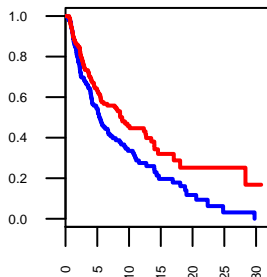

factor  
Cluster  
SampleType  
Dataset  
Gender

p.value  
1.27e-11  
1.44e-02  
6.26e-01  
7.80e-01

Cluster  
pv=1.3e-11

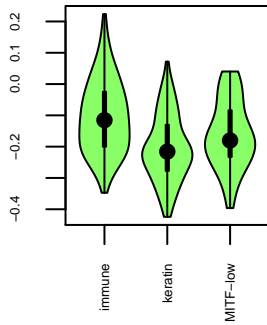

SampleType  
pv=1.4e-02

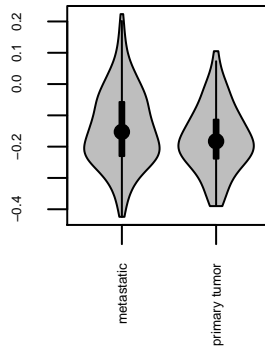

Dataset  
pv=6.3e-01

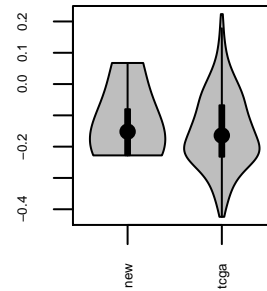

Gender  
pv=7.8e-01

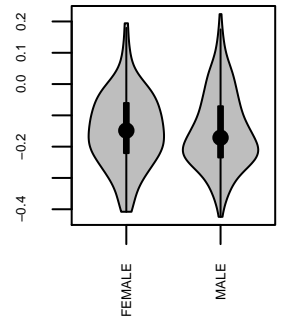

# MIC1 (stability 0.934)

## Metagene

(involvement of features)

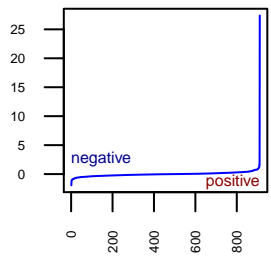

**8**  
negative

**10**  
positive

- |                   |                 |
|-------------------|-----------------|
| hsa-miR-205-5p    | hsa-miR-146a-3p |
| hsa-miR-199b-5p   | hsa-miR-338-5p  |
| hsa-miR-876-5p    | hsa-miR-551b-3p |
| hsa-miR-1266-5p   | hsa-miR-598-3p  |
| hsa-miR-301b-3p   | hsa-miR-206     |
| hsa-miR-3690      | hsa-miR-34a-5p  |
| hsa-miR-365a-3p   | hsa-miR-338-3p  |
| hsa-miR-125b-1-3p | hsa-miR-146a-5p |
|                   | hsa-miR-1269a   |
|                   | hsa-miR-573     |

Cox regression:  
logtest pv=9.4e-04  
LHR=1.79 (CI = 0.75, 2.82)

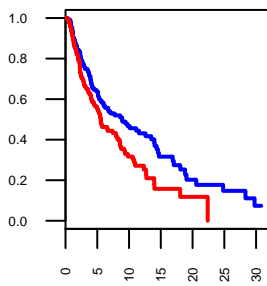

Cluster  
pv=1.0e-01

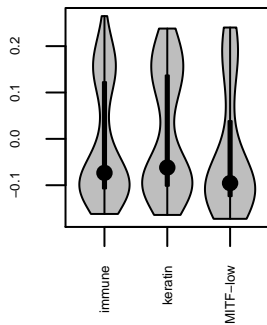

factor  
Cluster  
SampleType  
Dataset  
Gender

p.value  
1.03e-01  
7.73e-01  
7.83e-01  
8.70e-01

SampleType  
pv=7.7e-01

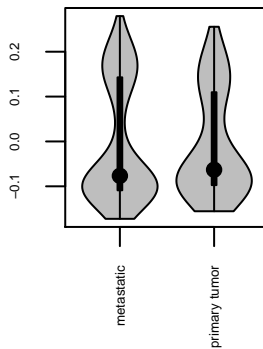

Dataset  
pv=7.8e-01

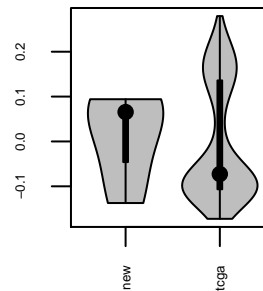

Gender  
pv=8.7e-01

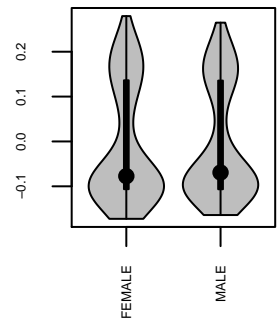

**Metagene**  
(involvement of features)

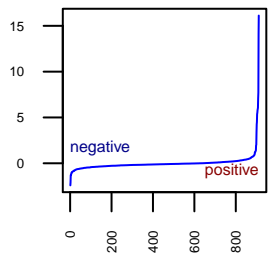

**MIC9 (stability 0.988)**

**18**  
negative

- hsa-miR-675-3p
- hsa-miR-217
- hsa-miR-137
- hsa-miR-483-5p
- hsa-miR-216a-5p
- hsa-miR-1228-5p
- hsa-miR-483-3p
- hsa-miR-1-3p
- hsa-miR-504-5p
- hsa-miR-592
- hsa-miR-215-5p
- hsa-miR-2116-3p
- hsa-miR-873-5p
- hsa-miR-378c
- hsa-miR-133a-3p
- hsa-miR-1224-5p
- hsa-miR-218-1-3p
- hsa-miR-876-5p

**37**  
positive

- hsa-miR-141-3p
- hsa-miR-141-5p
- hsa-miR-200a-3p
- hsa-miR-200a-5p
- hsa-miR-200b-3p
- hsa-miR-200b-5p
- hsa-miR-200c-3p
- hsa-miR-200c-5p
- hsa-miR-203a-3p
- hsa-miR-205-3p
- hsa-miR-205-5p
- hsa-miR-224-5p
- hsa-miR-429
- hsa-miR-944
- hsa-miR-31-3p
- hsa-miR-31-5p
- hsa-miR-452-5p
- hsa-miR-375
- hsa-miR-3161
- hsa-miR-1295a
- hsa-miR-1293
- hsa-miR-206
- hsa-miR-183-5p
- hsa-miR-27b-5p
- hsa-miR-224-3p
- hsa-miR-26a-2-3p
- hsa-miR-383-5p
- hsa-miR-223-3p
- hsa-miR-452-3p
- hsa-miR-577
- hsa-miR-1249-3p
- hsa-miR-27b-3p
- hsa-miR-149-5p
- hsa-miR-202-5p
- hsa-miR-188-5p
- hsa-miR-139-5p
- hsa-miR-885-5p

**Cox regression:**  
logtest pv=2.9e-02  
LHR=0.77 (CI = 0.12, 1.43)

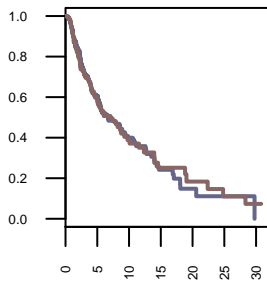

**factor**  
SampleType  
Cluster  
Dataset  
Gender

**p.value**  
1.77e-49  
1.70e-18  
1.13e-03  
3.27e-02

**SampleType**  
pv=1.8e-49

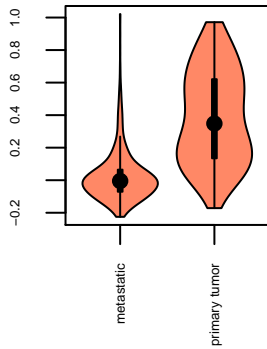

**Cluster**  
pv=1.7e-18

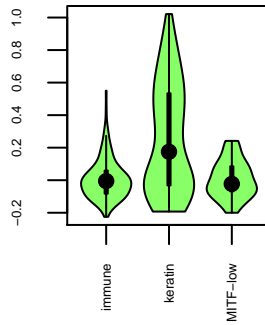

**Dataset**  
pv=1.1e-03

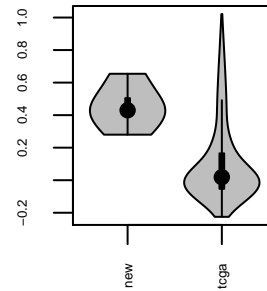

**Gender**  
pv=3.3e-02

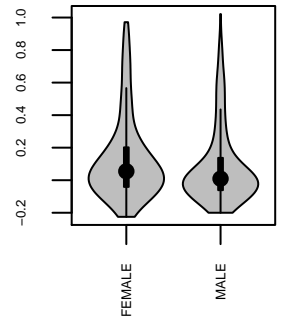

# MIC11 (stability 0.994)

## Metagene

(involvement of features)

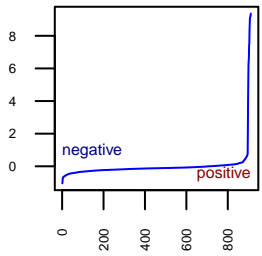

**12**  
negative

**33**  
positive

- hsa-miR-3200-3p
- hsa-miR-137
- hsa-miR-2355-3p
- hsa-miR-296-5p
- hsa-miR-452-3p
- hsa-miR-548b-3p
- hsa-miR-3170
- hsa-miR-1287-5p
- hsa-miR-149-5p
- hsa-miR-153-3p
- hsa-miR-548v
- hsa-miR-3922-3p
- hsa-miR-506-3p
- hsa-miR-507
- hsa-miR-508-3p
- hsa-miR-508-5p
- hsa-miR-509-3-5p
- hsa-miR-509-3p
- hsa-miR-509-5p
- hsa-miR-510-5p
- hsa-miR-513a-3p
- hsa-miR-513a-5p
- hsa-miR-513b-5p
- hsa-miR-513c-5p
- hsa-miR-514a-3p
- hsa-miR-514b-3p
- hsa-miR-514b-5p
- hsa-miR-3161
- hsa-miR-211-5p
- hsa-miR-204-5p
- hsa-miR-183-5p
- hsa-miR-219a-2-3p
- hsa-miR-3065-5p
- hsa-miR-1291
- hsa-miR-3065-3p
- hsa-miR-1243
- hsa-miR-138-1-3p
- hsa-miR-891a-5p
- hsa-miR-193b-3p
- hsa-miR-182-5p
- hsa-miR-205-5p
- hsa-miR-658
- hsa-miR-138-5p
- hsa-miR-31-5p
- hsa-miR-184

**Cox regression:**  
logtest pv=9.9e-02  
LHR=0.30 (CI = -0.06, 0.67)

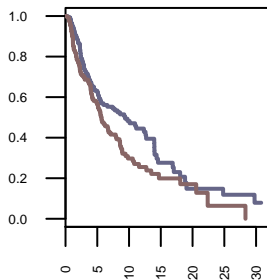

**Cluster**  
pv=6.0e-15

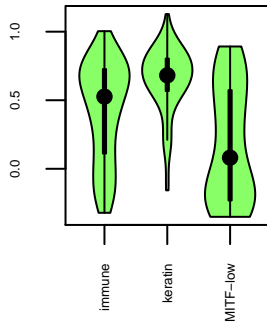

**factor**  
Cluster  
SampleType  
Gender  
Dataset

**p.value**  
5.96e-15  
8.86e-06  
4.84e-01  
8.42e-01

**SampleType**  
pv=8.9e-06

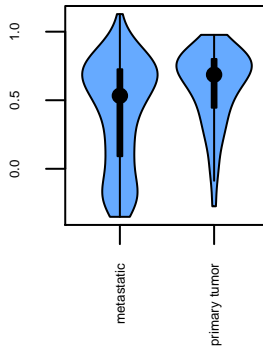

**Gender**  
pv=4.8e-01

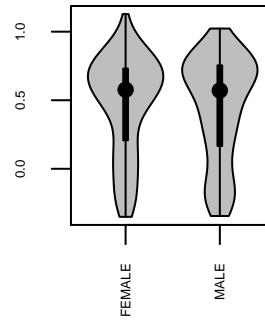

**Dataset**  
pv=8.4e-01

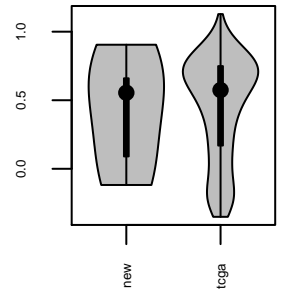



# MIC14 (stability 0.891)

## Metagene

(involvement of features)

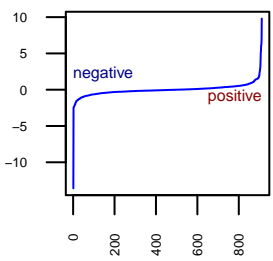

**33**  
negative

- hsa-miR-211-5p
- hsa-miR-1266-5p
- hsa-miR-130a-3p
- hsa-miR-1247-5p
- hsa-miR-3150b-3p
- hsa-miR-615-3p
- hsa-miR-873-5p
- hsa-miR-146a-5p
- hsa-miR-1287-5p
- hsa-miR-483-3p
- hsa-miR-483-5p
- hsa-miR-378c
- hsa-let-7d-5p
- hsa-miR-548k
- hsa-miR-3170
- hsa-miR-1301-3p
- hsa-miR-1910-5p
- hsa-miR-34a-5p
- hsa-miR-195-3p
- hsa-miR-29b-1-5p
- hsa-miR-130a-5p
- hsa-miR-196a-5p
- hsa-miR-1249-3p
- hsa-miR-30b-3p
- hsa-miR-193b-5p
- hsa-miR-29b-3p
- hsa-miR-193b-3p
- hsa-miR-582-3p
- hsa-let-7d-3p
- hsa-miR-181a-2-3p
- hsa-miR-582-5p
- hsa-miR-10a-3p
- hsa-miR-378a-5p

**39**  
positive

- hsa-miR-100-5p
- hsa-miR-137
- hsa-miR-3161
- hsa-miR-551b-3p
- hsa-miR-577
- hsa-miR-885-5p
- hsa-miR-9-3p
- hsa-miR-9-5p
- hsa-miR-598-3p
- hsa-miR-125b-1-3p
- hsa-miR-125b-5p
- hsa-miR-135b-5p
- hsa-miR-3200-3p
- hsa-miR-592
- hsa-miR-100-3p
- hsa-miR-149-5p
- hsa-miR-140-3p
- hsa-miR-542-3p
- hsa-miR-424-3p
- hsa-miR-3681-5p
- hsa-miR-424-5p
- hsa-miR-542-5p
- hsa-miR-221-5p
- hsa-miR-140-5p
- hsa-miR-450a-5p
- hsa-miR-375
- hsa-miR-1468-5p
- hsa-miR-944
- hsa-miR-222-5p
- hsa-miR-551b-5p
- hsa-miR-21-5p
- hsa-miR-221-3p
- hsa-miR-2355-5p
- hsa-miR-1305
- hsa-miR-892a
- hsa-miR-935
- hsa-miR-193a-3p
- hsa-miR-21-3p
- hsa-miR-92b-3p

Cox regression:  
logtest pv=1.5e-02  
LHR=-1.14 (CI = -2.08, -0.21)

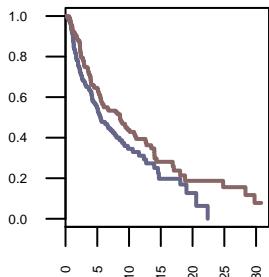

Cluster  
pv=2.8e-20

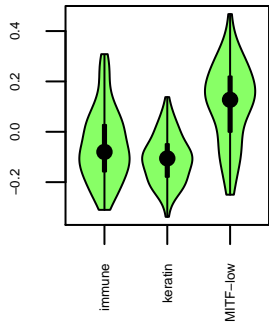

factor  
Cluster  
SampleType  
Dataset  
Gender

p.value  
2.80e-20  
1.13e-03  
1.42e-01  
7.55e-01

SampleType  
pv=1.1e-03

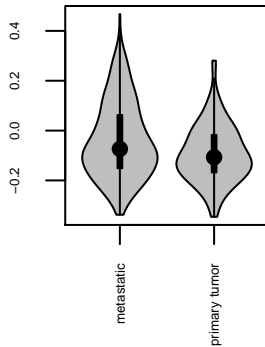

Dataset  
pv=1.4e-01

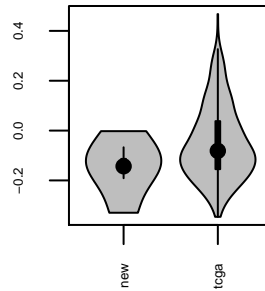

Gender  
pv=7.5e-01

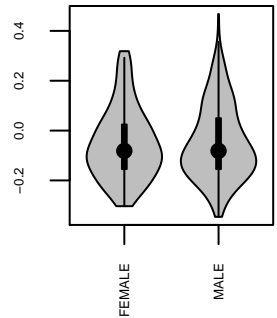

# MIC20 (stability 0.962)

## Metagene

(involvement of features)

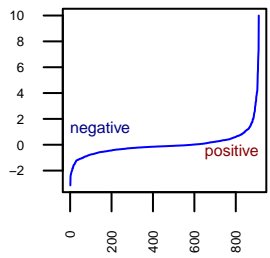

**23**  
negative

**56**  
positive

- hsa-miR-149-5p
- hsa-miR-27b-5p
- hsa-miR-205-5p
- hsa-miR-27b-3p
- hsa-miR-196b-5p
- hsa-miR-1296-5p
- hsa-miR-1262
- hsa-miR-3170
- hsa-miR-24-1-5p
- hsa-miR-1305
- hsa-miR-199b-5p
- hsa-miR-151a-3p
- hsa-miR-23b-3p
- hsa-miR-582-5p
- hsa-miR-196a-5p
- hsa-miR-190a-5p
- hsa-miR-887-3p
- hsa-miR-30d-3p
- hsa-miR-885-5p
- hsa-miR-1-3p
- hsa-miR-550a-5p
- hsa-miR-20a-3p
- hsa-miR-33a-5p

- hsa-miR-1247-5p
- hsa-miR-142-3p
- hsa-miR-142-5p
- hsa-miR-146b-3p
- hsa-miR-150-5p
- hsa-miR-155-3p
- hsa-miR-155-5p
- hsa-miR-1976
- hsa-miR-223-3p
- hsa-miR-223-5p
- hsa-miR-29c-3p
- hsa-miR-342-3p
- hsa-miR-342-5p
- hsa-miR-3614-3p
- hsa-miR-511-5p
- hsa-miR-642a-5p
- hsa-miR-146b-5p
- hsa-miR-766-3p
- hsa-miR-625-3p
- hsa-miR-653-5p
- hsa-miR-944
- hsa-miR-29b-3p
- hsa-miR-29b-2-5p
- hsa-miR-3690
- hsa-miR-29c-5p
- hsa-miR-1228-5p
- hsa-miR-148a-3p
- hsa-miR-629-3p
- hsa-let-7i-3p
- hsa-miR-505-5p
- hsa-miR-181a-3p
- hsa-miR-361-3p
- hsa-miR-708-3p
- hsa-miR-3653-3p
- hsa-miR-200c-3p
- hsa-miR-486-3p
- hsa-miR-330-5p
- hsa-miR-708-5p
- hsa-miR-618
- hsa-miR-3667-5p
- hsa-miR-1295a
- hsa-miR-3678-5p
- hsa-miR-148a-5p
- hsa-miR-1270
- hsa-miR-326
- hsa-miR-548b-3p
- hsa-miR-206
- hsa-miR-21-5p
- hsa-miR-3202
- hsa-miR-21-3p
- hsa-miR-942-5p
- hsa-miR-1249-3p
- hsa-miR-141-3p
- hsa-miR-7-1-3p
- hsa-miR-141-5p
- hsa-miR-194-5p

Cox regression:  
logtest pv=1.2e-04  
LHR=-1.32 (CI = -1.99, -0.64)

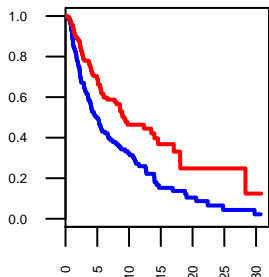

Cluster  
pv=4.3e-38

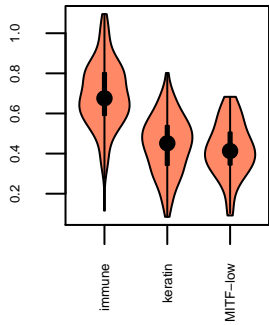

factor  
Cluster  
SampleType  
Dataset  
Gender

p.value  
4.33e-38  
6.99e-03  
8.73e-03  
1.67e-01

SampleType  
pv=7.0e-03

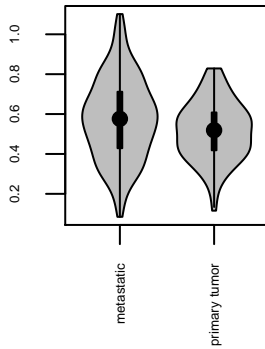

Dataset  
pv=8.7e-03

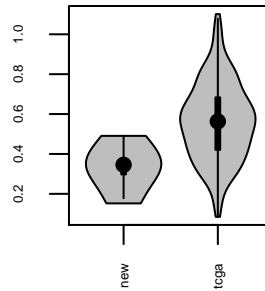

Gender  
pv=1.7e-01

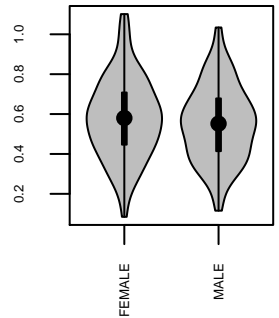

# MIC22 (stability 0.982)

## Metagene (involvement of features)

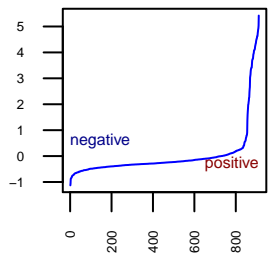

### 2 negative

- hsa-miR-1305
- hsa-miR-504-5p

### 71 positive

- hsa-miR-127-3p
- hsa-miR-127-5p
- hsa-miR-134-5p
- hsa-miR-136-3p
- hsa-miR-136-5p
- hsa-miR-154-3p
- hsa-miR-154-5p
- hsa-miR-299-3p
- hsa-miR-299-5p
- hsa-miR-323a-5p
- hsa-miR-323b-3p
- hsa-miR-329-3p
- hsa-miR-337-3p
- hsa-miR-369-3p
- hsa-miR-369-5p
- hsa-miR-370-3p
- hsa-miR-376a-3p
- hsa-miR-376a-5p
- hsa-miR-376b-3p
- hsa-miR-376c-3p
- hsa-miR-377-3p
- hsa-miR-377-5p
- hsa-miR-379-3p
- hsa-miR-379-5p
- hsa-miR-380-3p
- hsa-miR-380-5p
- hsa-miR-381-3p
- hsa-miR-382-5p
- hsa-miR-409-3p
- hsa-miR-409-5p
- hsa-miR-410-3p
- hsa-miR-411-3p
- hsa-miR-411-5p
- hsa-miR-431-3p
- hsa-miR-431-5p
- hsa-miR-432-5p
- hsa-miR-433-3p
- hsa-miR-485-3p
- hsa-miR-485-5p
- hsa-miR-487a-3p
- hsa-miR-487b-3p
- hsa-miR-493-3p
- hsa-miR-493-5p
- hsa-miR-495-3p
- hsa-miR-496
- hsa-miR-539-5p
- hsa-miR-541-3p
- hsa-miR-543
- hsa-miR-654-3p
- hsa-miR-654-5p
- hsa-miR-655-3p
- hsa-miR-656-3p
- hsa-miR-668-3p
- hsa-miR-758-3p
- hsa-miR-889-3p
- hsa-miR-541-5p
- hsa-miR-770-5p
- hsa-miR-203a-3p
- hsa-miR-337-5p
- hsa-miR-1185-5p
- hsa-miR-708-3p
- hsa-miR-873-5p
- hsa-miR-223-3p
- hsa-miR-412-3p
- hsa-miR-199b-5p
- hsa-miR-653-5p
- hsa-miR-214-3p
- hsa-miR-1193
- hsa-miR-206
- hsa-miR-625-3p
- hsa-miR-125b-2-3p

Cox regression:  
logtest pv=6.4e-01  
LHR=0.08 (CI = -0.27, 0.44)

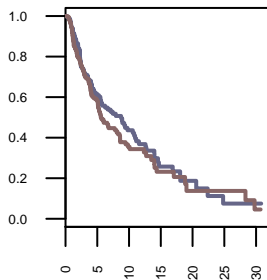

Cluster  
pv=1.8e-05

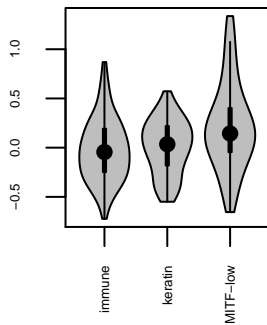

factor  
Cluster  
Dataset  
SampleType  
Gender

p.value  
1.78e-05  
1.17e-01  
1.38e-01  
5.37e-01

Dataset  
pv=1.2e-01

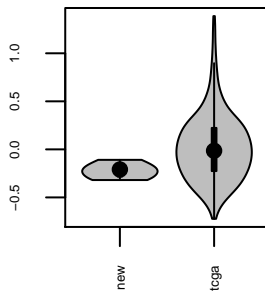

SampleType  
pv=1.4e-01

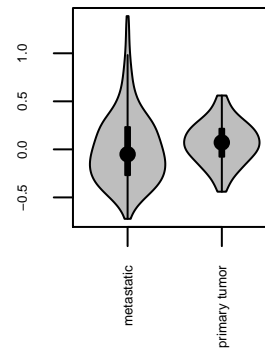

Gender  
pv=5.4e-01

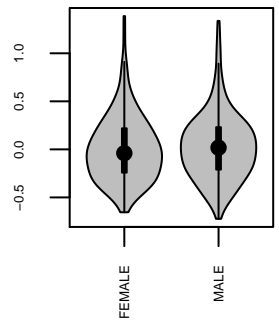

**Metagene**  
(involvement of features)

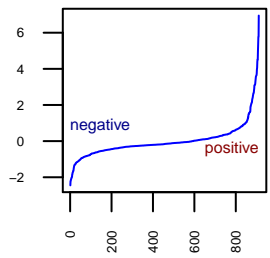

**MIC25 (stability 0.875)**

**18**  
**negative**

**57**  
**positive**

- hsa-miR-221-5p
- hsa-miR-219a-2-3p
- hsa-miR-194-3p
- hsa-miR-206
- hsa-miR-222-3p
- hsa-miR-210-3p
- hsa-miR-221-3p
- hsa-miR-222-5p
- hsa-miR-135b-5p
- hsa-miR-323a-5p
- hsa-miR-194-5p
- hsa-miR-192-5p
- hsa-miR-541-5p
- hsa-miR-30b-3p
- hsa-miR-30d-5p
- hsa-miR-625-3p
- hsa-miR-378c
- hsa-miR-3130-5p
- hsa-miR-1247-5p
- hsa-miR-143-5p
- hsa-miR-145-3p
- hsa-miR-145-5p
- hsa-miR-195-5p
- hsa-miR-199a-3p
- hsa-miR-199a-5p
- hsa-miR-199b-3p
- hsa-miR-199b-5p
- hsa-miR-214-3p
- hsa-miR-214-5p
- hsa-miR-217
- hsa-miR-483-3p
- hsa-miR-483-5p
- hsa-miR-497-5p
- hsa-miR-675-3p
- hsa-miR-887-3p
- hsa-miR-216a-5p
- hsa-miR-195-3p
- hsa-miR-708-5p
- hsa-miR-1-3p
- hsa-miR-452-5p
- hsa-miR-218-5p
- hsa-miR-139-5p
- hsa-miR-143-3p
- hsa-miR-139-3p
- hsa-miR-224-5p
- hsa-miR-126-3p
- hsa-miR-126-5p
- hsa-miR-452-3p
- hsa-let-7c-5p
- hsa-miR-708-3p
- hsa-miR-99a-5p
- hsa-miR-133a-3p
- hsa-miR-1295a
- hsa-miR-99a-3p
- hsa-miR-196a-5p
- hsa-miR-125b-2-3p
- hsa-miR-24-1-5p
- hsa-miR-196b-5p
- hsa-miR-224-3p
- hsa-miR-218-1-3p
- hsa-miR-3651
- hsa-miR-27b-5p
- hsa-miR-585-3p
- hsa-miR-149-5p
- hsa-miR-27b-3p
- hsa-miR-205-5p
- hsa-miR-193b-3p
- hsa-miR-150-5p
- hsa-miR-146b-5p
- hsa-miR-1258
- hsa-miR-369-5p
- hsa-miR-31-3p
- hsa-miR-598-3p
- hsa-miR-125b-5p
- hsa-miR-450a-5p

**Cox regression:**  
**logtest pv=7.3e-01**  
**LHR=-0.12 (CI = -0.83, 0.58)**

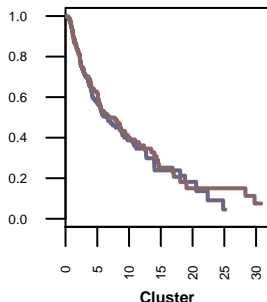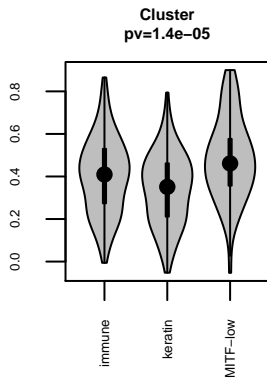

**factor**  
Cluster  
Dataset  
Gender  
SampleType

**p.value**  
1.44e-05  
9.09e-02  
5.15e-01  
8.37e-01

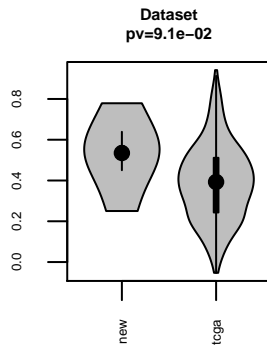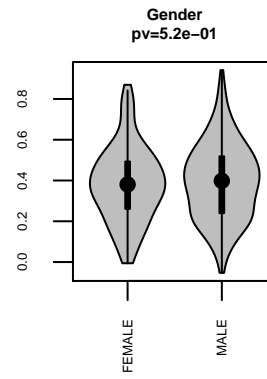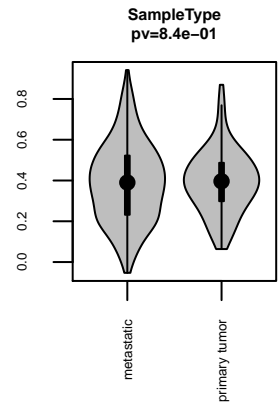

Supplement: 12920_2019_578_MOESM2_ESM.pdf [file 12920_2019_578_MOESM2_ESM.pdf]
